# Supplementary material for: Telomeres control human telomerase (TERT) expression through non-telomeric TRF2
Source: eLife. 2025 Sep 30;14:RP104045. doi: 10.7554/eLife.104045 (PMC12483519; doi:10.7554/eLife.104045)
Supplement: Figure 2—figure supplement 1—source data 1. [file elife-104045-fig2-figsupp1-data1.xlsx]

## Sheet: TL RT PCR HT1080 TERT+TERC A
		LT= TERC+TERT overexp
		36b4		Tel repeat						Fold change
HT1080	A	32.7		18.6
		32.62		18.32
		32.69	32.67	18.35	18.4233		-14.2467		0	1
	B	34.14		18.42										#REF!
		33.78		18.46										#REF!
		34.02	33.98	18.39	18.4233		-15.5567		0	1
HT1080 LT	A	35.06		18.42
		34.79		18.34
		34.24	34.7	18.27	18.3433		-16.3539		-2.10724	4.30865		3.11621
	B	33.9		17.29
		33.9		17.38
		33.61	33.9	17.53	17.4		-16.5006		-0.943945	1.92378
		36b4		Tel repeat						Fold change
HT1080	HT 10ng	21.09		12.7
		21.07		12.55
		21.63	21.2633	14.01	12.625		-8.63833		0	1
	HT 5ng	22.02		14.45
		21.98		14.37
		22.31	22.1033	15.03	14.41		-7.69333		0	1
HT1080 LT	LT 10ng	21.34		10.72
		21.24		10.79
		21.77	21.45	11.23	10.9133		-10.5367		-1.89833	3.72782		6.30219		1	10.1395
	LT 5ng	22.31		12.02										1	3.11621
		22.33		11.78										1	6.30219
		23.59	22.7433	13.18	11.9		-10.8433		-3.15	8.87656
													p value	0.11287

## Sheet: TL RT PCR MDAMB GTR OLIGO  A
MDAMB231 OF (10ng)						Tel-36b4	(expt-control)delct	fold change		Avg.	MDAMB231 OF (20ng)						Tel-36b4	(expt-control)delct	fold change
	Rep1_10ng	36B4		Tel								Rep1_20ng	36B4		Tel
	UT	27.12	27.12	25.63	25.63	-1.49						UT	26.54	26.54	24.52	24.55	-1.99
		27.15		25.59									26.51		24.59
		27.09		25.67									26.57		24.55
	MDAMB231 OF (10ng)	27.36	27.35	23.17	23.2	-4.15	-2.66	6.34		6.605		MDAMB231 OF (20ng)	26.17	26.14	21.42	21.37	-4.77	-2.78	6.87
		27.31		23.21									26.09		21.34
		27.38		23.19									26.15		21.37
	Rep2_10ng	36B4		Tel								Rep2_20ng	36B4		Tel
	UT	27.98	27.95	25.74	25.78	-2.17						UT	26.78	26.81	24.32	24.34	-2.47
		27.96		25.78									26.81		24.37
		27.91		25.81									26.83		24.33
	MDAMB231 OF (10ng)	27.38	27.42	22.57	22.61	-4.81	-2.64	6.23		6.05		MDAMB231 OF (20ng)	26.27	26.23	21.17	21.21	-5.02	-2.55	5.87
		27.46		22.63									26.23		21.23
		27.42		22.61									26.19		21.22

## Sheet: TL RT PCR-HCT TEL TRIMMING A
		ts= telomere trimming( telomere short)- ST
				tel		del ct ( tel - 36b4)		del del ct ( TS-WT)	fold change (2^(-deldelct)		36B4
		HCT 116 TS - 20ng		13.1497	13.0955	-9.18383	10.2506	0	1		22.3864	22.2794
				13.0204			0.000820838				22.1723
				13.1164							23.0268
		HCT 116 TS - 10ng		14.2934	14.3726	-9.06492		0	1		23.3755	23.4376
				14.2246							23.4937
				14.5999							23.4435
		HCT 116 20ng		14.0514	13.9285	-10.2506		-1.06679	2.09476		23.9155	24.1791
				13.8055							23.9868
				15.1073							24.6349
		HCT 116 10ng		14.7534	14.8729	-10.1966		-1.13169	2.19115		25.0439	25.0695
				14.8079							25.0715
				15.0573							25.093

## Sheet: TL RT PCR-hct knock A
		36B4		Tel primer		delct	deldel ct	fold change
HCT116 p53-/- SCR	a	22.41		14.67
		22.47		14.66
		22.48	22.45	15.12	14.8167	-7.63333	-0.693333	1.61702
									1.91041
	b	22.06		13.45
		22.09		13.48
		21.48	22.07	13.23	13.39	-8.68	-1.14	2.20381
HCT116 p53-/- TERC-/-	a	22.01		15.34
		22.1		14.91
		22.05	22.05	15.09	15.11	-6.94	0.693333	0.618423
	b	21.56		14.03
		21.69		14.11
		21.39	21.55	13.89	14.01	-7.54	1.14	0.45376
		36B4		Tel primer		delct	deldel ct	fold change
HCT116 p53-/- SCR	a	23.04		14.7
		23.02		15.07
		22.78	22.94	15.13	14.97	-7.97	-0.38	1.30134
									1.32429
	b	21.77		13.69
		22.04		13.58
		22.01	21.94	13.63	13.63	-8.31	-0.43	1.34723
HCT116 p53-/- TERC-/-	a	22.83		15.55
		23.06		15.27
		22.92	22.94	15.24	15.35	-7.59	0.38	0.768438
	b	22.15		14.24
		22.18		14.26
		22.07	22.13	12.64	14.25	-7.88	0.43	0.742262
terc--= ST
scr=LT

## Sheet: TRAP HT1080 TERT+TERC B
		Absorbance at 690 (neg. control adjusted)	Absorbance at 450 (neg. control adjusted)	Difference	Average	Fold change
	HT1080	0.0384	0.1892	0.1508	0.14865	1
		0.0387	0.1852	0.1465
								LT= TERC+TERT overexp
	HT1080 LT	0.0384	0.2926	0.2542	0.25305	1.70232
		0.0387	0.2906	0.2519
	HT1080	0.0396	0.2046	0.165	0.16615	1
		0.0401	0.2074	0.1673
	HT1080 LT	0.0385	0.3614	0.3229	0.32405	1.95035
		0.0413	0.3665	0.3252

## Sheet: TRAP MDAMB GTR OLIGO B
	OF=GTR Oligo Fed= LT
					Absorbance at 690 (neg. control adjusted)	Absorbance at 450 (neg. control adjusted)	Difference	Average	Fold change
				MDAMB 231 UT	-0.0265	0.2732	0.2997	0.2975	1
					-0.0253	0.27	0.2953
				MDAMB 231 OF	-0.01235	0.35085	0.3632	0.36315	1.22067
					-0.01095	0.35215	0.3631
					Absorbance at 690 (neg. control adjusted)	Absorbance at 450 (neg. control adjusted)	Difference	Average	Fold change
				MDAMB 231 UT	0.0393	0.405	0.3657	0.3682	1
					0.0387	0.4094	0.3707
				MDAMB 231 OF	0.0392	0.4301	0.3909	0.39005	1.05934
					0.0394	0.4286	0.3892

## Sheet: TRAP HCT TEL TRIMMING B
	tel sgrna= telomere trimming( telomere short)- ST
					Absorbance at 690 (neg. control adjusted)	Absorbance at 450 (neg. control adjusted)	Difference	Average	Fold change
				HCT116 UT	0.039	0.555	0.516	0.47505	1	1.23969
					0.0427	0.4768	0.4341
				HCT116 TEL SGRNA	0.0393	0.435	0.3957	0.3832	0.806652
					0.0387	0.4094	0.3707
					Absorbance at 690 (neg. control adjusted)	Absorbance at 450 (neg. control adjusted)	Difference	Average	Fold change
				HCT116 UT	0.0445	0.2482	0.2037	0.22975	1	1.53628		1.23969	1.53628
					0.0419	0.2977	0.2558
				HCT116 TEL SGRNA	0.0409	0.189	0.1481	0.14955	0.650925
					0.0417	0.1927	0.151

## Sheet: TRAP HCT TERC KNOCK B
		Absorbance at 690 (neg. control adjusted)	Absorbance at 450 (neg. control adjusted)	Difference	Average	Fold change
	HCT116 NULL SCR	0.0407	0.563	0.5223	0.5405	2.35205
		0.0443	0.603	0.5587
	HCT116 NUL HTR SIL.	0.0404	0.2696	0.2292	0.2298
		0.0472	0.2776	0.2304
		Absorbance at 450	Absorbance at 690	Difference	Average	Neg control adjusted	Fold change
	neg. control	0.1801	0.0435	0.1366					1.84678
		0.1837	0.0409	0.1428	0.1397				2.35205
	HCT116 NULL SCR	0.9595	0.051	0.9085
		1.0975	0.0488	1.0487	0.9786	0.8389	1.84678
	HCT116 NUL HTR SIL.	0.6739	0.0436	0.6303
		0.5985	0.0409	0.5576	0.59395	0.45425
	UT=LT
	HTR SIL=TERC KNOCKDOWN=st
