# Supplementary material for: Telomeres control human telomerase (TERT) expression through non-telomeric TRF2
Source: eLife. 2025 Sep 30;14:RP104045. doi: 10.7554/eLife.104045 (PMC12483519; doi:10.7554/eLife.104045)
Supplement: Figure 2—source data 1. [file elife-104045-fig2-data1.xlsx]

## Sheet: tel length FACS 1A
				LT= TERC+TERT overexp
					Median	Delta fluorescence (Stained-unstained)	Fold difference in TEL FITC SIGNAL
			tel FITC	HT1080	1352	901	1
				LT	3583	2791	3.09767
				HT1080	451
			UNSTAINED	LT	792

## Sheet: TRF2  ChIP 1B
			0- -300bp			GAPDH				Telomere
		HT1080 TRF2 1	29.49			35.28				29.39
			29.98			35.74				29.49
			29.29	29.59	-1.98	35.8	35.61	1.25663		29.04	29.31	-2
		HT1080 IgG 1	31.02		3.94477	34.86		0.418522		31.21		4
			32.11			33.84				31.4
			29.46	31.57		36.82	34.35			33.53	31.31
		HT1080 Input	30.13			36.2				31.26
			30.37			36.09				30.66
			30.9	30.47		43.94	36.14			28.6	30.96
		HT1080 TRF2 2	30.1			36.95				29.49
			30.55			35.38				29.98
			30.55	30.4	-2.11609	34.73	35.05	0.311641		29.29	29.59	-1.97994
		HT1080 IgG 2	32.64		4.33518	34.87		0.805725		31.02		3.94477
			32.5			34.61		0.324485		32.11
			32.41	32.52		36.24	34.74			29.46	31.57
		HT1080 Input 2	36.68			34.78				30.13
			35.8			34.57				30.37
			35.58	36.02		34.17	34.51			30.9	30.47
		LT TRF2 1	32.64			47.09				30.54
			33.1			45.56				30.33
			32.57	32.77	0.19521	45.33	45.445	-0.035		30.49	30.4533	-0.336667
		LT IgG 1	33.32		0.873446	38.19		1.02456		30.98		1.26284
			32.64			46.6				30.13
			31.76	32.57		44.37	45.48			31.26	30.79
		LT Input 1	32.55			36.26				30.21
			33.89			34.66				30.17
			34.27	34.08		34.01	34.34			30.27	30.22
		LT TRF2 2	32.36			33.22				30.26
			32.52			33.08				29.14
			31.14	32.44	1.2747	33.94	33.41	0.606447		29.42	29.28	-0.329366
		LT IgG 2	30.8		0.413311	32.63		0.656812		29.03		1.25646
			31.58			34.07		0.378892		29.92
			31.13	31.17		32.98	32.81			29.3	29.61
		LT Input 2	32.77			35.63				31.08
			33.83			34.35				30.66
			31.96	32.85		36.58	34.99			31.83	31.19
			0- -300bp			GAPDH			Telomere
		HT1080 TRF2 2	30.429			33.4957			29.1156
			29.817			32.5586			29.8443
			30.3194	30.1884	-1.7554	32.8021	32.6803	0.2557	28.8499	29.3471	-0.5215
		HT1080 IGG 2	31.9176		3.3762	32.2311		0.8376	29.7058		1.4354
			32.3125			32.576			30.8679
			31.6014	31.9438		32.6183	32.4247		30.0313	29.8686
		HT1080 Input 2	33.535			34.7821			31.2212
			33.1987			34.5692			31.6901
			34.0057	33.5798		34.1688	34.5067		30.4942	31.1352
		LT TRF2 2	34.4294			35.2404			31.0186
			34.5498			34.5295			30.0345
			34.3312	34.3803	0.0318	34.0269	34.6336	1.0085	30.2762	30.6474	-0.4934
		LT IGG 2	34.4894		0.9782	32.8879		0.4971	30.9949		1.4078
			34.3687			33.5887			30.3175
			34.2075	34.3485		34.3624	33.6251		31.2867	31.1408
		LT Input 2	32.7735			35.6342			31.2806
			33.8279			34.3459			34.1359
			31.956	32.8525	29.5325	36.5839	35.5213	32.2013	31.4496	32.2887	28.9687
		LT= TERC+TERT overexp

## Sheet: H3K27me3  ChIP  1C
			0-300bp tert			GAPDH
		HT H3K27ME3	31.95			44.4992
			32.01			38.0196
			32.17	32.04	-2.0276	43.9824	44.2408	7.66425
		HT H3	33.64		4.07727	37.9867		0.00492981
			33.92			35.2638
			34.65	34.07		36.4792	36.5766
rep1	28.11.19	HT INPUT	32.7			36.7311
			33.03			35.4741
			32.3	32.67		37.2318	36.479
		LT H3K27ME3	31.0524			37.3284
			31.3313			35.7448
			30.922	31.1019	0.609066	37.232	37.2802	0.261055
		LT H3	30.3607		0.655621	38.4968		0.834478
			30.5093			35.4349
			30.6085	30.4928		37.1257	37.0191
		LT INPUT	32.4934			33.823
			32.3268			34.44
			33.1134	32.6445		34.4472	34.2367
			0-300bp tert			GAPDH
		HT1080 H3K27me3 1	32.187			37.7324
			32.4147			38.1237
			31.5452	32.049	-1.68553	38.7803	38.2121	1.2706
rep2	2.1.20	HT1080 H3	32.7885		3.21659	36.698		0.414488
			34.7953			37.0201
			33.6197	33.7345		37.1065	36.9415
		HT1080 LT H3K27me3 1	33.0393			33.3484
			33.2591			34.1328
			32.8197	33.0393	1.25274	34.4549	33.9787	0.248833
		HT1080 LT H3	31.832		0.419652	36.7913		0.841577
			32.0986			32.7488
			31.4293	31.7866		34.711	33.7299
		LT= TERC+TERT overexp
			0-300bp tert			GAPDH
		HT1080 H3K27me3	29.2044			32.0102
			29.7534			34.0961
			29.7224	29.5601	-2.27478	34.9099	33.6721	-0.379122
rep3	13 1 20	HT1080 H3	31.7303		4.83922	34.6547		1.30055
			32.2512			33.7219
			31.5231	31.8348		33.7769	34.0512
		HT1080 Input	31.4838			31.0915
			31.0749			31.339
			31.1896	31.1322		30.3428	30.9244
		LT H3K27me3	32.7284			34.7612
			33.2577			33.394
			32.7216	32.9026	1.05361	33.0605	33.7386	0.0158587
		LT H3	32.0694		0.481762			0.989068
			31.7394			33.1914
			31.7381	31.849		34.254	33.7227
		LT Input	31.1601			30.4257
			31.0271			31.1711
			30.8928	31.0267		30.4186	30.6718

## Sheet: mRNA  1D
				GAPDH			TERT ENDO		DELTA CT		delta ct	deld del ct	fold change	delta ct	deldel ct	fold change
		HT1080		16.54			23.0982				HT1080 ST			HT1080 LT
				16.68			23.1512				6.51293	0.680715	0.623856	4.23334	-1.59888	3.02908
				16.26	16.49		22.7594	23.0029	6.51293		5.60835	-0.223871	1.16786	3.75412	-2.07809	4.22249
		HT1080 LT		16.43			21.0048				5.37537	-0.456844	1.37254	3.85644	-1.97578	3.93341
				16.98			20.9219
				16.78	16.73		21.0531	20.9633	4.23334		5.83222
				GAPDH			TERT ENDO		delta ct
		HT		17.69			23.4192
				17.84			23.3328
				17.26	17.765		23.368	23.3733	5.60835
		LT		17.57			21.3713
				17.5			21.3401
				17.68	17.5833		21.301	21.3375	3.75412
		HT2		17.75			23.3068
				17.88			23.233
				17.94	17.86		23.1663	23.2354	5.37537
		LT2		17.34			21.1802
				17.14			21.0658
				17.35	17.28		21.1633	21.1364	3.85644
LT= TERC+TERT overexp
