# Supplementary material for: Telomeres control human telomerase (TERT) expression through non-telomeric TRF2
Source: eLife. 2025 Sep 30;14:RP104045. doi: 10.7554/eLife.104045 (PMC12483519; doi:10.7554/eLife.104045)
Supplement: Figure 2—source data 2. [file elife-104045-fig2-data2.xlsx]

## Sheet: Tel FACS 1A
																Unstained	stained			fold change
															ut	39412	67320		27908
															of iii	13795	143853		130058	4.66024
																OF=GTR Oligo Fed= LT

## Sheet: TRF2_ChIP 1B
Replicate 1
	0-300 bp		IgG		delCT_FOLD CHANGE		GAPDH		IgG				telomere		igg
OF1 (LT)	35.271	35.321	36.4354	36.124	-0.803025		35.1574	36.5622	37.0891	36.9356	-0.373397		17.0462	16.976	17.8898	18.2367	-1.26069
	35.3193		35.8811		1.74476		36.8223		36.7821		1.2954		17.0838		18.0117		2.39611
	35.3726		36.0555				36.302		37.8331				16.798		18.8085
UT1	33.3489	33.2445	35.2635	35.1464	-1.90182		30.3049	30.1168	29.8105	29.8435	0.273237		18.58	18.505	18.07	18.965	-0.46
	33.2412		35.2852		3.73683		29.9287		30.0236		0.827461		18.43		19.86		1.37554			0- 300	3.57384	3.73683	3.38585	1.38654	1.74476	1.22801
	33.1435		34.8904				31.0184		29.6966				19.38		19.16					GAPDH (-ve control)	0.907049	0.827461	0.559483	1.11793	1.2954	0.893557
Replicate 2
OF2 (LT)	35.1939	35.2482	35.5662	35.5446	-0.296319		30.046	29.8656	29.422	29.7032	0.162368		18.2294	18.4147	19.6357	19.3948	-0.980132
	35.2407		35.5752		1.22801		29.8569		29.6129		0.893557		18.2471		19.3235		1.97265
	35.3101		35.4923				29.6938		30.0747				18.7676		19.2254
UT2	33.8013	33.8098	35.9367	35.5693	-1.75952		37.201	37.1988	36.7889	36.361	0.837834		13.095	13.0799	13.759	13.8172	-0.737296				2.39611	1.37554
	33.9094		35.3805		3.38585		36.8311		36.3961		0.559483		13.0648		13.8754		1.66705				1.97265	1.66705
	33.7187		35.3908				37.5644		35.898				13.1258		13.5141						7.34982	1.76357
	0-300 bp			GAPDH			TELOMERE
OF REP 3 (LT)	29.0361			29.4451			17.5807
	29.1153			29.3034			17.528
	28.9328	29.0281	-0.471494	29.4477	29.3987	-0.160835	17.4474	17.5187	-2.87771
IgG	29.624		1.38654	29.4253		1.11793	20.4062		7.34982
	29.3132			29.6938			20.3959
	29.5614	29.4996		33.0401	29.5596		20.3872	20.3964
UT3	35.2577			32.3082			12.0406
	34.606			31.8926			12.1845
	34.5748	34.8128	-1.83748	32.7975	32.3328	0.140748	12.0404	12.0885	-0.818499
igg	36.6003		3.57384	31.957		0.907049	13.0051		1.76357
	36.7003			32.427			12.8089
	34.6673	36.6503		0	32.192		12.7762	12.907
OF=GTR Oligo Fed= LT

## Sheet: H3K27me3_ChIP  1C
	UT
		0-300BP				GAPDH
R1	27me3	8.6506				31.3653
		31.2912				31.4052
		30.0793	30.6852	-0.523455		31.9283	31.5662	0.279295
	h3	31.1812		1.43739		30.739		0.823994
		31.2362				31.6922						hTERT promoter	1.61475	2.05247	1.43739	0.796898	0.503629	1.02567
		32.466	31.2087			31.4296	31.287					GAPDH (-ve control)	0.606261	0.313267	0.823994	1.06812	1.19402	0.783977
R2	27me3	30.5123				32.2394
		30.3481				31.5805
		31.1211	30.6605	-1.03736		32.2543	32.0247	1.67453
	h3	31.9219		2.05247		30.7228		0.313267
		31.5323				29.7347
		31.6393	31.6978			30.5931	30.3502
R3	27me3	31.3996				31.6465
		30.1001				31.7632
		31.476	30.9919	-0.691314		31.607	31.6722	0.72199
	h3	32.0303		1.61475		31.0198		0.606261
		31.7666				30.8807
		31.2527	31.6832			20.7711	30.9502
OF (LT)
		0-300BP				GAPDH
R1	27me3	31.0098				30.8222
		31.9475				30.8717
		31.9094	31.6222	0.327534		30.4904	30.7281	-0.0950804
	h3	31.2851		0.796898		31.2561		1.06812
		31.2238				30.5825
		31.3752	31.2947			30.6311	30.8232
R2	27me3	36.5465				31.0399
		36.7048				31.408
		36.8882	36.7132	0.989568		31.6846	31.3775	-0.255831
	h3	36.1151		0.503629		31.8062		1.19402
		35.71				31.4074
		35.3457	35.7236			31.6865	31.6333
R3	27me3	35.9055				30.2621
		35.6052				30.4736
		35.1538	35.5548	-0.036568		29.5016	30.3678	0.351118
	h3	35.5755		1.02567		29.9841		0.783977
		35.4449				30.2188
		35.7539	35.5914			29.8472	30.0167
OF=GTR Oligo Fed= LT

## Sheet: mRNA 1D
Replicate 1
	TERT_15/16					TERT_7/8					18S
OF1	23.94	23.9367	5.5913	-1.68157	3.20777	20.5706	20.6093	2.26397	-2.42498	5.37023	18.4008	18.3454
	24.01					20.5042					18.4377
	23.86					20.7532					18.1976
UT1	25.047	25.2683	7.27287			22.6116	22.6844	4.68895			18.058	17.9954
	25.3871					22.7817					17.6997
	25.3708					22.6598					18.2286
Replicate 2
OF2	21.629	21.5328	3.93151	-2.33526	5.04642	21.0047	20.9756	3.37434	-1.19745	2.29334	17.6136	17.6013			3.20777		5.37023
	21.5407					20.9588					17.589				5.04642		2.29334
	21.4287					20.9633					17.6013				2.05279		2.43683
UT2	24.0914	23.9668	6.26677			22.0562	22.2718	4.57179			17.85	17.7
	23.8479					22.3022					17.64
	23.961					22.457					17.61
Replicate 3
OF3	22.6432	22.5247	3.94724	-1.03758	2.05279	20.8271	20.891	2.31351	-1.28501	2.43683	18.565	18.5774
	22.6928					20.8146					18.6268
	22.2381					21.0311					18.5405
UT3	23.8217	23.8793	4.98483			22.6055	22.493	3.59852			18.9418	18.8945
	23.7667					22.4248					18.7827
	24.0496					22.4487					18.9589
OF=GTR Oligo Fed= LT
