# Supplementary material for: Telomeres control human telomerase (TERT) expression through non-telomeric TRF2
Source: eLife. 2025 Sep 30;14:RP104045. doi: 10.7554/eLife.104045 (PMC12483519; doi:10.7554/eLife.104045)
Supplement: Figure 2—source data 3. [file elife-104045-fig2-data3.xlsx]

## Sheet: tel facs 1A
								unstained	stained
							hct tel short	8886	192002		183116
							hct wt	15813	401000		385187	2.10351

## Sheet: TRF2  1B
		tel sgrna= telomere trimming( telomere short)- ST
					0-300			GAPDH				Telomere
			HCT WT TRF2 2		32.4625							16.0908
					33.8644			39.9473				16.0298
					34.3327	33.5532	-0.668404	39.9342	39.9407	0.370803		16.046	16.0555	-1.39908				st	st	st	lt	lt	lt
			HCT WT IGG 2		34.2028		1.58931	39.7149		0.773352		17.4933		2.63733			0-300	3.23	4.1052	3.25305	1.59	1.42064	1.32115
					34.2403			39.4728				17.3899					GAPDH	0.18	0.723592	0.689001	0.77	0.0424849	0.465795
						34.2216		39.5221	39.5699			17.4805	17.4546
			HCT WT TEL TRF2		28.9866			38.8401				16.019
					29.2261			39.834				16.028
					29.1332	29.1153	-1.69041		39.337	2.48331		16.306	16.1177	-1.23555
			HCT WT TEL IGG		31.0483		3.22748	36.872		0.178833		17.3771		2.3547
					30.7131							17.3143
					30.6557	30.8057		36.8354	36.8537			17.3683	17.3532
					0-300			GAPDH				telomere
					28.6081							15.2769
			HCT TEL TRF2		28.4103			40.3218				15.199
					28.7561	28.5915	-2.03745	38.9487	39.6352	0.466752		15.3716	15.2825	-0.441012
					30.2935		4.1052	41.8743		0.723592		15.6145		1.35756
			IGG		30.6294			39.0476				15.7678
					30.9638	30.6289		39.2893	39.1685			15.7882	15.7235
								40.4273
					0-300			GAPDH				telomere
			HCT WT TRF2		30.3809			37.2621				16.4255
					30.3316			37.4478				16.2039
					30.4053	30.3726	-0.506538	37.4085	37.3728	4.55691		16.271	16.3001	-0.817604
			HCT WT IGG		30.8039		1.42064	32.1933		0.0424849		17.2072		1.76248
					30.782							16.9326
					31.0516	30.8791		33.4385	32.8159			17.2134	17.1177
					0-300			GAPDH				Telomere
			HCT IGG 1		31.8339			37.1522				13.6432
					32.5862			36.6099				13.8273
					32.3853	32.2685		36.6099	36.7907			13.8898	13.7868
			HCT TRF2		31.1601			38.0245				13.4849
					31.7357			38.4846				13.4816
					31.9976	31.8667	-0.401789	37.1696	37.8929	1.10223		13.4474	13.4713	-0.315462
							1.32115			0.465795				1.24441
												telomere
			tel igg 1		33.1202			37.4859				13.4703
					32.1307			37.8969				13.3719
					31.602	31.8664		0	37.6914			13.3963	13.4128
			tel trf2 1		30.0885			37.0576				12.0275
					30.2416							11.6368
					30.1636	30.1646	-1.70179	39.4	38.2288	0.537422		11.4926	11.719	-1.69388
							3.25305			0.689001				3.23526

## Sheet: h3k27me3  1C
				tel = telomere trimming( telomere short)= ST
				wt=lt
						0-300			GAPDH
				HCT WT H3K27ME3		32.4026			36.3931
						32.5669
						32.8037	32.5911	0.72779	36.6023	36.4977	0.159903
				HCT WT H3		31.7313		0.603828	36.6759		0.895085
						32.1281
						31.7304	31.8633		35.9997	36.3378
				HCT WT H3K27ME3 2		33.4942			41.0879
						34.2239			40.7887
						34.4031	34.0404	0.378734		40.9383	4.36179
				HCT WT H3 2		33.6845		0.769112	37.3269		0.0486373
						34.2775			35.805
						33.0229	33.6617		36.5976	36.5765
				HCT WT INPUT		32.8015
						32.5557			41.5483
						32.9551	32.7707		42.3712	41.9597
						0-300			GAPDH
				HCT WT TEL H3K27ME3		30.4656			39.902
						29.3384			38.8187
						29.5638	29.7892	-2.40069		39.3604	3.66113
				HCT WT TEL H3		32.1877		5.28054	35.0518		0.0790478
						32.1922			35.8258
							32.1899		36.2201	35.6992
				HCT WT TEL INPUT		31.5066			37.8458
						31.1715			36.0916
						31.3161	31.3314		38.7107	37.5494
						0-300			GAPDH
				HCT WT TEL H3K27ME3 2		33.5995			42.0906
						34.3355	33.9675	-2.08226	44.7437	42.0906	3.5119
						36.1344		4.2347	40.8079		0.087662
				HCT WT TEL H3 2		36.1392			38.4811
						35.8757	36.0498		38.6763	38.5787
				hct ut h3k27me3		0-300			GAPDH
						31.7169			0						st	st	st	lt	lt	lt
						31.4421			39.0028					0-300	5.28	4.2347	3.55	0.6	0.77	1.32967
						31.5913	31.5834	-0.411065	38.4798	38.7413	-0.809894			gapdh	0.08	0.087662	0.16	0.9	0.05	1.75308
				hct ut 3		32.6166		1.32967	0		1.75308
						31.2208			39.6974
						32.1461	31.9945		39.4051	39.5512
				hct tel h3k27me3		34.7298			40.4273
						33.5995			42.0906
						34.3355	34.2216	-1.82816	44.7437	41.2589	2.68024
				hct tel h3		36.1344		3.55083	40.8079		0.156016
						36.1392			38.4811
						35.8757	36.0498		38.6763	38.5787

## Sheet: mRNA  1D
tel = telomere trimming( telomere short)= ST
wt=lt			GAPDH	avg			TRF2	avg	delct	TERT 7/8	avg	del ct	deldel ct _ fold change	TERT 15/16
		HCT WT	28.9736				32.0254			31.0619				29.4105
			28.8284				32.0452			31.1434				29.419
			29.0145	28.9388			32.0106	32.0271	3.08826	31.0046	31.07	2.13117	-1.80998	29.1345	29.3213	0.382487
		WT TEL 1	28.0362				30.2989			32.7077			3.50637	31.3864		-2.34397
			28.4005				30.2848			32.1486				31.1269		5.07699			TERT 7/8	TERT 15/16
			28.9139	28.4502			30.4329	30.3388	1.88866	32.3177	32.3913	3.94115		31.0166	31.1766	2.72646		tel 1	3.50637	5.07699
									-1.1996									tel 2	3.0617	2.40525
									2.29676									tel 3	4.0286	7.24112
			GAPDH	avg			TRF2	avg	delct	TERT 7/8	avg	del ct	deldel ct _ fold change	TERT 15/16
		HCT wt 2	20.1998				28.5765			32.7644
			20.1684				28.5934			33.5261				32.2183
			20.1627	20.1769			28.6892	28.6197	8.44275	32.7452	33.0119	12.835	-1.61433	32.2236	32.221	12.044
		HCT tel 2	20.6413				25.4898			34.5437			3.0617	33.4241		-1.26619
			20.4491				25.6217			34.2673				34.2943		2.40525
			20.1881	20.4262			25.3514	25.4876	5.06145	35.8155	34.8755	14.4493		33.4908	33.7364	13.3102
									-3.3813
									10.4202
				GAPDH	avg		TRF2	avg	del ct	TERT 7/8	avg	del ct	deldel ct _ fold change	TERT 15/16	avg	del ct	deldel ct _ fold change
		WT 2		15.54			27.4245			28.0418				27.5289
				15.54			27.3513			28.0153				27.8075
				15.7	15.5933		27.3204	27.3654	11.772	28.0414	28.0328	12.4395	-2.01028	27.726	27.6874	12.0941	-2.85621
									-2.56151				4.0286				7.24112
									5.90326
				GAPDH	avg		TRF2	avg	del ct	TERT 7/8	avg	del ct	deldel ct _ fold change	TERT 15/16	avg	del ct	deldel ct _ fold change
		TEL 2		14.01			28.3621			28.461				28.6573
				13.86			28.1598			28.2491				29.2845
				13.85	13.9067		28.1987	28.2402	14.3336	28.3591	28.3564	14.4498		28.6291	28.857	14.9503
