# Supplementary material for: Telomeres control human telomerase (TERT) expression through non-telomeric TRF2
Source: eLife. 2025 Sep 30;14:RP104045. doi: 10.7554/eLife.104045 (PMC12483519; doi:10.7554/eLife.104045)
Supplement: Figure 2—source data 4. [file elife-104045-fig2-data4.xlsx]

## Sheet: tel FACS  1A
								MEDIAN		RTL
						hct116 p53 ut	unstained	6541
							tel fitc	311562	305021	1.4437
						hct116 p53 htr sil	unstained	7932
							tel fitc	219210	211278
						UT=LT
						HTR SIL=TERC KNOCKDOWN

## Sheet: TRF2  1B
			0- -300bp			GAPDH				Telomere POSITIVE CONTROL
		HCT SCR TRF2	28.9394			39.7163				30.3903
			28.5237			44.0303				29.9166
			28.0821	28.3029	0.5212	44.3114	44.1708	-0.4958		30.2236	30.1768	-0.8989
		HCT SCR IgG	27.8704		0.6968	45.1475		1.4101		31.1529		1.8647
			27.8542			48.6102				30.9987						telomere
			27.6206	27.7817		44.1858	44.6667			32.2899	31.0758			scr	1.8647	1.852	4.73479
		HCT SCR INPUT	28.1846			38.4351				30.2805				htr	1.3141	1.5627	1.34695
			27.8064			47.053				30.7393
			28.2084	28.0665		45.9491	46.5011			30.2189	30.4129
		HCT HTR SIL. TRF2	24.5853			42.3362				30.1044
			24.4108			48.2412				30.4104
			24.3442	24.4468	-2.6716	42.7221	42.5292	3.6167		30.2067	30.2405	-0.3941
		HCT HTR SIL. IgG	27.1863		6.37134	38.788		0.0815		30.9875		1.3141
			27.0658			39.037				30.5727
			27.103	27.1184		51.1017	38.9125			30.3437	30.6346
		HCT HTR SIL. INPUT	27.0987			41.5575				29.5998
			27.8961			42.1877				30.4881
			27.6157	27.5368		46.5748	43.44			30.0417
			0- -300bp			GAPDH				telomere
		HCT SCR TRF2 1	25.7965			36.7766				30.0671
			25.6892							30.1574
			25.6902	25.7253	0.1424	37.1313	36.9539	5.5632		30.4275	30.2174	-0.8891
		HCT SCR IgG	25.5698		0.906	32.0516		0.0212		34.0689		1.852
			25.5161			31.7067				31.0592
			25.6628	25.5829		30.414	31.3907			31.1536	31.1064
		HCT SCR INPUT	26.1062			29.1182				32.237
			26.1104			29.2049				32.9943
			26.0802	26.0989		29.0452	29.1227			33.4805	32.9039
		HCT HTR SIL. TRF2 1	23.1248			37.0457				30.9344
			23.16			33.6687				31.2432
			23.1205	23.1351	-2.6192	34.0411	33.8549	3.2363		32.1638	31.4471	-0.644
		HCT HTR SIL. IgG	25.7961		6.144	31.0557		0.1061		32.009		1.5627
			25.7177			30.1731				32.0171
			25.7491	25.7543		30.6268	30.6185			32.2475	32.0912
		HCT HTR SIL. INPUT	24.7444			26.1233				32.1287
			25.5833			25.8769				31.5741
			25.9955	25.4411		25.9409	25.9803			33.1721	32.2916
			0- -300bp			GAPDH				telomere
		HCT SCR TRF2 2	24.8207			31.87				30.0677
			25.0017			32.38				30.0953
			24.9861	24.9361	-0.510252	32.6975	32.3158	6.3156		30.2414	30.1348	-2.2433
		HCT SCR IgG	25.4013		1.4243	26.0783		0.0126		32.2574		4.73479
			25.5122			26.1723				33.6185
			25.4256	25.4464		25.7503	26.0003			31.2584	32.3781
rep3		HCT SCR INPUT	26.8254			26.8254				30.7084
			26.9067			26.9067				31.2514
			26.9437	26.8919		26.9437	26.8919			30.453	30.8043
		HCT HTR SIL. TRF2 2	22.666			32.8875				31.3994
			22.6201			30.5908				30.7638
			22.5924	22.6262	-3.15483	31.7716	31.7499	5.6343		30.0733	31.0816	-0.4297
		HCT HTR SIL. IgG	26.1435		8.90634	26.0882		0.0201		31.5527		1.34695
			25.2109			26.3912				34.3581
			25.9887	25.781		25.8675	26.1156			31.4698	31.5113
		HCT HTR SIL. INPUT	24.8618			24.0145				31.3824
			23.8884			24.4773				30.3388
			24.1249	24.2917		24.111	24.2009			31.0955	30.9389
		UT=LT=scr
		HTR SIL=TERC KNOCKDOWN=ST

## Sheet: H3K27ME3  1C
						-0-300bp			GAPDH
			HCT SCR H3			0			27.0281
						28.9285			26.6694
UT=LT=scr						29.0759	29.0022		27.2889	26.9955
HTR SIL=TERC KNOCKDOWN=ST			HCT SCR H3K27me3			29.067			27.377
						30.4613			27.4073
						30.0551	29.8611	0.858937	30.9426	27.3922	0.396699
			HCT SCR INPUT			30.1758		0.551359	22.256		0.759594
						32.1841			0
						32.0938	32.139		21.211	21.7335
			HCT HTR SIL. H3			31.6486			45.2639
						29.9709			41.0688
						30.0445	30.5547		41.5778	41.3233
			HCT HTR SIL. H3K27me3			29.5289			38.4019
						27.8834			0
						28.0301	27.9567	-2.59791	43.5382	40.9701	-0.353194
			HCT HTR SIL. INPUT			27.7015		6.0541	51.3187		1.27739
						30.6744			46.804
						30.4831	30.5787		38.1205	49.0613
						-0-300bp			GAPDH
			HCT SCR H3			36.4483			33.2071
						36.076			33.2411
						38.0741	36.2621		33.6325	33.3602
			HCT SCR H3K27ME3			35.0771			33.6605
						34.732			33.5063
						36.0238	34.9046	-1.35757	35.0878	33.5834	0.223123
			HCT SCR INPUT			36.0964		2.56253	38.2581		0.856709
						39.5563			39.9672
						36.1511	36.1238		39.6672	39.2975
			HCT HTR SIL. H3			42.1345			32.8263
						39.0384			32.1356
						38.0146	38.5265		32.6952	32.5524	-0.140393
			HCT HTR SIL. H3K27ME3			35.4609			32.7663		1.10221
						36.2624			34.175
						36.592	36.1051	-2.42145	32.0576	32.412
			HCT HTR SIL. INPUT			39.3623		5.3571
						40.8097			38.1534
						36.6701	40.086		38.7128	38.4331
						-0-300bp			GAPDH
			HCT SCR H3			31.5245			35.8407
						33.1177			35.7699
						32.3657	32.7417		35.3641	35.6582
			HCT SCR H3K27me3			33.3057			36.7592
						34.2652			40.1883
						33.1364	33.5691	0.827408	36.2644	36.5118	0.85354
			HCT hTR silenced H3			38.7462		0.563541	37.5624		0.553425
						37.694			45.8311
						38.6569	38.3657		35.6648	36.6136
			HCT hTR silenced H3K27me3			36.8824			36.275
						35.5906			48.0238
						36.4685	36.3139	-2.05183	37.1573	36.7162	0.102581
								4.1463			0.931366
								-300-450bp	-0-300bp	GAPDH
						SCR		0.7458	0.551359	0.494006
								0.774073	2.56253	0.856709
								0.480475	0.563541	0.553425
						HTR SIL.		1.28622	6.0541	1.27739
								2.67664	5.3571	1.10221
								2.37176	4.1463	0.931366
								1.72462	10.9803	2.58577
								3.45786	2.09055	1.28656
								4.93628	7.35759	1.68291

## Sheet: mRNA 1D
UT=LT=scr
HTR SIL=TERC KNOCKDOWN=ST						CT	av	del ct						av	del ct		del del ct	fold change WRT SCR
				HTR down	HTR	25.48	24.235	-1.505			SCR	HTR	22.22	22.25	-3.07478		1.56978	0.336859
						24.05							22.2
						24.42							22.33
unpaired t test calculation					hTERT exon 7/8	34.69	34.955	9.215				hTERT exon 7/8	41.66	33.165	7.84022		1.37478	0.385611
	exon 7/8					35.22							33.15
	htr down	scr				33.62							33.18
del ct	9.215	7.84022			hTERT exon 15/16	35.6068	35.3718	9.63181				hTERT exon 15/16	34.09	34.06	8.73522		0.896594	0.537153
	8.56155	7.40662				35.4955							34.03
	8.9	7.14667				35.0131							33.15
					GAPDH	25.7	25.74	0				GAPDH	25.2315	25.3248	0		0	1
avg del ct	8.89218					25.78							24.6218
						44.46							25.418
del del ct	0.322818	-1.05196
	-0.330635	-1.48556
	0.00781773	-1.74552
fc	0.799507	2.07335
	1.25757	2.80026
	0.994596	3.35315
	15/16
del ct	9.63181	8.73522
	10.19	8.62
	10.1596	9.17618
avg del ct	9.99381
del del ct	-0.361994	-1.25859
	0.196194	-1.37381
	0.165799	-0.81763				GAPDH			TERT 7/8			TERT 15/16
					HCT116 p53-/- TERC	18.66			27.5337			29.55
fc	1.2852	2.39261				19.02			27.3259			28.99
	0.87285	2.59153				18.92	18.87		27.4351	27.4315	8.56155	29.13	29.06	10.19
	0.891434	1.76251			HCT116 P53-/- scr	19.02			27.3762			27.55
						19			26.1647			27.54
						18.8	18.94		26.5285	26.3466	7.40662	27.6	27.56	8.62
														#DIV/0!
						Gapdh			TERT EXON 7/8			TERT EXON 15/16
					hct scr 1	28.82			35.66			38.55
						28.78			35.73			37.08
						28.31	28.64		35.97	35.7867	7.14667	34.95	37.81	9.17618
					hct htr 1	28.72			37.16			38.66
						28.29			37.69			41.26
						28.17	28.39		37.02	37.29	8.9	35.73	38.55	10.1596
