# Supplementary material for: Telomeres control human telomerase (TERT) expression through non-telomeric TRF2
Source: eLife. 2025 Sep 30;14:RP104045. doi: 10.7554/eLife.104045 (PMC12483519; doi:10.7554/eLife.104045)
Supplement: Figure 3—source data 1. [file elife-104045-fig3-data1.xlsx]

## Sheet: ht1080 REST
					0-300BP			GAPDH				SYNAPSIN (Positive control)
			LT REST		30.22			32.93				LT REST	37.0551
					30.32			33.74					34.8154
					30.09	30.21	0.259261	32.53	33.07	0.742635			35.1383	34.9768	-5.1151
			LT RB IGG		29.75		0.835516	32.79		0.597647		LT IGG	50.4972		34.6576
					29.94			32.14					40.1165
					30.16	29.95		32.05	32.32				40.0673	40.0919
			LT INPUT		31.72			36.54				LT INPUT	25.5302
								35.44					25.6921
					32.36	32.04		34.24	35.41				25.7131	25.6451
			HT REST		32.1			32.46				HT REST	44.9
					31.56			31.7					41.85
					31.49	31.72	-0.917015	32.07	32.08	-0.0928435			42.67	43.14	-3.13861
			HT RB IGG		32.88		1.8882	32.49		1.06647		HT IGG	46.16		8.80673
					32.72			31.85					0
					32.3	32.63			32.17				46.39	46.28
			HT INPUT		31.97			34.42				HT INPUT	26.8327
					32.25			34.18					27.1087
					31.94	32.05			34.3				26.9958	26.9791
					0- -300			GAPDH					synapsin
			HT REST 1		25.3763			35.14				ht rest 1	37.24
					25.6824			33.99					36.6
					25.5936	25.5508	-1.5676	34.94	34.69	-0.84			35.47	36.92	-1.28992
			HT REST 2		25.95		2.96411			1.79005		ht igg 1	38		2.44514
					25.87			34.41					38.49
					25.8	25.87	-0.733333	34.6	34.73	0.16			38.15	38.21
			HT IGG1		27.1863		1.66248	35.24		0.89
					27.0658			35.23				ht rest 2	40.98
					27.103	27.1184		36.12	35.53				38.5
			HT IGG 2		26.85			34.65					35.86	37.18	-1.85587
					26.95			34.33				ht igg 1	40.63		3.6197
					26.01	26.6033		34.72	34.57				37.45
			LT REST1		26.09			35						39.04
					26.15			35.11
					26.23	26.16	0.73	34.76	34.96	-0.06
			LT REST 2		26		0.6	35.89		1.04		lt rest 1	36.1
					26.01			35.29					34.89
					25.95	25.99	0.66	36.08	35.75	0.78			37.6	36.85	-2.71539
			LT IGG 1		25.59		0.63	35.23		0.58		lt igg 1	39.04		6.56773
					25.39			34.85					40.09
					25.31	25.43		34.97	35.02				35.4	39.57
			LT IGG 2		25.29			35.17				lt rest 2	39.06
					25.42			34.71					36.04
					25.25	25.32		35.02	34.97				38.87	38.97	-3.22449
												lt igg 2	40.46		9.34693
													42.24
													43.87	42.19
	LT= TERC+TERT overexp

## Sheet: HT1080 EZH2
					0- -300			GAPDH					CCDN2 (positive control)
			HT1080 EZH2 2		20.41			32.166				ht ezh2 2	29.92
					20.351			32.193					30.08
					20.511	20.424	-1.267	32.266	32.208	0.265			30.2	30.06	-0.675867
			ht1080 IgG 2		21.351		2.406	31.83		0.832		ht igg 2	30.76		1.59756
					22.493			31.759					31.07
					21.228	21.691		32.24	31.943				30.39	30.74
			HT1080 Input		21.685			32.217
					21.567			33.663
					21.673	21.642		31.68	32.52
			LT ezh2 1		25.36			33.82				lt ezh2 2	29.98
					25.13			33.13					29.58
					25.18	25.223	-0.711	33.247	33.399	0.436			29.41	29.6567	-0.673333
			LT IgG 1		25.85		1.637	32.55		0.739		lt igg 2	30.51		1.59475
					25.95			33.318					30.38
					26.01	25.934		33.021	32.963				30.09	30.33
			LT input		20.739			32.604
					20.501			32.23
					20.814	20.685		31.814	32.216
					0- -300bp			GAPDH			CCND
			HT1080 EZH2		19.341			35.07			30.7713
					19.264			33.72			30.5002
					19.249	19.28	-1.55754	33.32	33.52	4.25749	32.0717	30.6357	-1.57516
			LT EZH2		30.02		2.94351	34.14		0.0522838	33.15		2.97969
					30.52			34.21			31.66
					30.4	30.3133	-0.206667	34.46	34.27	0.672206	33.45	32.75	-0.847172
			HT1080 IgG		20.75		1.15402	29.37		0.627546	32.2098		1.79897
					20.719			31.61			32.212
					21.057	20.84		29.16	29.26			32.2109
			LT IgG		30.52			33.15			33.16
					30.45			35.65			34.04
					30.59	30.52		34.05	33.6		31.32	33.6
			HT1080 Input		31.48			31.09			29.77
					31.07			31.34			29.99
					31.19	31.25	27.9294	30.34	30.92		29.44	29.73
			LT Input		31.16			30.43			29.89
					31.03			31.17			29.49
					30.89	31.03	27.7067	30.42	30.67		29.03	29.47
					0- -300bp			GAPDH					CCDN2
			HT EZH2		20.881			34.95				HT EZH2	32.26
					20.992			34.6					31.02
					21.044	20.97	-1	34.89	34.81	0.25			31.5	31.26	-0.81
			HT IGG		22.086		2	34.65		0.84		HT IGG	32.7		1.75321
					22.014			34.33					32.33
					21.821	21.97		34.72	34.57				31.16	32.07
			LT EZH2		25.32			35.38				LT EZH2	35.01
					25.25			36.02					37.16
					25.26	25.27	-0.05	37.2	36.2	1.23			37.03	37.09	-0.4
			LT IGG		25.29		1.03	35.17		0.43		LT IGG	37.49		1.31951
					25.42			34.71					36.3
					25.25	25.32		35.02	34.97				38.69	37.49
			HT1080 Input		21.6847
					21.5675
					21.6732	21.6418
			LT input		20.7394
					20.5013
					20.8136	20.6848
	LT= TERC+TERT overexp

## Sheet: MDAMB OF REST
												OF=GTR Oligo Fed= LT
		UT1													OF rep1 (LT)
			0-300BP			GAPDH			SYNAPSIN (POSITIVE control)						0-300BP			GAPDH			SYNAPSIN
		rest	35.2577			32.3082			28.6995					rest	29.933			32.5067			25.6212
			34.606			31.8926			28.5703						30.0727			32.2323			25.5073
			34.5748	34.8128	-1.83748	32.7975	32.3328	0.140748	28.3946	28.5548	-0.392414				29.451	29.8189	-0.625455	33.1394	32.3695	0.895986	25.4727	25.5337	-1.54357
		igg	36.6003		3.57384	31.957		0.907049	28.946		1.31259			igg	30.3367		1.5427	31.5391		0.53738	26.8807		2.91514
			36.7003			32.427			28.9485						30.2736			31.8966			27.0213
			34.6673	36.6503		0	32.192		28.7106	28.9472					30.7227	30.4443		31.4079	31.4735		27.3299	27.0773
		UT2													OF rep 2 (LT)
			0-300BP			GAPDH			SYNAPSIN						0-300BP			GAPDH			SYNAPSIN
		rest	20.1897			29.4532			27.8542					rest	29.3554			21.7756			30.2933
			20.269			29.3497			27.9885						29.5825			22.1501			29.775
			20.6796	20.3795	-1.42228	28.8506	29.2178	-0.396466	28.4534	28.0987	-0.757697				29.2927	29.4102	-0.62317	21.6631	21.8629	0.119259	29.0294	29.6992	-0.403001
		igg	21.7578		2.68009	29.6765		1.31628	28.9376		1.69079			igg	30.1773		1.54026	21.9252		0.920661	30.2676		1.32226
			21.7036			29.4608			28.7752						29.9255			21.6536			30.2707
			21.9438	21.8017		29.7056	29.6143		29.0034	28.8564					29.9972	30.0334		21.6523	21.7437		29.7684	30.1022
		UT3													OF rep 3 (LT)
			0-300BP			GAPDH			SYNAPSIN						0-300BP			GAPDH			SYNAPSIN
		rest	20.5594			27.4569			0					rest	21.0782			28.1089			29.0864
			20.5548			27.417			27.4085						21.2121			27.6882			28.5951
			20.4296	20.5146	-1.85513	27.4186	27.4308	0.567796	26.6018	27.0052	-8.03111				21.2681	21.1861	-0.890989	27.8213	27.8728	0.697331	28.4015	28.6943	-0.807454
		igg	22.4427		3.61784	26.7248		0.674647	34.6644		261.581			igg	22.116		1.85445	27.351		0.616712	30.0067		1.75012
			22.3937			26.8472			35.4082						22.0742			27.1783			29.233
			22.2729	22.3698		27.0172	26.8631		34.7546	35.0363					22.0411	22.0771		26.9972	27.1755		29.2657	29.5018
										hTERT promoter	3.57384	3.61784	2.68009	1.5427	1.85445	1.54026
										GAPDH (-ve control)	0.907049	0.674647	1.31628	0.53738	0.616712	0.920661

## Sheet: MDAMB OF EZH2
Replicate 1
	0-300		IgG		delCT	OVER RESP iGg		GAPDH		IGG				CCND2		igg
OF (LT)	33.0432	33.4207	33.0694	33.1286	0.292053	0.816739		32.5067		31.5391				24.7167		25.178
	33.4452		33.2752					32.2323		31.8966				24.5567		25.2242
	33.7735		33.0412					33.1394	32.3695	31.4079	31.4735	0.895986	0.53738	24.5772	24.6169	25.244	25.2154	-0.598485	1.51413
UT1	31.6401	31.6715	33.8344	33.8658	-2.19431	4.5767		33.7925		31.8431				24.5284		24.7839
	31.7004		34.2126					34.1164		31.5342				24.5346		24.7003
	31.674		33.5504					33.7888	33.8992	30.8647	31.414	2.48522	0.178597	24.4774	24.5135	24.9074	24.7972	-0.283746	1.21735
Replicate 2
OF (LT)	32.6224	32.4091	32.2196	32.1593	0.249729	0.841054		GAPDH		IGG				CCND2		igg
	32.4405		32.1393					30.7947		30.3367				29.933		30.3367
	32.1642		32.1191					30.137		30.2736				30.0727		30.2736
UT2	29.6821	29.6566	32.6221	32.4088	-2.75218	6.73733		30.9241	30.6186	30.7227	30.4443	0.174278	0.886211	29.451	29.8189	30.7227	30.4443	-0.625455	1.5427
	29.6339		32.4402					30.3624		31.5391				35.8247		36.6003
	29.6537		32.1639					31.4577		31.8966				36.154		36.7003
								31.2818	31.3697	31.4079	31.4735	-0.103807	1.07461	37.0255	35.9894	34.6673	36.6503	-0.660931	1.5811
Replicate 3
	0-300		igg		delCT	OVER RESP iGg		GAPDH		IGG				CCND2		igg
OF (LT)	35.9699		36.6003					33.6604		32.3082				31.2928		31.8431
	34.8907		36.7003					33.4034		31.8926				30.6286		31.5342
	35.4827	35.7263	34.6673	36.6503	-0.924032	1.89741		33.8105	33.6248	32.7975	32.3328	1.29202	0.408379	30.5761	30.8325	31.8647	31.7473	-0.914866	1.88539
UT3	20.509		21.7578					29.4766		29.6765				24.5407		24.9875
	20.406		21.7036					28.9069		29.4608				24.4032		25.0037
	20.2739	20.3963	21.9438	21.8017	-1.40547	2.64904		29.2428	29.2088	29.7056	29.6143	-0.405552	1.3246	24.4921	24.4787	24.7491	24.9134	-0.434755	1.35168
						hTERT promoter	4.5767	6.73733	2.64904	0.816739	0.841054	1.89741
						GAPDH (-ve control)	0.178597	1.07461	1.3246	0.53738	0.886211	0.408379
OF=GTR Oligo Fed= LT

## Sheet: HCT TEL TRIM REST
tel = telomere trimming( telomere short)= ST
ut= wt=lt			0-300			gapdh			synapsin (positive control)
		hct ut rest	33.249			32.7921			35.3539
			33.1188			34.0062			37.1021
			32.5642	32.9774	-0.369054	35.1651	34.5856	0.169851	34.16	34.7569	-3.79122
					1.29151			0.888935			13.8443
		hct ut igg	32.8913			35.2523			38.1994
			33.1608			43.6597			38.8969
			33.9872	33.3464		33.5793	34.4158		0	38.5481
			0-300			gapdh			synapsin
		hct TEL rest 1	33.1202			38.7111			33.6145
			32.1307			36.9352			33.1578
			31.602	31.8664	-0.8387	38.2332	38.4721	1.20035	32.8512	33.2078	-2.63008
					1.78844			0.435169			6.1906
															st	st	st	lt	lt	lt
														0-300	2.40008	1.75997	1.78844	1.29151	0.765359	0.619273
		hct igg 1	32.4325			37.4859			36.0545					gapdh	0.303298	0.433204	0.435169	0.888935	0.78	1.40088
			32.9776			37.0576			37.6898
			31.9112	32.7051		0	37.2718		35.6214	35.8379
			0-300			gapdh			synapsin
		tel rest 1	30.7445						29.6509
			30.6678			38.2519			29.6275
			30.7102	30.7075	-1.26308	38.5612	38.4065	1.52552	29.2935	29.524	-6.12446
					2.40008			0.347354			69.7664
		tel igg 1	32.855			0			35.7149
			31.9809			37.1522			35.582
			31.9603	31.9706		36.6099	36.881		37.0769	35.6484
			0-300			gapdh			synapsin
		tel rest 2	31.6039			0			29.97
			31.3581			39.9791			30.2035
			31.3967	31.4529	-0.815552	39.0321	39.5056	1.20688	29.918	30.0305	-1.31339
					1.75997			0.433204			2.48524
		tel igg 2	31.8339						31.1002
			32.5862			38.4595			31.3341
			32.3853	32.2685		38.1379	38.2987		31.5974	31.3439
			0-300			gapdh			synapsin
		hct ut rest	31.9582			37.638			29.6073
			32.1429			36.2568			29.6834
			31.3052	32.0506	0.691352	36.9861	37.312	-0.486332	29.8508	29.7138	-3.31247
					0.619273	0		1.40088			9.93464
		hct ut igg	31.3757			0			33.2263
			31.5251			37.6049			33.1952
			31.1769	31.3592		37.9918	37.7983		32.6574	33.0263
			0-300			gapdh			synapsin
		hct ut igg	23.5689			35.2523			34.4452
			23.4865			43.6597			32.2261
			23.5281	23.5279		33.5793	34.4158		35.1461	34.7956
		hct ut rest	23.8678			34.7921			32.8148
			24.0586			34.3062			32.4306
			23.8146	23.9137	0.385791	35.1651	34.7545	0.338668	34.0744	33.1066	-1.68905
					0.765359			0.790771			3.22443

## Sheet: HCT TEL TRIM EZH2
			0-300			gapdh			ccnd2
		ezh2	33.4269			31.9181			32.1544
			32.9988			31.5901			32.1604
			34.403	33.2129	-0.133526	30.6475	31.1188	3.53549	32.2974	32.2041	-2.85357
		igg	32.8913		1.09697	27.6372		0.0862406	36.1265		7.22787
			33.1608			27.6361			35.3661
			33.9872	33.3464		27.4767	27.5833		34.7492	35.0577
			0-300			gapdh			ccnd2
		ezh2 1	31.1439			38.7111			30.0587
			31.5772						29.1887
			31.3789	31.3667	-0.499682	38.2332	38.4721	1.26156	29.5349	29.5941	-0.777024
		igg 1	33.1202		1.4139	37.4859		0.417093	30.1904		1.71359
			32.1307			36.9352			30.5215
			31.602	31.8664			37.2106		30.4015	30.3711
			0-300			gapdh			ccnd2
		tel ezh2 1	30.7333			38.5612			29.5291
			30.8723						30.1592
			30.8092	30.8049	-1.16567	38.6432	38.6022	1.72119	29.0288	29.5724	-1.01892
		tel igg 1	32.855		2.24337			0.303298	30.3634		2.0264
			31.9809			37.1522			30.4851
			31.9603	31.9706		36.6099	36.881		30.9254	30.5913
			0-300			gapdh			ccnd2
		tel ezh2 2	31.4957			39.0321			29.304
			30.1745			37.04			28.7903
			30.8463	30.8388	-1.42962	36.2355	36.6378	0.658704	29.1994	29.0979	-4.41182
		tel igg 2	31.8339		2.69375	0		0.633447	33.9078		21.2857
			32.5862			35.9791			0
			32.3853	32.2685		0	35.9791		33.1116	33.5097
			0-300			gapdh			ccnd2
		ezh2	30.5753			28.3997			31.1002						st	st	st	lt	lt	lt
			30.6439			28.4281			31.3341					hTERT promoter	2.24337	2.69375	3.17855	1.09697	1.4139	1.92786
			30.0174	30.4122	-0.947002	28.5651	28.4643	0.622018	31.5974	31.3439	-0.960216			GAPDH (-ve control)	0.303298	0.633447	0.921302	0.086241	0.417093	0.649761
		igg	31.3757		1.92786	28.163		0.649761	32.4373		1.9456
			31.5251			27.4226			32.2371
			31.1769	31.3592		27.9412	27.8423		32.238	32.3041
			0-300			gapdh			ccnd2
		tel ezh2	29.4653			33.0881			31.1911
			29.5623			33.5711			31.2698
			29.4951	29.5076	-1.66837	33.4632	33.3741	0.118253	31.6851	31.382	-2.9816
		tel igg	31.6506		3.17855	32.3816		0.921302	34.1802		7.8986
			30.9185			34.0612			34.3655
			30.9587	31.1759		33.3249	33.2559		34.545	34.3636

## Sheet: HCT TERC KD REST
	UT=LT=scr
	HTR SIL=TERC KNOCKDOWN=ST
				0- -300bp			GAPDH			SYNAPSIN positive control
			SCR REST 1	24.3315			42.162			36.7141
				24.5434			48.9625			39.089
				24.3387	24.4045	-1.04087	49.1082	49.0353	4.27617	37.2382	36.9762	-6.67162
			SCR IGG	25.3278		2.05747	44.3411		0.0516114	36.8213		101.943
				25.4924			45.1772			43.0494
				25.5159	25.4454		0	44.7592		44.2461	43.6478
			SCR INPUT	27.5375			50.3955			38.6894
				27.7898			NaN			37.2822
				28.1307	27.8193		40.3326	45.364		36.3365	36.8093
			HCT HTR SIL. REST 1	24.7798			51.6908			37.4927
				24.874			48.313			38.0164
				24.7149	24.7896	-1.86018	40.0375	50.0019	11.8188	39.818	37.7546	-0.827305
			HTR SIL. IGG	26.5003		3.63054	47.5691		0.000276807	36.9893		1.77437
				26.6775			38.6137			38.8825
				26.7715	26.6498		37.7523	38.183		39.8738	38.5819
			HTR SIL. INPUT	27.7818			NaN			35.0199
				28.157			53.8367			NaN
				28.7558	28.2315		48.0678	50.9522		37.5674	36.2936
				0- -300bp			GAPDH			SYNAPSIN
		HTR REST		32.1777			44.7347			34.7251
				32.014			45.4633			35.9589
				32.1889	32.1269	-2.01272	45.5283	45.2421	2.56079	37.3238	36.6414	-8.71849
		HTR IGG		34.0652		4.03542			0.169483			421.236
				33.5215			41.5997			45.5158
				34.8322	34.1396		43.7629	42.6813		45.2039	45.3599
		HTR INPUT		33.59			39.4683			26.6103
				33.4802						26.7604
				32.6267	33.2323		38.5201	38.9942		26.4092	26.5933
		HCT SCR REST		31.1165			43.3498			35.63
				31.2397			43.3705			35.72
				31.6957	31.3506	0.174697	43.4858	43.402	2.03846		35.675	-1.31227
		SCR IGG		31.6506		0.885953	41.1802		0.243424	43.51		2.48331
				30.9185			41.3655			37.5245
				30.9587	31.1759		41.545	41.3636		36.45	36.9873
		SCR INPUT		31.1911			37.529
				31.2698			39.3095
				31.6851	31.382		39.2235	38.6873
				0- -300bp			GAPDH			SYNAPSIN
			HTR INPUT	27.8874	27.6032		41.9031	41.7655		33.5596	33.2478
				27.5734			41.9849			32.936
				27.3487			41.4084
			HTRIGG	24.1982	24.2221			41.8173		36.5978	36.3748
				24.3274			41.9722
				24.1406			41.6624			36.1517
			HTR REST	23.2073	23.1476	-1.07447	43.7221	43.8475	2.03023	36.6018	35.3828	-0.99198
				23.1831		2.10595	43.9729		0.244816	34.1637		1.98891
				23.0524
			SCR INPUT	27.8434	27.9284		42.471	42.0849			36.5445
				28.1206			41.8058			37.7885
				27.8212			41.9778			35.3005
			SCRIGG	23.5689	23.5279			41.173		32.9456	33.472
				23.4865			41.4699			33.8093		-1.17407
				23.5281			40.8761			33.6611		2.25647
			SCR REST	23.8678	23.9137	0.385791		43.6924	2.51944	32.6531	32.2979
				24.0586		0.765359	43.735		0.17441	32.3552
				23.8146			43.6498			31.8855

## Sheet: HCT TERC KD EZH2
	UT=LT=scr
	HTR SIL=TERC KNOCKDOWN=ST
				0 - -300bp			GAPDH					CCND2 positive control
			HCT SCR EZH2	26.8489			53.9996				HCT SCR EZH2	29.1283
				26.7224			48.4256					29.276
				26.7176	26.763	1.31758	43.8479	48.7577	3.99853			28.6339	29.0127	-0.58785
			SCR IGG	25.3278		0.401207	44.3411		0.0625636		SCR IGG	30.3152		1.50301
				25.4924			45.1772					29.1216
				25.5159	25.4454		0	44.7592				29.365	29.6006
			HCT SCR INPUT	26.1062			50.341
				26.1104			46.8767
				26.0802	26.0989		41.1292	48.6088
			HCT HTR SIL. EZH2	24.8354			45.4933				HCT HTR SIL EZH2	28.503
				24.7418			47.4225					28.7028
				24.7976	24.7916	-1.96269	41.4283	46.4579	6.57793			28.9151	28.707	-0.319257
			HCT HTR SIL. IgG	26.7961		3.89787	38.91		0.0104676		HTR SIL. IGG	28.8237		1.24769
				26.7177			40.86					29.3872
				26.7491	26.7543		45.48	39.88				28.8677	29.0262
			HCT hTR SIL. INPUT	24.7444			47.57
				25.5833			38.61
				25.9955	25.4411		37.75	38.18
				0- -300bp			GAPDH				CCND2
			SCR EZH2	26.0855	26.0591	0.53123	33.238			HCT SCR EZH2	NaN
				27.2432		0.691964	32.439				27.3571
				26.0327			33.5694	33.0821	-0.139141		27.8527	27.6049	-0.59004
			SCRIGG	25.5689	25.5279		33.1995		1.10125	SCR IGG	28.245		1.50529
				25.4865			33.1736				27.9451
				25.5281			33.2907	33.2213			28.3946	28.1949
			SCR INPUT	27.8434	27.9284		34.7405
				28.1206			32.6919
				27.8212			34.3598	34.5502
			HTR EZH2	21.0399	21.0079	-3.21414	33.1745			HCT HTR SIL EZH2	28.1389
				20.9263		9.28012	32.8816				28.0402
				21.0577			31.9767	32.6776	0.539516		27.7084	27.9625	-0.421362
			HTRIGG	24.1982	24.2221		32.5407		0.688002	HTR SIL. IGG	28.16		1.33919
				24.3274			32.2645				28.9159
				24.1406			31.6091	32.1381			28.0757	28.3839
			HTR INPUT	27.8874	27.7304		34.0736
				27.5734			33.9276
				27.3487			33.7726	33.9246
				0- -300bp			GAPDH				CCND2
			SCR EZH2	27.2909	27.1332	0.389552	32.3811			HCT SCR EZH2	38.2076
				27.1122		0.763367	32.3336				37.0473
				27.1542			31.596	32.1036	-0.283249		37.0026	37.025	-0.677719
			SCR IGG	26.825	26.7436		32.4456		1.21693	SCR IGG	37.4997		1.59961
				26.7141			32.1987				37.2865
				26.6918			32.5161	32.3868			38.3218	37.7027
			SCR INPUT	28.6534	28.6846		31.9984
				28.7166			32.481
				28.6837			32.0426	32.174
			HTREZH2	25.2865	25.2068	-2.66258	35.1746			HCT HTR SIL EZH2	27.5032
				25.2303		6.33163	34.417				32.7179
				25.1035			34.2374	34.3272	-0.632737		33.2229	32.9704	-3.2214
			HTR IGG	27.4691	27.8693		35.1253		1.5505	HTR SIL. IGG	36.2908		9.32693
				27.6976			34.7216				38.5161
				28.041			35.0329	34.9599			36.0928	36.1918
			HTR INPUT	28.6077	28.6891
				28.9603			40.4584
				28.7706
