# Supplementary material for: Telomeres control human telomerase (TERT) expression through non-telomeric TRF2
Source: eLife. 2025 Sep 30;14:RP104045. doi: 10.7554/eLife.104045 (PMC12483519; doi:10.7554/eLife.104045)
Supplement: Figure 4—source data 1. [file elife-104045-fig4-data1.xlsx]

## Sheet: ccr5 wt promoter tel facs 4B
			T1E11 is the clone name (used internally in lab) for CCR5 WT htert promoter cells
									Short telomere	1
									Long telomere	1.36969
			unstained	stained (FITC)
		t1e11 short	5914	40854		34940
		t1e11	6116	53973		47857	1.36969

## Sheet: TRF2 ChIP 4C
		WT promoter Insert scrambled control
				hTERT Gaussia Insert promoter				gapdh			TELOMERE
		WT prom TRF2		34.1				45.3			20.04
				33.39							19.41
				33.56	33.6833	-0.671667		45.35	45.32	0.201343	19.48	19.64	-2.08118
		wt prom igg		34.96		1.59291		45.32		0.869741	21.56		4.23152															t2g5 scr trf2	19	35.8232
											21.18
				33.75	34.355			44.92	45.12		22.44	21.72																		34.5054	35.1643	-0.866456
		wt prom input		31.38				34.66			21.2																	scr igg	20	35.2328		1.82318
				31.64							21.01																			36.7024
				31.45	31.49			34.88	34.77		20.65	20.95																		36.157	36.0307
																												scr input	21	35.1708
																														34.8751
																														35.7929	35.2796
																												t2g5 htr trf2	22	35.2866
				hTERT Gaussia Insert promoter				GAPDH			TELOMERE																			35.8503
		WT promTRF2		31.6418				34.01			15.38																				35.5685	-0.746508
				31.4482				34.49			15.11																	htr igg	23	36.4187		1.67773
				31.4816	31.5239	-0.619033		34.07	34.19	0.955	15.08	15.19	-3.35853																	36.017
		wt prom igg		32.4431		1.53585				0.515842	18.62		10.257																	36.5092	36.315
				31.7533				32.16			18.52																	htr input	24	34.7427
				32.2324	32.1429			34.31	33.235		18.51	18.55																		35.1043
																														35.4489	35.0987
				hTERT Gaussia Insert promoter							TELOMERE
		WT prom TRF2		35.1476				GAPDH			22.3385
				35.2461				32.29			22.7191
					35.1968	0.22678		32.46			22.8984	22.652	-0.753466
		wt prom igg		34.9947		0.85454		32.28	32.35	0.172685	23.4926		1.68584
				34.9454				32.08		0.88719	23.2752
					34.9701			32.46			23.4486	23.4055
		WT PROM INPUT		33.34				31.98	32.17		15.6444
				32.5				31.69			15.7512
					32.92			32.11			15.8765	15.7573
								32.04	31.95
					1.59291
					1.53585
					0.85454
		WT promoter Insert TEL SGRNA
				hTERT Gaussia				GAPDH			Telomere
		WT prom TEL SGRNA TRF2		34.25				34.87			16.33
								35.01			16.46
				34.16	34.1594	-1.34258		34.47	34.78	0.654284	16.33	16.37	-1.98451
		wt prom TEL SGRNA Igg		35.76		2.53604		34.05		0.635391	18.35		3.95728
								34.21			18.39
				35.5	35.502			34.12	34.13		18.34	18.36
				hTERT Gaussia				GAPDH			Telomere
		WT prom TEL SGRNA TRF2						38.35			15.95
				34.17				39.26			16.01
				34.22	34.1947	-1.10095		38.26	38.62	1.46359	15.93	15.96	-2.42702
		wt prom TEL SGRNA Igg				2.14496		36.53		0.362591	18.35		5.37781
				35.06				37.26			18.47
				35.53	35.2956			37.7	37.16		18.35	18.39
				hTERT Gaussia				GAPDH			Telomere
		WT prom TEL SGRNA TRF2						32.75			19.39
				32.37				30.46			19.3
				32.61	32.49			31.25	30.86	-0.652656	19.4	19.36	-1.32446
		wt prom TEL SGRNA Igg		32.57				31.45		1.57206	20.62		2.50439
				34.74				31.39			20.91
					33.655	-1.165		31.68	31.51		20.54	20.69
		wt prom TEL SGRNA Input				2.24233					20.68
								30.51			20.59
								29.8	30.15		20.43	20.57
					2.53604	2.30778
					2.14496	0.166229
					2.24233

## Sheet: H3K27ME3 ChIP  4D
		WT promoter Insert ut
				hTERT Gaussia Insert promoter					GAPDH
		WT prom ut H3		31.61					43.86
				33.14					43.23
				31.39	31.5				42.7	42.96
		wt prom ut H3K27me3		31.43					0
				32.26					43.94
				30.34	31.34	-0.154661			44.5	44.22	1.26
		wt prom ut input		31.84		1.11316			42.31		0.417544
				31.19					42.98
				30.88	31.3				41.64	42.31
				hTERT Gaussia Insert promoter					GAPDH
		wt prom ut H3K27me3		34.14					37.56
				33.78					35.11
					33.96	-0.57			34.89	35	2.67667
		WT prom ut H3		34.55		1.48452			32.51		0.156402
				34.51					32.44
					34.53				32.02	32.3233
				hTERT Gaussia Insert promoter					GAPDH
		WT prom ut H3		28.53					29.15
				28.33					29.19
				28.45	28.44				29.01	29.12
		wt prom ut H3K27me3		28.13					28.33
				28.13					28.32
				28.06	28.11	-0.33			28.12	28.26	-0.86
						1.25701					1.81504
		WT prom tel sgrna
				hTERT Gaussia					GAPDH
		WT prom tel sgrna H3k27me3		34.73					34.97
				34.04	34.39	-0.841262			33.31
				35.35	-0.841262	1.79162			33.76	34.01	1.63
		wt prom tel sgrna H3		35.13	1.79162				32.02		0.323088
				35.19	35.23				32.58
									32.55	32.38
				hTERT Gaussia					GAPDH
		WT prom hTR sil H3		32.45					31.32
				30.88					30.61
				30.39	30.64				31.1	31.01
		wt prom hTR sil. H3K27ME3		29.94					31.55
				29.97					31.21
				29.27	29.7267	-0.913333			31.54	31.43	0.42
		wt prom hTR sil. Input		31.66		1.88339			31.71		0.747425
				32.09					31.36
				30.07	31.87				31.51	31.53
				hTERT Gaussia					GAPDH
		WT prom tel sgrna H3k27me3		28.3					26.8704
				28.46					27.0962
				28.51	28.42	-1.11			27.0323	26.9996	0.770438
		wt prom tel sgrna H3		29.63		2.15846			26.1371		0.586239
				29.56					26.4773
				29.4	29.53				26.0731	26.2292
							1.79162
							1.88339
							2.15846	1.94449

## Sheet: Luciferase activity 4E
			Luminescence (a.u.)					Protein conc. (total)		normalised value		Fold change wrt resp UT	Fold change wrt WT UT
	WT promoter		6359
			6446	6402.5				0.931763		6871.38		1	1
	wt promoter tel short		2862
			2999	2930.5				0.688494		4256.39		0.619437	0.619437
			4292
	WT promoter		4707	4499.5				0.733415		6135			1
			3755
	wt promoter tel short		3881	3818				0.914933		4172.98		0.680193	0.680193
	WT promoter		5485
			5171	5328				0.825483		6454.4			1											21199
	wt promoter tel short		3988																					26754.9
			4426	4207				1.13831		3695.83		0.572606	0.572606											31321.5
																								4139.06
