# Supplementary material for: Telomeres control human telomerase (TERT) expression through non-telomeric TRF2
Source: eLife. 2025 Sep 30;14:RP104045. doi: 10.7554/eLife.104045 (PMC12483519; doi:10.7554/eLife.104045)
Supplement: Figure 5—figure supplement 1—source data 1. [file elife-104045-fig5-figsupp1-data1.xlsx]

## Sheet: TL RT PCR DOX HT1080 model  A
		20 ng and 10 ng template														20 ng and 10 ng template
		sample	TEL			36B4			del ct	del-delct	2^(-∆∆ct)	average						tel		36b4			del ct	del del ct	2^(-∆∆ct)
		Day 0 20 Tel	14.5435	15.0017		21.6024	21.547		-6.54528	0	1	1				Day 0 20 Tel		14.5435	14.6173	21.6024	21.547		-6.92967	0	1	1
			14.6911			21.3218												14.6911		21.3218
			15.7705			21.7167												15.7705		21.7167
		Day 0 10	20.0701	16.2913		22.2851	22.2776		-5.98623	0	1					Day 0 10ng	2	16.1978	15.402	22.6659	22.5572		-7.15526	0	1
26 10 22			15.0621			22.2784												15.4156		22.4486
			17.5205			22.2691												15.3884		24.2017
		Day 10 20	17.1878	16.6309		24.0164	24.1032		-7.47233	-0.927048	1.90138	2.63097				Day 10 20 ng	4	15.612	15.4751	23.7376	23.869		-8.39395	-1.46428	2.75927	3.67813
			16.6577			23.9704												15.5916		23.8609
			16.0471			24.3229												15.2216		24.0086
		Day 10 10	16.404	16.6111		25.0603	25.1802		-8.56915	-2.58292	5.99152					Day 10 10 ng	5	16.4003	16.2571	25.4333	25.6131		-9.35596	-2.20069	4.597
			16.3845			24.9428												16.1139		25.4484
			17.0447			25.5376												22.8354		25.9575
		Day 16-- 20ng	14.5468	14.8433		21.8423	21.9888		-7.14548	-0.600193	1.51592	1.58395				Day 16-- 20ng	7	14.9686	14.8199	22.0748	22.138		-7.31807	-0.388402	1.30894	1.13792
			14.4583			22.1353												14.6712		21.9634
			15.5249																	22.3757
		Day 16-- 10	16.2375	15.9139		22.5493	22.6243		-6.71042	-0.724193	1.65198					Day 16-- 10ng	8	15.9514	15.9481	23.0866	23.0548		-7.10671	0.0485531	0.966906
			15.6646			22.5245												15.9448		23.0231
			15.8395			22.799												16.8169		24.4803
							delta Ct	DEL DEL CT	Fold change							20ng template												10ng template
		Day 0	Tel	30ng	12.8871	12.5802	7.06035	0	1
					12.3998												TEL		del ct	del del ct	2^(-∆∆ct)	36B4				avg fold change			TEL		del ct	del del ct	2^(-∆∆ct)	36B4
					12.4538											D0	15.5616					23.1943						D0	15.7984					23.8024
				20ng	13.2077	13.1484	6.98667	0	1								16.2941	15.955	-7.22012			23.156	23.1752						15.8933	15.9033	-7.92595			23.9122	23.8293
					13.0357												16.0093					23.6917							16.0183					23.7733
					13.2018
			36B4	30ng	19.642	19.6405										D6	15.0111					22.2851						D6	15.6959					23.5639
					19.6196												14.5475	14.7191	-7.56847	-0.348347	1.2731	22.2778	22.2876			1.1222			15.578	15.6869	-7.88393	0.0420229	0.971292	23.5589	23.5709
					19.66												14.5987					22.2998							15.7868					23.5897
				20ng	20.1163	20.1351
					20.1389
					20.1501											D8	15.248					23.6969						D8	15.5377					23.9722
																	15.3682	15.545	-8.106	-0.885877	1.84789	23.6229	23.651			1.69284			15.142	15.3672	-8.54681	-0.620856	1.53779	23.9383	23.914
																	15.2525					23.633							15.4218					23.8315
		Day 6	Tel	30ng	15.9247	15.973	7.4015	0.341151	1.26677
					16.0153					1.38226
					15.979											D16 +	16.3111					24.5997						D16 +	16.8385					25.1656
				20ng	16.6499	16.6369	7.56948	0.582807	1.49776								16.3535	16.3927	-8.00241	-0.782286	1.71985	24.1993	24.3951			1.60317			16.4708	16.6961	-8.49785	-0.571899	1.48648	25.0271	25.194
					16.5334												16.5134					24.3863							16.7791					25.3893
					16.7275
			36B4	30ng	23.448	23.3745										D24	16.045					23.6109						D24	16.7444					24.7646
					23.2797												16.8769	16.4242	-7.11821	0.101915	0.931795	23.5626	23.5424			1.00862			16.8731	16.7732	-8.04424	-0.11829	1.08545	24.8142	24.8174
					23.3958												16.3507					23.4536							16.7021					24.8735
				20ng	24.2345	24.2064
					24.1461
					24.2386
		Day8	Tel	30ng	13.3913	13.2867	7.46746	0.407115	1.32603
					13.2205					1.38853
					13.2481
				20ng	14.1809	14.0745	7.52375	0.537074	1.45103
					13.9157
					14.1268
			36B4	30ng	20.9623	20.7541
					20.6228
					20.6772
				20ng	21.6489	21.5982
					21.4982
					21.6475
		Day 16+	Tel	30ng	13.6505	13.6825	7.33368	0.273333	1.2086
					13.6602					1.20915
					13.7367
				20ng	14.2787	14.1765	7.26132	0.274649	1.2097
					14.0322
					14.2185
			36B4	30ng	20.9809	21.0161
					21.0398
					21.0278
				20ng	21.4528	21.4378
					21.4498
					21.4108
		Day 24	Tel	30ng	16.0937	16.1146	6.96121	-0.0991438	0.933587
					16.0486					1.04655
					16.2014
				20ng	16.1417	16.1048	7.20018	0.21351	1.15951
					16.0611
					16.1117
			36B4	30ng	23.0045	23.0758
					23.023
					23.1998
				20ng	23.403	23.305
					23.2323
					23.2797
										0	1
										6	1.38226	1.1222	1.25223
										8	1.38853	1.87177	1.63015
										10	2.63097	3.15455	2.89276
										16+	1.58395	1.36094	1.47244
										16-	1.20915	1.60317	1.40616
										24	1.04655	1.00862	1.02758

## Sheet: TRAP dox ht1080  B
			Absorbance at 690 (neg. control adjusted)	Absorbance at 450 (neg. control adjusted)	Difference	Average	Fold change
		HT1080 ind Day0	0.0384	0.1892	0.1508	0.14865	1
			0.0387	0.1852	0.1465
		Day 10	0.042	0.3447	0.3027	0.319	2.14598
			0.0412	0.3765	0.3353
		Day 16--	0.039	0.2547	0.2157	0.22245	1.49647
			0.0404	0.2696	0.2292
		Day 24--	0.0387	0.1852	0.1465	0.18395	1.23747
			0.0398	0.2612	0.2214
		Day 0	0.0412	0.2052	0.164
			0.0407	0.2161	0.1754	0.1697	1
		day6	0.0399	0.3026	0.2627
			0.0404	0.3172	0.2768	0.26975	1.58957
		day 8	0.0412	0.3556	0.3144
			0.0427	0.3951	0.3524	0.3334	1.96464
		day 10	0.0403	0.4993	0.459
			0.0405	0.4201	0.3796	0.4193	2.47083
		day 16 ++	0.042	0.3447	0.3027
			0.0412	0.3765	0.3353	0.319	1.87979
		day 16--	0.041	0.2414	0.2004
			0.0412	0.2422	0.201	0.2007	1.18268
		day 24	0.0582	0.2693	0.2111
			0.0425	0.2544	0.2119	0.2115	1.24632
		Day 0	0.0421	0.2301	0.188
			0.043	0.239	0.196	0.192	1
		day6	0.0444	0.3699	0.3255
			0.0464	0.3687	0.3223	0.3239	1.68698
		day 8	0.0486	0.2694	0.2208
			0.045	0.2488	0.2038	0.2123	1.10573
		day 16 ++	0.0433	0.3363	0.293
			0.0434	0.347	0.3036	0.2983	1.55365
									Day 0	1	1	1	1	1	1
									day 2	1.01562	0.815104				0.91536
									day 4	1.55245	1.43516				1.4938
									day6	1.58957	1.68698				1.63827
									day 8	1.96464	1.10573				1.53519
									day 10	2.47083	1.37552	2.14598	2.53686	1.68402	2.04264
									day 16 ++	1.87979	1.55365				1.71672
									day 16--	1.18268		1.49647	1.31538	1.35535	1.33747
									day 24	1.24632	1.00313	1.23747			1.1623
