# Supplementary material for: Telomeres control human telomerase (TERT) expression through non-telomeric TRF2
Source: eLife. 2025 Sep 30;14:RP104045. doi: 10.7554/eLife.104045 (PMC12483519; doi:10.7554/eLife.104045)
Supplement: Figure 5—source data 1. [file elife-104045-fig5-data1.xlsx]

## Sheet: FACS tel length 5B
						median	FITC signal
						unstained		stained				fold change
				Day 0		6595		60688		54093		1
				day 10		12542		347211		334669		6.18692
				day 24		9296		89774		80478		1.48777

## Sheet: TRF2 ChIP 5C
	Back cells DAY 24--
					0-300			gapdh			TELOMERE
	back inp				30.2201			30.2043			31.7004
					30.0492			29.6157			31.7699
					29.8735			30.1729			31.1333
	back igg				31.0057	31.5554		29.0039	28.9475		31.7956	33.092
					32.224		2.23359	28.9269	1.23778		33.5335	1.8692
					31.4365			28.9117			33.9468
	back trf2				30.5996	30.396		28.6179	28.6397		31.9047	32.1896
					32.9872			28.45			33.1924
					30.1924			28.8513			31.4716
					0-300			gapdh			TELOMERE
					28.2726			33.3503			14.2304
	d24 trf2				28.3816			33.2734			13.922
					28.2789	28.3111	-1.82151	33.6694	33.431	33.431	14.0359	14.0628	-1.86809
					30.0436		3.53451	0		8.63481e-11	15.8089		3.6505
	d24 igg				30.2136			0			16.0528
					30.1404	30.1326		0	0		15.4565	15.9309
					31.5812			26.0179			16.0848
	d24 input				32.666			25.762			15.8773
					32.0954	32.1142		26.0443	25.9414		15.65	15.8707
	back input				30.2043			31.7004			16.0848
					29.6157			31.7699			15.8773
					30.1729	29.9976		31.1333	31.5346		15.65	15.8707
	back igg				29.0039			31.9047			15.8089
					28.9269			33.1924			16.0528
					28.9117	28.9475		31.4716	31.6882		15.4565	15.9309
	back trf2				27.6179			31.7956			14.2304
					26.85			33.5335			13.922
					26.8513	27.1064	-1.84109	33.9468	33.7402	2.05204	14.0359	14.0628	-1.86809
							3.58281			0.241143			3.6505
	DAY 10
				0-300		gapdh			Telomere
	rep1	DOX INPUT		26.6112	26.5927	33.8285			30.0612	29.9052
				26.6111		33.2089
				26.5558		33.5439			29.7492
		DOX IGG		26.6902	26.7034	33.2135	32.7618		31.5805	31.6151
				26.4802	0.983979	32.31	1.25218		31.6497	2.83156
				26.9397		47.3849			30.8833	)
		DOX TRF2		26.9261	26.7267	49.2154	32.4373		30.0007	30.1135
	rep2			25.5571		32.4694			30.2263
				26.5273		32.4053			50.9881
		DOX IGG		26.4425	26.2766	33.7663	32.6689		33.1321	34.1092
				26.269	0.867953	32.2302	0.90951		38.2648	6.1669
				26.2843		32.0102			35.0863
		DOX TRF2		26.2857	26.481	31.592	32.8057		30.5614	31.4847
				26.5351		33.2059
				26.6221		33.6193			32.408
	rep3			0-300		gapdh			telomere
		d10 inp		29.5872		27.0774		day 10 tf2	14.5463
				30.1629		26.9454			14.4964
				NaN		26.8312			14.3899	14.4775	-1.08575
		d10 igg		30.1168	30.167	39.3209	37.6251	day 10 igg	15.5754		2.12248
				30.2382	0.257202	36.9806	1.37391		15.6207
				30.1459		36.5739			15.4938	15.5633
		d10 trf2		32.149	32.126	36.9425	37.1668	day 10 input	14.8474
				32.3095		37.3911			14.8737
				31.9195		NaN			14.7817	14.8343
							0.983979
							0.867953
							0.257202
		day 0
				0-300			GAPDH				telomere
		D0 TRF2		37.3186			34.4357				17.4897
				35.8058			34.0263				17.4527
				35.4509	35.6284	-1.6338	34.7421	34.4013	-0.742312		17.5447	17.4957	-0.671413
		D0 IGG		37.1487		3.1033	33.8988		1.67285		18.1439		1.59263
				35.6831			41.9028				18.3251
				37.3756	37.2622		36.3885	35.1436			18.0325	18.1671
		D0 INPUT		33.6479			28.3523				16.0517
				33.7299			28.335				16.2431
				34.1	33.826		28.1589	28.2821			16.1374	16.1441
				0-300			GAPDH				telomere
		TRF2		34.8784			31.4728			day 0 trf2	14.4428
				35.5468			31.3581				14.4058
				35.4551	35.2934	-1.58265	30.926	31.2523	2.51129		14.4142	14.4209	-0.620102
		IGG 1		36.269		2.99519	28.6956		0.175399	day 0 igg	15.0832		1.53698
				37.4321			28.9417				15.0276
				36.9272	36.8761		28.5858	28.741			15.0123	15.041
		INPUT		36.2666			27.4439			day 0 input	14.1876
				34.7868			27.6024				14.4037
				34.5347	35.196		27.5656	27.5373			14.2449	14.2787
				0-300			GAPDH				telomere
		TRF2		33.8687			40.2945				33.0012
				33.9777			42.2204				35.637
				33.8723	33.9062	-1.42155	37.9874	41.2574	5.63828		33.1235	33.0624	-1.19326
		IGG 1		35.2707		2.67874	35.4311		0.0200774		34.6005		2.2867
				36.6235			33.8116				34.4964
				35.3849	35.3278		35.8072	35.6192			33.6699	34.2556

## Sheet: REST ChIP 5D
		DAY 24--
			0-300 bp			gapdh				SYNAPSIN
		day24 rest	31.3579			34.2225			DAY 24 REST	36.3842
			31.4177			34.9414				36.0707
23 10 21			31.3915	31.389	-1.37001	35.1713	34.7784	1.32702		36.2547	36.2365	-3.0916
		day 24 igg	32.719		2.58472	33.2989		0.398591	DAY 24 IGG	39.284		8.52441
			33.0839			33.4345				39.332
			32.4742	32.759		33.6207	33.4514			39.3684	39.3281
		day 24 input	30.7953			30.7437			DAY 24 INPUT	39.8204
			30.7287			30.3683				37.1931
			31.0272	30.8504		30.3024	30.4715			35.8506	37.6214
			peak			gapdh
										SYNAPSIN
		rest	29.2908						DAY 24 REST	27.1915
1 10 21			29.2178			36.8743				27.7278
			29.1995	29.236	-2.00713	35.8407	36.3575	-0.0961698		27.6612	27.5268	-1.08438
		igg	31.3114		4.01983			1.06893	DAY 24 IGG	28.5547		2.12047
			31.2395			36.0617				28.5262
			31.1785	31.2431		36.8456	36.4537			28.7527	28.6112
		input	30.0583			32.1757			DAY 24 INPUT	29.9928
			30.0226			32.2504				29.4697
			29.4827	29.8545		32.6991	32.3751			29.2112	29.5579
			0-300			gapdh				SYNAPSIN
		d24 rest	28.9929			36.3649			d24 rest	30.843
10 11 21			29.1548							29.9751
			28.993	29.0469	-1.4706	35.2574	35.8111	2.02173		29.8782	30.2321	-1.63188
		d24 igg	30.3869		2.77137	34.098		0.246263	d24 igg	31.9732		3.09916
			30.5495			33.8091				32.0053
			30.616	30.5175		33.4611	33.7894			31.6134	31.864
		d24 input	32.672			24.6997			d24 input	33.0115
			32.4187			24.8195				32.7655
			32.2486	32.4464		25.0975	24.8722			32.8203	32.8658
					2.58472			0.398591				8.52441
					4.01983			1.06893				3.09916
					2.77137			0.246263
		DAY 10
			0-300			GAPDH			synapsin
		D10 REST	30.2586			37.8582			29.8562
			30.9103			35.9306			29.7997
16 7 22			30.6907	30.6199	-0.0788678	37.222	37.5401	2.20024	29.5432	29.7331	-5.47723
		D10 IGG	31.0431		1.05619	0		0.217601	35.5483		44.5461
			30.3373			35.9388			34.3178
			30.7157	30.6987		34.741	35.3399		35.7647	35.2103
		D10 INPUT	30.361			28.2213			30.3597
			30.8803			28.0646			29.9307
			31.1424	30.7946		27.3646	27.8835		29.8575	30.0493
			0-300			GAPDH			synapsin
		D10 REST				35.1431			34.2897
			34.6939			34.9295			32.7863
			34.9478	34.8209	-0.0437675	34.233	35.0363	1.33467	32.5641	32.6752	-3.68606
		D10 IGG	35.169		1.0308	33.6784		0.396483	36.6387		12.871
			34.8485			34.3246			36.214
			34.5763	34.8646		33.1019	33.7016		36.2309	36.3612
		D10 INPUT	35.0143			25.7691			24.5904
			34.4589			25.539			24.7519
			34.6686	34.7139		25.4259	25.578		24.6359	24.6594
			0-300			GAPDH			synapsin
		D10 REST	37.1655			31.0354			29.0783
			36.1927			30.9776			29.0604
			36.0622	36.4735	-0.402641	30.2074	30.7401	0.760519	29.2953	29.1447	-5.8821
		D10 IGG	36.269		1.32193	29.7101		0.590284			58.9778
			37.4321			30.48			35.9375
			36.9272	36.8761		29.7488	29.9796		34.116	35.0268
		D10 INPUT	36.2666			22.869			29.3921
			34.7868			22.8522			30.1501
			34.5347	35.196		22.8639	22.8617		29.6766	29.7396
					1.05619			1			44.5461
					1.0308			0.396483			58.9778
					1.32193			0.590284			12.871
	DAY 0
			0-300			GAPDH				synapsin
		D0 REST	37.4081			33.8988				30.0636
			35.9022			41.9028				30.4674
16 7 22			35.5404	35.7213	-1.54086	33.3885	33.6436	2.45559		30.7353	30.4221	-1.76492
		D0 IGG	37.1487		2.90968	31.5501		0.182303		32.3044		3.39854
			35.6831			30.882				31.9999
			37.3756	37.2622		31.132	31.188			32.2567	32.187
		D0 INPUT	33.6479			28.3523				31.2978
			33.7299			28.335				30.7573
			34.1	33.826		28.1589	28.2821			31.4155	31.1569
			0-300			GAPDH				synapsin
		REST	33.728			32.1818			day 0 rest/syn	31.3601
			33.387			32.2342				31.2009
12 7 22			33.5454	33.5535	-1.51214	31.5763	31.9974	3.25644		31.2805	31.2805
		IGG 1	34.285		2.85232	28.6956		0.104644	day 0 igg/syn	33.575		-2.32783
			35.0912			28.9417						5.02049
			35.04	35.0656		28.5858	28.741			33.6416	33.6083
		INPUT	35.67			27.4439			day 0 input/syn	29.6567
			35.5641			27.6024				29.4914
			35.0109	35.415		27.5656	27.5373			29.2402	29.4628
			0-300			GAPDH				synapsin
		REST	30.2806			31.1932				34.5878
			30.1569			31.474				37.6308
			30.0002	30.1459	-2.03293	31.0755	31.2476	0.149492		35.2251	34.9064	-1.59694
		IGG	32.1324		4.09236	31.0692		0.901568		36.2411		3.02501
			32.0639			31.4166				38.4826
			32.3403	32.1789		30.8085	31.0981			36.7656	36.5034
		INPUT	31.2847			23.9422				26.0747
			30.5996			24.0075				26.0308
			29.9559	30.6134		23.8641	23.9379			26.0489	26.0514
					2.90968							3.39854
					2.85232			0.182303				5.02049
					4.09236			0.104644				3.02501
								0.930034

## Sheet: EZH2 ChIP  5E
		DAY 24 --
		0-300 bp			gapdh			CCND2
	BACK INP	29.195			32.4668			32.9078
		29.2725			34.1792			34.2008
11 1 20		29.1251	29.1975		32.051	32.899		30.4287	32.5124
	IGG	32.9349			33.2303			33.2852
		32.1179			32.4774			33.6547
		33.165	33.05		32.2024	32.6367		34.9885	33.9761
	EZH2	30.0583			31.8209			31.3653
		29.8895		7.49891	32.8123		1.09832	32.02		3.10142
		30.482	30.1433	-2.90668	33.182	32.5014	-0.135294	33.6442	32.3432	-1.63293
		0-300 bp			gapdh			CCND2
11 1 20	BACK INP				31.2443			31.7008
		34.6569			31.7667			33.1337
		34.8926	34.7747		29.7851	30.932		32.0085	32.281
	IGG				29.6078			33.1206
		36.0617			30.065			31.6259
		36.8456	36.4537		30.8815	30.1848		32.3066	32.3511
	EZH2	32.1757			30.5229			30.852
		32.2504		16.8957	31.9622		0.795754	31.7683		2.45416
		32.6991	32.3751	-4.07858	30.5058	30.5144	0.329606	31.2597	31.0558	-1.29523
		0-300 bp			gapdh			CCND2
	ezh2	30.8235			30.8996			34.3147
		30.7075			NaN			35.0053
1 10 21		31.7218	31.0843	-3.16741	32.4097	31.6546	3.47922	36.3917	34.3147	-0.549937
	igg	33.13		8.98433	28.1795		0.0896706	35.169		1.46402
		36.5813			28.268			34.8485
		33.0438	34.2517		28.0788	28.1754		34.5763	34.8646
	input	25.1296			32.2028			35.0143
		25.1273			34.4148			34.4589
		24.993	25.0833		32.058	32.1304		34.6686	34.7139
				7.49891			1.09832			2.45416
				16.8957			0.795754			1.46402
				8.98433			0.0896706			3.10142
		DAY 10++
		0-300 bp			gapdh				CCND2
	day10 ezh2	32.1059			35.9276			DAY 10 EZH2	30.9334
		32.4118			35.5868				30.2642
23 10 21		31.6937	32.0704	-0.278884	36.1056	35.8733	2.27469		30.8778	30.6918	-2.58273
	day10 igg	32.3646		1.21326			0.206657	DAY10 IGG	33.5603		5.99073
		32.4084			33.7944				33.0038
		32.275	32.3493		33.4029	33.5986			33.2595	33.2745
	day 10 input	31.8017			26.9328			DAY 10 INPUT	24.6902
		31.3776			26.7041				24.8955
		31.2894	31.4896		26.6406	26.7592			24.7797	24.7885
		0-300 bp			gapdh				CCND2
	day10 ezh2	33.8895			34.2276			DAY 10 EZH2	30.5778
		34.0181			34.9323				30.5002
11 1 20		34.082	33.9965	1.82635	37.3986	34.5799	0.591348		30.3836	30.4872	-1.54477
	day10 igg	31.8664		0.281977	33.0505		0.663723	DAY10 IGG	32.0746		2.91757
		32.7988			34.4533				31.8595
		31.8453	32.1702		34.4619	33.9886			32.1617	32.0319
	day 10 input	32.6039			31.0839			DAY 10 INPUT	30.7145
		32.3071			33.0058				31.0612
		32.8012	32.5707		31.8419	31.9772			31.0179	30.9312
		0-300			GAPDH				CCND2
	D10 EZH2	34.3866			35.4276			DAY 10 EZH2	31.9903
		35.1692			42.2286				32.3027
		33.6076	34.3878	-0.677815	36.4986	35.9631	0.623253		32.9166	32.4032	-2.7429
16 7 22	D10 IGG	34.285		1.59972	0		0.649206	DAY10 IGG	35.1429		6.69416
		35.0912			35.9388				35.1492
		35.04	35.0656		34.741	35.3399			38.8243	35.1461
	D10 INPUT	35.67			28.2213			DAY 10 INPUT	26.8274
		35.5641			28.0646				26.9384
		35.0109	35.415		27.3646	27.8835			26.8484	26.8714
				1.21326			0.206657				5.99073
				0.281977			0.663723				2.91757
				1.59972			0.649206				6.69416
		DAY 0
		0-300 bp			gapdh				ccnd2
	EZH2 IND UT	30.6709			32.9533				29.6959
		30.8216			31.3322				29.3873
11 1 20		NaN	30.7462	-0.980423	31.6317	31.9724	3.34697		30.5725	29.8852	-1.25824
	IGG	31.5306		1.97304	28.8554		0.0982793		31.6696		2.39204
		31.3574			28.5425				31.9814
		32.292	31.7266		28.4783	28.6254			29.7794	31.1435
	HTERT INP	32.801			30.0649				33.2814
		32.2337			29.8582				32.5194
		32.0746	32.3698		29.9373	29.9535			31.8553	32.552
		0-300			GAPDH				ccnd2
	D0 EZH2	42.1887			33.8988				31.8252
		34.7921			41.9028				30.5466
16 7 22		35.5495	35.1708	-2.09137	36.3885	35.1436	2.63993		30.2304	30.3885	-1.59998
	D0 IGG	37.1487		4.26153	33.5787		0.160436		31.9295		3.03138
		35.6831			32.4937				34.6156
		37.3756	37.2622		32.5137	32.5037			32.0474	31.9885
	D0 INPUT	33.6479			28.3523				26.4631
		33.7299			28.335				26.1157
		34.1	33.826		28.1589	28.2821			26.0564	26.2117
		0-300			GAPDH				ccnd2
	EZH2	35.794			32.1827			day 0 ezh2ccnd	28.5923
12 7 22					33.5021				28.4522
		36.3009	36.0474	-0.828648	33.3055	32.9967	4.25574		29.3819	28.8088	-2.99476
	IGG 1	36.269		1.77602	28.6956		0.0523472	day0 igg2 ccnd	31.3847		7.971
		37.4321			28.9417				31.8052
		36.9272	36.8761		28.5858	28.741			32.2208	31.8035
	INPUT	36.2666			27.4439			day0 input ccnd	24.1864
		34.7868			27.6024				24.2842
		34.5347	35.196		27.5656	27.5373			24.8751	24.4486
											2.39204
				1.97304			0.0982793				3.03138
				4.26153			0.160436				7.971
				1.77602			0.0523472

## Sheet: H3K27me3 ChIP  5F
		DAY 24 --
				0-300bp		gapdh
		back inp		30.5112		32.2182
				31.1311		32.0022
				31.9549		31.8493
8 10 20		back h3		31.0033	30.6442	31.228	31.0854
				30.3954	3.1053	31.136	1.58665
				30.5339		30.8921
		back 27me3		29.1659	29.0095	29.7981	30.4194
				29.0653		29.8454
				28.7973		31.6146
				0-300bp				gapdh
		DOX INPUT		45.3575	45.3868			41.0658	39.925
				43.8706				38.7841
13.3.20				45.4161				45.3575
		DOX H3		41.0658	39.1826			36.9927	37.3506
				38.7841				37.2514
				39.5811				37.8077
		DOX K27ME3		36.9927	37.3506	-1.83199		37.9989	37.6981	0.347535
				37.2514		3.56029		37.3973		0.785926
				37.8077				30.4943
				0-300 bp		gapdh
		back input		32.2182	32.0232	31.7004	31.5346
				32.0022		31.7699
				31.8493		31.1333
8.10.20		back h3		31.228	31.0854	31.9047	32.1896
				31.136		33.1924
				30.8921		31.4716
		back k27		29.7981	30.4194	31.7956	33.092
				29.8454	-0.665984	33.5335	0.902418
				31.6146	1.58665	33.9468	0.534989
					3.1053
					3.56029
					1.58665
	DAY 10
				0-300		gapdh
	file name dox chipm 5/3/21	D10 INPUT		29.2129		38.9935	38.8258
				29.0648		38.658
				28.6986		36.7364
		D10 H3		27.2568	27.2609	35.9064	36.1567
				27.3501		36.6411
				27.1759		35.9224
		D10K27		27.8068	27.8217	53.3033	37.7173
				27.8912		37.4639
				27.767		37.9707
					0.560747
					0.677951		0.339002
	rep2
				0-300bp		gapdh
		d10 inp		37.9989	35.2969	41.0658	41.7358
				37.3973		38.7841
				30.4943		45.3575
		d10 h3		30.87	31.2083	36.9927	37.3506
				30.6284	0.443308	37.2514	0.347535
				32.1264	0.735446	37.8077	0.785926
		d10 27me3		32.7602	31.6516	37.9989	37.6981
				31.2264		37.3973
				30.9682		30.4943
	rep3			275		gapdh
		d10 inp		26.2107		36.967
				26.3888		34.7632
				26.8606		34.5865
		d10 h3		24.0913	24.0427	36.1181	36.2763
				24.0821	1.03648	36.4345	2.78322
				23.9548		37.5149
		d10 k27me3		23.9622	23.991	35.9155	35.4931
				24.0295		35.3788
				23.9814		35.1849
					0.677951
					0.735446
					1.03648
			day 0
				0-300			GAPDH
			H3K27ME3	36.0071			31.9828
				35.6032			32.3214
12 7 22				35.24	35.6168	-0.868201	32.4583	32.2542	1.06931
			H3	36.4691		1.82539	32.089		0.476546
				37.3388			31.1272
				35.6469	36.485		31.2425	31.1849
			INPUT	36.2666			27.4439
				34.7868			27.6024
				34.5347	35.196		27.5656	27.5373
				0-300			GAPDH
			INPUT	35.1807	34.9086		50.2052	47.3698
2 1 20				34.6365			47.7059
				47.3045			44.1983
			H3	33.9376	33.5583		37.2207	37.3954
				33.0845			37.5701
				33.6528			35.0345
			K27 ME3	31.5997	31.3348	-2.22346	39.367	39.3472	1.95175
				31.1198		4.67013	40.5676		0.258502
				31.285			38.1069
				0-300			GAPDH
			H3K27ME3	33.0088			34.5133
				32.6908			35.3529
				33.0286	32.9094	-2.30619	35.4682	35.1115	8.81883
			H3	34.9104		4.94575	26.2781		0.00221446
				35.0053			26.2342
				35.7311	35.2156		26.3655	26.2926

## Sheet: mRNA 5G
				GAPDH			TERT ENDO
		D0		17.234			23.121
				16.8819			23.596
				18.0167	17.058		23.2461	23.3585	6.30054
		D10		17.8483			19.7139
				17.6361			19.6161
				17.6087	17.6977		19.7018	19.6772	1.97956
		D24		17.458			21.6654		-4.32098	19.9869
				17.5202			21.8837
				17.6869	17.555		22.0071	21.8521	4.29703
									-2.00351	4.00976
				GAPDH			TERT ENDO
		D0		21.5033			26.2069																													0.0683073
				21.511			25.9406
				21.8572	21.6238		25.8725	26.0737	4.44989																									26.0067	4.38283	-1.56068
		D10		22.0432			21.304
				22.0837			21.9851
				22.4237	22.1835		20.9842	21.6446	-0.538971																									31.4244	9.24092	-6.61075
		D24		20.8637			23.2804		-4.98887	31.754																										97.7311
				20.6062			23.8788
				21.099	20.8563		23.078	23.4124	2.55607																									27.079	6.22273	-9.62893
									-1.89383	3.7162
				gapdh			tert endo
		d0 1		18.8064			24.7016																													2.94993
				18.6454			24.6612
				24.136	18.7259		24.6129	24.6586	5.93263																									33.0605	15.8517
		d10		18.6981			21.14
				18.674			21.2841
				18.9976	18.7899		21.162	21.1954	2.40546
		d24 2		19.0719			23.289		-3.52717
				18.6082			23.3421		11.5288
				18.7627	18.8143		23.1123	23.2478	4.43353
									-1.49909
									2.82665
