# Supplementary material for: Telomeres control human telomerase (TERT) expression through non-telomeric TRF2
Source: eLife. 2025 Sep 30;14:RP104045. doi: 10.7554/eLife.104045 (PMC12483519; doi:10.7554/eLife.104045)
Supplement: Figure 6—figure supplement 1—source data 1. [file elife-104045-fig6-figsupp1-data1.xlsx]

## Sheet: TL RT PCR DOX MDAMB231 A
		Tel
														TEL		36B4		delct (test-36B4)		del del ct (		FOLD CHANGE
		D0			14.7822	14.5006		14.6414				D0		14.6414		20.8029		-6.16156
				15.0225	14.9404	14.8554		14.9394						14.9394		21.9747		-7.03523
												D14		17.6413		23.0383		-5.39698	-6.16156	0.764582		0.588624
		D14		17.633	17.601	17.6898		17.6413						17.0395		24.0359		-6.99647	-7.03523	0.0387533		0.973496
				16.9476	18.0442	17.1313		17.0395
		36B4
		D0		20.7572	20.8323	20.8193		20.8029
				21.9547	21.8971	22.0722		21.9747
		D14		23.08	22.9989	23.0359		23.0383
				24.0926	24.0243	23.9909		24.0359
		Tel												TEL		36B4		delct (test-36B4)		del del ct (		FC
		D0			14.7822	14.5006		14.6414				D0		14.6414		20.8029		-6.16156
				15.0225	14.9404	14.8554		14.9394						14.9394		21.9747		-7.03523
		D10		13.3682	13.5341			13.4511				D10		13.4511		20.1813		-6.73019	-6.16156	-0.568624		1.48311
				13.2119	12.8026	12.1256		12.7133						12.7133		20.6168		-7.90344	-7.03523	-0.868214		1.8254
		36B4
		D0		20.7572	20.8323	20.8193		20.8029
				21.9547	21.8971	22.0722		21.9747
		D10		20.1813	20.5154	20.6362		20.1813
				20.5834	20.7565	20.5105		20.6168
		Tel												TEL		36B4		delct (test-36B4)		del del ct (		FC
		D0		16.0211	14.8156	14.6872		15.1746				D0		15.1746		21.8769		-6.70224
				15.0225	14.9404	14.8554		14.9394						14.9394		21.9747		-7.03523
		D8		15.5444	15.2878	15.1399		15.3241				D8		15.3241		22.3471		-7.02308	-6.70224	-0.320839		1.24906
				16.5244	15.7313	15.5792		15.945						15.945		23.1943		-7.24935	-7.03523	-0.214126		1.16
		36B4
		D0		21.8965	23.1454	21.8573		21.8769
				21.9547	21.8971	22.0722		21.9747
		D8		22.261	22.4882	22.2921		22.3471
				23.264	23.1309	23.1881		23.1943
		Tel												TEL		36B4		delct (test-36B4)		del del ct (		FC
		D0		16.0211	14.8156	14.6872		15.1746				D0		15.1746		21.8769		-6.70224
				15.0225	14.9404	14.8554		14.9394						14.9394		21.9747		-7.03523
		D4		15.2031	15.7497	15.4134		15.4554
				16.3329	16.3053	15.8946		16.1776				D4		15.4554		22.2082		-6.75276	-6.70224	-0.0505221		1.03564
														16.1776		22.8479		-6.67026	-7.03523	0.364963		0.776489
		36B4
		D0		21.8965	23.1454	21.8573		21.8769
				21.9547	21.8971	22.0722		21.9747
		D4		22.1337	22.2626	22.2283		22.2082							0	1	1
				22.7454	22.8123	22.9859		22.8479							4	1.03564	0.776489
															8	1.24906	1.16
															10	1.48311	1.8254
															14	0.588624	0.973496

## Sheet: TRAP DOX MDAMB231 B
				Absorbance at (690 -450nm)	Absorbance at (690 -450nm)	avg	neg control( abs 690-ab 450nm)	Negative control adjusted	neg control( abs 690-ab 450nm)	Fold change
			D0	1.4393	1.6229	1.5311	0.0577	1.4734	1.4734	1
			D4	1.657	1.4762	1.5666	0.0577	1.5089	1.4734	1.02409
			D8	2.1972	1.9371	2.06715	0.0577	2.00945	1.4734	1.36382
			-ve	0.0599	0.0555	0.0577	0.0577	0
				Absorbance at (690 -450nm)	Absorbance at (690 -450nm)		avg	neg control( abs 690-ab 450nm)	Negative control adjusted		Fold change
			D0	1.6878	1.4916		1.5897	0.4508	1.1389		1
			-ve	0.4697	0.4319		0.4508	0.4508	0
			D4	1.9974	2.2391		2.11825	0.4508	1.66745		1.46409
			D8	2.495	2.7191		2.60705	0.4508	2.15625		1.89327
			D10	2.9571	2.9748		2.96595	0.4508	2.51515		2.2084
			D14-	2.1277	2.1875		2.1576	0.4508	1.7068		1.49864
				Absorbance at (690 -450nm)	Absorbance at (690 -450nm)		avg	neg control( abs 690-ab 450nm)	Negative control adjusted		Fold change
			neg	0.0208	0.0224		0.0216	0.0216
			D0	0.7292	0.6889		0.70905	0.0216	0.68745		1
			D10	1.957	1.8762		1.9166	0.0216	1.895		2.75656
			D14-	0.8033	0.831		0.81715	0.0216	0.79555		1.15725
				day
				4	1.46409	1.02409
				8	1.36382	1.89327
				10	2.2084	2.75656
				14	1.15725	1.49864
