# Supplementary material for: Telomeres control human telomerase (TERT) expression through non-telomeric TRF2
Source: eLife. 2025 Sep 30;14:RP104045. doi: 10.7554/eLife.104045 (PMC12483519; doi:10.7554/eLife.104045)
Supplement: Figure 6—source data 1. [file elife-104045-fig6-data1.xlsx]

## Sheet: tel FACS 6B
						median	FITC signal
						unstained		stained				fold change
				Day 0		4811		417000		412189		1
				day 10		5178		953000		947822		2.29948
				day 14		11181		470000		458819		1.11313

## Sheet: trf2 6C
	DAY 0
			0-300				gapdh				TELOMERE
		d0 trf2	25.7118				33.8163				19.1851
r1			25.6509				33.0278				19.2208
			25.1406	25.5011	-1.49373		30.5751	33.4221	3.83488		19.2705	19.2029	-0.570877
		d0 igg	27.2987		2.81616		29.452		0.0700785		19.7347		1.48543
			28.2115				29.2964				20.0674
			26.6909	26.9948			30.0131	29.5872			19.5193	19.7738
		d0 input	27.0627				36.1125				15.7173
			26.7321				35.8099				15.4693
			26.9406	26.9118			37.143	36.3551			18.9023	16.6963			1.48543
															4.60398
			0-300				gapdh				TELOMERE				1.3477
r2		d0 trf2	30.1658								15.7906
			30.0385				38.4065				15.8754
			30.7468	30.317	-2.01324		38.4246	38.4156	-0.211594		15.9914	15.833	-2.20288
		d0 igg	32.4424		4.03687				1.15797		18.2158		4.60398
			32.2182								17.8855
				32.3303			38.6272	38.6272			18.0063	18.0359
		d0 inout	27.4239								18.1875
			27.4501				36.6623				18.1901
			27.426	27.4333				36.6623			18.2517	18.2098
			0-300				gapdh				TELOMERE
r3		d0 trf2	20.3869				26.826				14.9166
			20.3139				26.5687				14.2762
			20.2028	20.3012	-1.05698		26.5751	26.6566	0.0748541		14.6329	14.6086	-0.430495
		d0 igg	21.4263		2.08058		26.6678		0.949438		15.1111		1.3477
			21.3612				26.2883				15.0847
			21.2871	21.3582			26.7891	26.5817			14.9214	15.0391
DAY 10
			0-300 BP					Telomere				GAPDH
r1		D10 INPUT	28.155					26.4919				30.7332
			29.14					26.3938	26.46			31.0052	30.9424
			27.8492	28.3814				26.4942				31.0888
		D10 TRF2	27.3204					31.5077				37.1284
			27.6401					32.9574	32.4918	-1.80804			37.7205	-0.533422
			27.5182	27.4929	0.429138			33.0103		3.50167		38.3126		1.44736
					0.742705
		D10 IGG	27.0045					32.2175				37.9602
			27.3675					34.0428	34.2998			38.5476	38.2539
			26.8194	27.0638				34.5569
			0-300 BP					Telomere				GAPDH
r2		D10 INPUT	29.4695					26.77				32.3288
			29.5446	29.3231				26.5619	26.6081			31.9378	32.153
			28.9553					26.4923				32.1923
		D10 TRF2	30.3397					30.9876				38.5093
			30.1249	30.2473	0.392926			30.7787	30.814			38.4556	38.4824
			30.2774		0.761583			30.6756		-1.48279
										2.79488				1.2086
		D10 IGG	30.0085					31.9431				37.5744		0.432689
			29.7621	29.8544				32.2761	32.2968			36.7897	37.2738
			29.7926					32.6711				37.4574
			0-300 BP					Telomere				GAPDH
		D10 TRF2	21.9849					20.3119				28.4231
			21.9577					17.1315				28.5413
			21.8886	21.9437	0.0520918			17.3768	17.2541	-0.343689		28.3575	28.4406	1.60503
		D10 IGG	22.2892		0.964537			17.3959		1.269		26.9569		0.32873
			21.9107					17.1139				27.1397
			21.475	21.8916				17.7998	17.5978			26.4102	26.8356
										3.50167
										2.79488
										1.269
	DAY 14
			0-300				gapdh				telomere
r1		day 14 trf2	27.2245				39.8971				13.0548
			27.4325								12.9149
			27.2129	27.29	-0.227412			39.8971	3.77242		12.4511	12.8069	-2.96505
		d14 igg	27.4675		1.17073		35.0169		0.0731791		15.7827		7.80853
			27.4939				36.2598				16.1276
			27.5908	27.5174			37.0972	36.1246			15.4056	15.772
			0-300				gapdh				telomere
r2		day 14 trf2	28.7408				39.2508				14.6448
			28.472				37.6657				15.3304
			29.0306	28.7478	-0.628226			38.4582	3.07754		14.4258	14.8003	-1.38329
		d14 igg	29.3183		1.54566		35.1839		0.118459		16.3302		2.60863
			29.506				35.0486				16.1174
			29.3036	29.376			35.9095	35.3807			16.1032	16.1836
			0-300				gapdh				telomere				7.80853
r3		day 14 trf2	21.2719				28.0444				14.2605				2.60863
			21.2185				27.5601				14.3811				4.10583
			21.1837	21.2247	-0.426171		27.6019	27.7355	-0.133435		14.1748	14.2721	-2.03767
		d14 igg	21.7239		1.34366		28.0723		1.0969		16.4089		4.10583
			21.5631				27.6847				16.1205
			21.6656	21.6509			27.8498	27.8689			16.4	16.3098

## Sheet: REST 6D
	Day 0
			0-300 bp				GAPDH				SYNAPSIN
		REST	20.4108				27.0027				28.2366
			20.4811				27.0035				28.2871
			20.3681	20.42	-0.938191		26.9035	26.9699	0.388173		28.3872	28.3036	-0.372492
		IGG	21.4263		1.91612		26.6678		0.764097		28.7628		1.29459
			21.3612				26.2883				28.7589
			21.2871	21.3582			26.7891	26.5817			28.5066	28.6761
			0-300 bp				GAPDH				SYNAPSIN
		mda d0 rest	21.5184				29.3664				27.8542
			21.3753				28.6847				27.9885
			21.5222	21.4719	-2.05219		28.4266	28.8259	1.50485		28.4534	28.0987	-0.76965
		mda d0 igg	23.6576		4.14736		27.3654		0.352367		28.946		1.70486
			23.8082				27.4324				28.9485
			23.1066	23.5241			27.1654	27.3211			28.7106	28.8683
			0-300 bp				GAPDH				SYNAPSIN
		mda d0 rest 1	21.9913				28.1835				28.6995
			21.9567				28.4443				28.5703
			21.5907	21.8463	-1.6258		28.7484	28.4587	-0.364142		28.3946	28.5548	-0.35062
		mda d0 igg	23.5477		3.08614		28.6328		1.28712		28.9376		1.27511
			23.4353				29.0956				28.7752
			23.4332	23.4721			28.7402	28.8229			29.0034	28.9054
	Day 10
			0-300 bp				GAPDH				SYNAPSIN
		REST 1	21.4903				27.2904				28.5186
			21.2955				27.2907				28.4171
			21.416	21.4006	-0.0747013		27.4377	27.3396	-0.229321		28.456	28.4639	-2.12827
		IGG 1	21.9708		1.05314		27.6346		1.17228				4.37192
			21.3892				27.6257				30.7253
			21.0659	21.4753			27.4465	27.5689			30.4591	30.5922
		REST 2	21.0975				26.7266				23.4875
			21.2206				26.8477				22.4366
			21.3299	21.216	0.109498		26.7214	26.7652	0.541323		22.3714	22.7652	-5.19351
		IGG 2	21.0983		0.92691		26.2413		0.68714		28.4065		36.5933
			21.2033				26.2412				27.3729
			21.0181	21.1065			26.1892	26.2239			28.0966	27.9587
		rest 3	21.7651
			21.0476				28.0723				22.7278
			21.5893	21.4674	-0.183535		27.6847		1.69155		22.5246
		igg 3	21.7239		1.13566		27.8498	27.8689	0.309594		22.4221	22.5582	-6.13039
			21.5631				26.2482				28.816		70.0536
			21.6656	21.6509			26.237				28.7916
							26.047	26.1774			28.4581	28.6886
	Day 14		0-300 bp				GAPDH				SYNAPSIN
		d14 rest 1	15.6759				23.3055				28.5748
			15.5365				23.2307				28.633
			15.5641	15.5921	-1.16838		20.9098	22.482	1.41718		28.0994	28.4357	-0.549082
		d14 igg 1	16.8055		2.24759		21.4988		0.374443		29.2574		1.46315
			16.9452				21.2347				28.6676
			16.5309	16.7605			20.4609	21.0648			29.0293	28.9848
			0-300 bp				GAPDH				SYNAPSIN
		d14 rest 2	16.253				21.0914				23.7781
			15.5751				21.0295				23.5934
			15.236	15.688	-1.25119		21.0892	21.0701	0.476729		23.5976	23.6564	-3.60451
		d14 igg 2	16.8034		2.38038		20.9832		0.718605		27.41		12.1637
			16.8446				20.3587				27.1977
			17.1697	16.9392			20.4381	20.5933			27.1749	27.2609
			0-300 bp				GAPDH				SYNAPSIN
		d14 rest 3	16.7699				22.1623				23.2884
			16.4377				22.2901				23.3466
			16.4367	16.5481	-0.303837		22.0505	22.1676	0.0874189		23.2009	23.2786	-0.259951
		d14 igg 3	16.8848		1.23442		21.9777		0.941205		23.8304		1.19744
			17.014				22.2997				23.3742
			16.657	16.852			21.9632	22.0802			23.4111	23.5386

## Sheet: ezh2  6E
	Day 0
		0-300			gapdh			ccnd2
	d0 ezh2 1	15.4587			21.9333			29.2578
		14.9548			21.5481			29.8342
		14.9745	15.1293	-2.33477	21.5723	21.6846	0.510505	29.2457	29.4459	-0.652015
	d0 igg 1	17.6441		5.0447	21.4321		0.701977	30.1014		1.57136
		17.4886			21.7518			30.1372
		17.2597	17.4641		20.3383	21.1741		30.0552	30.0979
		0-300			gapdh			ccnd2
	mda d0 ezh2 1	21.9055			27.654			28.3485
		22.3673			27.5676			28.0629
		21.4578	21.9102	-1.61393	27.525	27.5822	0.261149	27.7884	28.0666	-0.743604
	mda d0 igg	23.6576		3.06084	27.3654		0.834423	28.0729		1.67435
		23.8082			27.4324			28.6297
		23.1066	23.5241		27.1654	27.3211		29.7279	28.8102
		0-300			gapdh			ccnd2
	mda d0 ezh2 1	21.694			28.8253			27.1892
		21.314			29.1076			27.1508
		21.1685	21.3922	-2.07988	28.4579	28.7969	-0.0259344	26.782	27.0406	-0.392707
	mda d0 igg	23.5477		4.22772	28.6328		1.01814	27.4239		1.31285
		23.4353			29.0956			27.4501
		23.4332	23.4721		28.7402	28.8229		27.426	27.4333
Day 10
	0-300 bp				gapdh				ccnd2
mda d10 ezh2	21.4389				28.4231				16.6332
	21.9219				28.5413				16.6232
	21.6284	21.663	-0.228578		28.3575	28.4406	0.846082		16.5662	16.6076	-2.2494
mda d10 igg	22.2892		1.17168		27.4881		0.556294		19.027		4.75486
	21.9107				27.6028				18.8121
	21.475	21.8916			27.6928	27.5946			18.7318	18.857
	0-300 bp				gapdh				ccnd2
mda d10 ezh2	21.3653				27.9316				16.186
	21.4052				28.0247				16.1755
	21.9283	21.5662	0.279295		27.9451	27.9672	-0.439068		15.8828	16.0814	-4.05669
mda d10 igg	20.739		0.823994		28.4826		1.35573		20.5021		16.6413
	21.6922				28.6609				19.6502
	21.4296	21.287			28.0751	28.4062			20.2621	20.1381
	0-300 bp				gapdh				ccnd2
d10 ezh2 3	19.7864				22.7079				16.9903
	16.6685				23.0492				16.9475
	16.1374	16.4029	0.377853		22.5279	22.7886	0.528694		17.0162	16.9847	-3.32578
d10 igg 3	16.1136		0.769582		22.0964		0.693182		20.4166		10.0267
	15.8133				22.5364				20.2973
	16.1483	16.0251			22.1468	22.2599			20.2174	20.3104
	0-300 bp				gapdh				ccnd2
d14 ezh2 1	16.6408				22.2719				23.4968
	16.3724				22.0846				23.6176
	16.6363	16.5498	-0.389394		22.0684	22.1416	1.07682		23.3951	23.5032	-1.91166
d14 igg 1	16.8034		1.30984		21.4988		0.474073		25.5448		3.76242
	16.8446				21.2347				25.3849
	17.1697	16.9392			20.4609	21.0648			25.3148	25.4148
	0-300 bp				gapdh				ccnd2
d14 ezh2 2	17.6102				21.4548				29.9199
	16.1075				21.2667				27.3308
	15.3865	16.3681	-0.483851		21.0876	21.2697	0.676388		29.5256	28.9254	-0.469671
d14 igg 2	16.8848		1.39847		20.9832		0.62573		29.3372		1.38479
	17.014				20.3587				29.4657
	16.657	16.852			20.4381	20.5933			29.3825	29.3951
	0-300 bp				gapdh				ccnd2
d14 ezh2 3	22.0279				28.5426				17.4793
	21.4683				28.1193				17.5334
	21.5915	21.6959	-0.115491		28.1026	28.2548	0.108404		17.2924	17.435	-0.69082
d14 igg 3	22.003		1.08334		28.0731		0.927614		18.1553		1.6142
	21.8258				28.162				18.0602
	21.6053	21.8114			28.2041	28.1464			18.162	18.1258

## Sheet: H3K27me3 6F
	Day 0
			0-300				gapdh
		d0 h3k27me3	17.0342				22.5759
			16.0521				22.9821
			16.5843	16.3182	-0.985559		22.6281	22.8051	0.599144
		do h3	18.7175		1.98008		22.2266		0.660146
			17.1796				22.4422
			16.0142	17.3038			21.949	22.2059
			0-300				gapdh
		H3K27ME3 2	20.4796				24.6467
							24.6939
			20.4897	20.4847	-2.02356		25.1159	24.8188	1.39511
		H3 2	22.6316		4.06587		23.4879		0.380216
			22.391				23.3931
			22.5022	22.5082			23.3901	23.4237
			0-300				gapdh
		H3K27ME3	21.4398				26.1907
			21.5469				26.2856
			21.4126	21.4664	-1.04448		26.1505	26.2089	0.30625
		H3	22.2136		2.06262		26.0105		0.808741
			22.4331				25.8931
			22.8861	22.5109			25.8044	25.9027
	Day 10														Day 12
			0-300				gapdh
		d10 h3k27me3	27.4374				34.3398
			27.2639				34.853
			27.1679	27.2897	0.249076		34.1722	34.455	3.78878
		d10 h3	27.1892		0.841435		30.8197		0.0723541
			27.1508				30.5602
			26.782	27.0406			30.6187	30.6662
		d10 input	27.4239
			27.4501				36.6623
			27.426	27.4333				36.6623
			0-300bp				GAPDH
		d10 h3k27me3	28.0751				36.224
			28.046	28.0586			36.4865	36.4322
			28.0549				36.5861
		d10 h3	27.3481		0.744957		36.1775		-0.180142
			27.1793	27.3137	0.596686		36.5903	36.6123	1.133
			27.4137				37.0692
		d10 input	29.4695				32.3288
			29.5446	29.3231			31.9378	32.153
			28.9553				32.1923
			0-300bp				GAPDH
		d10 h3k27me3	26.1316				37.0627
			26.2426				36.7321
			26.3159	26.23	-0.231027		36.9406	36.9118	0.556668
		d10 h3	26.7123		1.17367		36.1125		0.67987
			26.4982				35.8099
			26.1727	26.4611			37.143	36.3551
day 14
			0-300				gapdh
		d14 27me3	25.3615				38.3901
			24.7304				35.2565
			24.7242	24.9387	-1.97818		35.5027	36.3831	7.54731
		d14 h3	27.0709		3.93995		28.9451		0.00534606
			33.5202				28.6418
			26.7629	26.9169			28.9205	28.8358
		d14 input	28.155				38.0358
			29.14				38.6628
			27.8492	28.3814			36.7875	37.8287
			0-300bp				GAPDH
		d14 27me3	23.7103
			27.2872	27.2979	-2.24732		37.8697	38.742	5.04426
			27.3085		4.74799		39.6142		0.0303058
		d14 h3	29.5304				33.8557
			29.4408	29.5452			33.5247	33.6977
			29.6644				33.7128
		d14 input	28.7206				30.7332
			28.7234	28.7096			31.0052	30.9424
			28.6848				31.0888
			0-300bp				GAPDH
		d14 27me3	21.2103				27.0766
			21.0755				27.1582
			21.0108	21.0989	-0.999233		27.3528	27.1959	0.0475601
		d14 h3	22.2032		1.99894		27.2976		0.967571
			22.0046				26.9597
			22.0865	22.0981			27.1876	27.1483

## Sheet: mrna  6G
				GAPDH			TERT ENDO
			Day 0 1	16.1273			22.4715
				16.2442	16.1857		22.5856	22.4742	6.28849
				20.1469			22.3655
			Day0 2	17.2029			23.3006
				17.6305	17.3132		23.3726	23.3366	6.02338
				17.1063			24.1821
			D10 1	18.9631			23.3465
				18.3822	18.6268		23.1827	23.2056	4.57877	-1.70971
				18.5351			23.0875			3.27096
			D10 2	17.1668			22.043
				17.357	17.3194		21.8233	21.8759	4.55656	-1.46683
				17.4343			21.7615			2.76413
			Day14 1	18.2535			24.867
				18.9032	18.5588		24.5278	24.6708	6.112	-0.176485
				18.5195			24.6174			1.13013
			Day14 2	16.0033			22.7009
				15.8667	15.9285		22.5748	22.6791	6.75056	0.727176
				15.9155			22.7616			0.604085
				GAPDH			TERT ENDO
			MDA D0	28.2004			28.5578
				27.8561			29.4007
				28.1319	28.0628		28.897	28.9518	0.889052
			D10	29.5547			27.9217
				29.2774			28.432
				29.6148	29.4823		28.4775	28.2771	-1.20524	-2.09429
			D14	27.0378			28.0293			4.27016
				26.8397			28.4566
				26.762	26.8798		29.054	28.5133	1.63345	0.744403
										0.596915
