# Supplementary material for: Telomeres control human telomerase (TERT) expression through non-telomeric TRF2
Source: eLife. 2025 Sep 30;14:RP104045. doi: 10.7554/eLife.104045 (PMC12483519; doi:10.7554/eLife.104045)
Supplement: Figure 7—figure supplement 1—source data 1. [file elife-104045-fig7-figsupp1-data1.xlsx]

## Sheet: TRAP A
Application: Tecan i-control				Tecan i-control , 2.0.10.0
Device: infinite 200				Serial number: 1001007569				Serial number of connected stacker:
Firmware: V_2.11_04/08_InfiniTe (Apr 4 2008/14.37.11)				MAI, V_2.11_04/08_InfiniTe (Apr 4 2008/14.37.11)
Date:	2021-07-23
Time:	6:31:54 AM
System				DESKTOP-KJ6EP9L
User				DESKTOP-KJ6EP9L\shantnu
Plate				Greiner 96 Flat Bottom Transparent Polystyrene Cat. No.: 655101/655161/655192 [GRE96ft.pdfx]
Plate-ID (Stacker)
Shaking (Linear) Duration:				10	s
Shaking (Linear) Amplitude:				1	mm
3 Labels															0.5222
Mode				Absorbance										ht	0.5587	0.54045	0.4874	0.01825
Wavelength				450	nm										0.0522
Bandwidth				9	nm									neg	0.0539	0.05305
Reference Wavelength				690	nm										0.2044
Bandwidth				9	nm									ht1	0.2056	0.205	0.15195	0.000599995
Number of Flashes				25											0.2417
Settle Time				0	ms									ht2	0.2576	0.24965	0.1966	0.00795001
Part of Plate				C2-D12; E2-E5											0.0548
Start Time:	7/23/2021 6:32:04 AM													ht3	0.0616	0.0582	0.00515	0.0034
															0.0587
	Temperature: 32.6 °C													ht4	0.062	0.06035	0.0073	0.00165
Dual wavelength measurement with measurement wavelength															0.066
<>	2	3	4	5	6	7	8	9	10	11	12			ht5	0.0717	0.06885	0.0158	0.00285
C	0.563	0.603	0.0932	0.0967	0.245	0.2471	0.2822	0.2976	0.0965	0.1035	0.0564				0.4089
D	0.1005	0.1061	0.1081	0.1117	0.4487	0.4697	0.1987	0.204	0.7917	0.8043	0.0541			lt1	0.4297	0.4193	0.36625	0.0104
E	0.5757	0.5917	0.1935	0.2014											0.1573
														lt2	0.1626	0.15995	0.1069	0.00265
Dual wavelength measurement with reference wavelength															0.7477
<>	2	3	4	5	6	7	8	9	10	11	12			lt3	0.7621	0.7549	0.70185	0.0072
C	0.0407	0.0443	0.0409	0.0427	0.0407	0.0415	0.0405	0.04	0.0417	0.0419	0.0489				0.5358
D	0.0418	0.0441	0.0421	0.04	0.0399	0.04	0.0414	0.0415	0.0439	0.0422	0.0489			lt4	0.5516	0.5437	0.49065	0.0079
E	0.0399	0.0401	0.04	0.0411											0.1536
														lt5	0.1603	0.15695	0.1039	0.00335
Calculated difference between measurement and reference measurement
<>	2	3	4	5	6	7	8	9	10	11	12
C	0.5222	0.5587	0.0522	0.0539	0.2044	0.2056	0.2417	0.2576	0.0548	0.0616	0.0075			HT1080	0.4874		0.01825
D	0.0587	0.062	0.066	0.0717	0.4089	0.4297	0.1573	0.1626	0.7477	0.7621	0.0051			xHT 1	0.15195	0.311756	0.000599995
E	0.5358	0.5516	0.1536	0.1603										xHT 2	0.1966	1.29385	0.00795001
														xHT 3	0.00515	0.0261953	0.0034
														xHT 4	0.0073	1.41748	0.00165
														xHT 5	0.0158	2.16438	0.00285
End Time:	7/23/2021 6:32:55 AM													xLT 1	0.36625	23.1804	0.0104
														xLT 2	0.1069	0.291877	0.00265
														xLT 3	0.70185	6.56548	0.0072
														xLT 4	0.49065	0.699081	0.0079
														xLT 5	0.1039	0.21176	0.00335
