# Supplementary material for: Telomeres control human telomerase (TERT) expression through non-telomeric TRF2
Source: eLife. 2025 Sep 30;14:RP104045. doi: 10.7554/eLife.104045 (PMC12483519; doi:10.7554/eLife.104045)
Supplement: Figure 7—source data 1. [file elife-104045-fig7-data1.xlsx]

## Sheet: Telomere length 7B
		HT 10ng	21.09		12.7								HT1080 LT	LT 10ng	21.34		10.72
			21.07		12.55										21.24		10.79
			21.63	21.2633	14.01	12.625		-8.63833	398.472	-8.16583					21.77	21.45	11.23	10.9133		-10.5367	1485.43	4.90687
		HT 5ng	22.02		14.45					302.725				LT 5ng	22.31		12.02							5.48796	0.581088
			21.98		14.37										22.33		11.78
			22.31	22.1033	15.03	14.41		-7.69333	206.978						23.59	22.7433	13.18	11.9		-10.8433	1837.25	6.06905
					fold change over HT1080 cc
		tel				36b4							tel				36b4
	xht1 20	10.1125				21.0481						xht1 10	10.888				21.5882
		10.1347				20.9024							11.0108				21.4184
		9.7996	10.0156	-10.8879		20.7601	20.9036						10.8027	10.9005	-10.5972		21.4863	21.4976
	xht2 20	10.5647		1894.95	6.25964	20.793			5.68835	0.571289		xht2 10	10.962		1549.06	5.11706	21.396
		10.3231				20.8081							10.8445				21.5461
		10.2037	10.3638	-10.4016		20.6954	20.7655						10.8394	10.882	-10.5711		21.4171	21.4531
	xht3 20	10.6318		1352.72	4.46848	21.0932			4.74689	0.278404		xht3 10	11.5635		1521.28	5.02529	21.5887
		10.6481				20.8704							11.5263				21.6675
		10.5598	10.6133	-10.382		21.022	20.9952						11.2019	11.4306	-10.1426		21.4634	21.5732
	xht4 20	9.45607		1334.4	4.40796	21.236			4.07102	0.33694		xht4 10	10.1328		1130.4	3.73408	22.1315
		9.53732				21.3556							10.214				22.0291
		9.38641	9.45993	-11.825		21.2634	21.285						10.0999	10.1489	-11.925		22.0613	22.0739
	xht5 20	10.1129		3628.2	11.9851	22.0452			12.4152	0.430089		xht5 10	10.9721		3888.6	12.8453	22.3457
		10.2799				21.7817							10.8925				22.4873
		9.8204	10.0711	-11.7491		21.6334	21.8201						10.7187	10.8611	-11.5336		22.3511	22.3947
	xlt1 20	8.37153		3442.05	11.3702	21.0019			10.5817	0.788561		xlt1 10	10.4361		2964.62	9.79312	21.7794
		8.53172				20.7998							10.2509				21.7047
		8.30886	8.40404	-12.4425		20.7379	20.8465						10.0081	10.2317	-11.5027		21.7192	21.7344
	xlt2 20	8.711		5566.18	18.3869	20.6714			13.9862	4.40073		xlt2 10	9.30178		2901.76	9.58548	21.4867
		8.44757				20.7615							9.23851				21.4783
		8.50445	8.55434	-12.0888		20.4966	20.6432						9.69109	9.41046	-12.0351		21.3716	21.4455
	xlt3 20	8.385		4356.18	14.3899	21.3268			14.1266	0.26328		xlt3 10	10.0692		4196.77	13.8633	22.2331
		8.66079				21.3912							10.3403				22.2204
		8.4268	8.49086	-12.8143		21.1976	21.3052						10.2324	10.214	-11.9818		22.1338	22.1958
	xlt4 20	8.70597		7202.7	23.7929	20.9124			18.5768	5.21607		xlt4 10	9.44138		4044.64	13.3608	22.0573
		9.03699				20.9268							9.55669				22.0892
		8.42742	8.72346	-12.2328		21.0294	20.9562						9.52849	9.50885	-12.4831		21.8293	21.9919
	xlt5 20	9.09245		4813.12	15.8993	21.5157			17.4057	1.50633		xlt5 10	9.82473		5725.13	18.912	22.1934
		8.87653				21.4876							9.59357				22.2916
		8.70802	8.89233	-12.5255		21.2501	21.4178						9.89168	9.76999	-12.506		22.3431	22.276
				5895.75	19.4756				19.3454	0.130178					5816.94	19.2153
							xHT 2	1.17976	0.16603
			HT1080	1
			xHT 1	5.68835	0.571289		xHT 1	1.39522	0.0248544
			xHT 2	4.74689	0.278404		xHT 2	1.17976	0.16603
			xHT 3	4.07102	0.33694		xHT 3	1	0.038359
			xHT 4	12.4152	0.430089		xHT 4	3.0795	0.360523
			xHT 5	10.5817	0.788561		xHT 5	2.60106	0.0215768
			xLT 1	13.9862	4.40073		xLT 1	3.36916	0.802138
			xLT 2	14.1266	0.26328		xLT 2	3.48858	0.224063
			xLT 3	18.5768	5.21607		xLT 3	4.48789	0.909825
			xLT 4	17.4057	1.50633		xLT 4	4.33583	0.728869
			xLT 5	19.3454	0.130178		xLT 5	4.7821	0.363816

## Sheet: mRNA 7C
		18S		TERT		TERC
										TERT		TERC				TERT	TERC
HT1080	A	14.6467	14.9118	27.5021	27.1748	22.5008	22.6437		0.000203455	1	0.00470419	1				1	1
		14.8976		27.2789		22.5509										0.890173	0.815223
		15.1911		26.7435		22.8792										0.83454	0.486412
	B	15.3018	15.009	27.9077	27.4398	23.1821	23.0355		0.00018111	0.890173	0.00383497	0.815223				0.255649	0.328665
		14.7864		27.251		23.183										1.02337	1.24481
		14.9386		27.1606		22.7415										9.55595	1.78235
	C	15.2734	14.9724	27.5687	27.4964	24.096	23.744		0.000169791	0.83454	0.00228818	0.486412				4.05406	2.27024
		15.0207		27.6897		23.8655										17.4681	1.6563
		14.6233		27.2308		23.2706										7.56794	3.36673
	D	15.1804	15.3467	29.5745	29.5775	24.9946	24.6839		5.2013e-05	0.255649	0.0015461	0.328665				3.23544	1.81403
		15.3302		29.5599		24.4466
		15.5295		29.5981		24.6104												HT1080					HT1080-LT
	E	15.133	15.0528	27.312	27.2825	22.3824	22.4687		0.000208209	1.02337	0.00585583	1.24481						A	B	C	D	E	A	B	C	D	E
		14.6649		26.6592		22.9654											TERT	1	0.890173	0.83454	0.255649	1.02337	9.55595	4.05406	17.4681	7.56794	3.23544
		15.3605		27.8763		22.0584											TERC	1	0.815223	0.486412	0.328665	1.24481	1.78235	2.27024	1.6563	3.36673	1.81403
HT1080-LT	A	16.3264	16.7005	25.783	25.7071	23.1634	23.5986		0.0019442	9.55595	0.00838454	1.78235
		16.9392		25.5333		23.5178
		16.8359		25.805		24.1145
	B	15.2213	15.2155	25.3978	25.4591	21.3398	21.7645		0.000824817	4.05406	0.0106796	2.27024
		15.5466		25.9297		22.5286
		14.8786		25.0499		21.425
	C	14.547	14.5548	22.9993	22.6911	21.5439	21.5587		0.00355397	17.4681	0.00779157	1.6563
		14.6625		22.2973		21.62
		14.4549		22.7768		21.5121
	D	15.4813	15.1077	24.3025	24.4508	21.5284	21.0882		0.00153973	7.56794	0.0158377	3.36673
		15.0388		24.5955		20.5745
		14.8031		24.4544		21.1618
	E	15.1657	15.2108	25.2738	25.7798	22.0387	22.0834		0.000658265	3.23544	0.00853355	1.81403
		15.2641		25.8901		21.7244
		15.2025		26.1755		22.4871

## Sheet:  TRF2 ChIP 7D
					0-300				gapdh				TEL								0-300				gapdh				telomere
			xht input 1		35.8745				30.7445				16.63						lt input 1		35.3191				31.1928				15.5535	15.7851
					35.6189				30.7869				16.58								33.5911				31.1673				16.0167
					35.2149	35.7467			31.1497	30.8937			16.39	16.5333							34.1191	33.8551			31.6928	31.3509			14.9541
			xht trf2 1		40.5855				29.295				16.25						lt trf2 1		35.0484				32.8374				16.0574	14.5127	-3.81136
					35.13				29.4957				16.2								34.9456				32.6451				14.1188		14.0389
					40.351	40.4683	-1.75522		29.0984	29.2964	-2.10066		16.96	16.47	-0.6						33.3903	34.997	0.304009		32.1458	32.5428	-0.287795		14.9067
			xht igg 1		43.0644		3.37577		31.4678		4.28905		17.19		1.51572				lt igg 1		35.0283		0.809999		32.222		1.22077		18.6018	18.3241
					41.3826				31.3706				17.08								34.6292				33.4392				18.0464
					33.3681	42.2235			31.3527	31.397			16.94	17.07							34.4216	34.693				32.8306			18.7826
			xht input 2		36.1264				38.8939				12.73						LT input 2		30.2459				31.6145				14.8816
					35.2976				38.7105				12.55								30.3632				32.0027				14.9892
					34.5409	35.712			40.1224	38.8022			12.28	12.52							30.0908	30.2333			32.5032	32.0402			14.695	14.8553	-2.21812
			xht trf2 2		40.8205				34.3421				16.29						LT TRF2 2		29.535				31.1304				17.158		4.65287
					40.6114				36.9588				16.22								29.2433				31.565				17.0367
					45.2483	40.716	-1.36971		35.2241	36.0915	0.989013		16.35	16.29	-0.44						28.923	29.2338	-0.993524		31.9623	31.5526	-0.743426		17.0254	17.0734
			xht igg 2		42.3893		2.58419		36.0899		0.503822		16.53		1.3566				LT IGG 2		30.1745		1.99104		32.288		1.67415		16.6905
					41.782				34.5189				16.66								30.27				32.457				16.7058
					44.089	42.0857			34.6985	35.1025			17.01	16.73							30.2375	30.2273			32.143	32.296			16.551	16.6491
			xht input 3		32.3939				32.1976				16.06						lt input 3		31.0458				32.0369				15.3353	14.5669
					33.0096				31.5742				16.93								28.9258				31.9273				14.0204
					33.3385	32.914			31.2564	31.6761			16.03	16.34	-0.79						30.7442	30.2386			32.8478	32.2706			14.345
			xht trf2 3		30.4873				35.5229				17.11		1.72907				lt trf2 3		30.8571				31.3044				15.111	15.0786	-0.83109
					30.1963				36.6623				17.25								31.6079				32.0158				15.0462		1.77903
					30.7095	30.4644	-0.0544708		36.24	36.1418	1.589		17.02	17.13							31.4653	31.3101	1.17723		31.3372	31.5525	-0.555853		16.0623
			xht igg 3		31.1995		1.03848		35.6592		0.332402		14.26						lt igg 3		30.1923		0.442199		31.938		1.47004		16.1071	15.9097
					31.1399				34.5578				14.24								30.067				33.0436				15.5591
					29.2171	30.5188			33.4412	34.5528			14.24	14.25							30.1393	30.1329			31.3435	32.1084			16.0631
			XHT4 TRF2						32.3366			HT4 TRF2	16.02						XLT 4 TRF2									LT4 TRF2	16.27
					34.2723				33.0318				15.8								36.8776				42.0187				16.19
					33.7301	34.0012	-1.18156		33.218	32.8621	1.1295		15.63	15.82	-0.569412							36.8776	2.4645		43.4684	42.7435	0.539485		16.16	16.21	-2.40885
			XHT 4 IGG		35.0033		2.26821		31.2683		0.457074	HT4 IGG	16.56		1.48392				XLT 4 IGG				0.18118				0.688017	LT4 IGG	18.67		5.31052
					36.262				32.3214				16.37								34.4131				40.7091				18.63
					35.3622	35.1827			31.6082	31.7326			16.23	16.39								34.4131			43.699	42.2041			18.54	18.62
			XHT 5 TRF2		34.1255				34.5334			HT5 TRF2	16.54						XLT 5 TRF2		35.1841				43.9913			LT5 TRF2	18.9897
					33.3184				34.1285				16.61								36.1248				45.6877				18.9308
					34.9549	33.722	-1.01387			34.331	1.72996		16.37	16.51	0.110956						34.6611	34.9226	0.334246		42.7886	44.1559	1.31008		18.6691	18.8632	-1.04395
			XHT5 IGG		34.7479		2.01932		32.8231		0.30146	HT5 IGG	16.52		0.925975				XLT 5 IGG		34.1439		0.793199				0.4033	LT5 IGG	19.9787		2.06186
					35.0087				32.6117				16.41								35.0327				43.6802				19.9145
					34.451	34.7359			32.3682	32.601			16.26	16.4								34.5883			42.0114	42.8458			19.8283	19.9072
																																		xeno HT1080-ST	xeno HT1080-LT
																							0.809999				1.22077				14.0389			1.51572	14.0389
							3.37577				4.28905				1.51572								1.99104				1.67415				4.65287			1.3566	4.65287
							2.58419				0.503822				1.3566								0.442199				1.47004				1.77903			1.72907	1.77903
							1.03848				0.332402				1.72907								0.18118				0.688017				5.31052			1.48392	5.31052
							2.26821				0.457074				1.48392								0.793199				0.4033				2.06186			0.925975	2.06186
							2.01932				0.30146				0.925975
				#DIV/0!	#DIV/0!	#DIV/0!	#DIV/0!
				#DIV/0!	#DIV/0!	#DIV/0!	#DIV/0!

## Sheet: H3K27me3 7E
					0-300bp			GAPDH							0-300bp			GAPDH
		Xht 1		h327me3	31.266								xlt 1	h327me3	32.5709			0
					31.3492			41.0726							31.8778			0
					31.0426	31.2193	-0.807446	39.5209	40.2968	0.608114					32.3783	32.2757	0.122931	39.1201	39.1201	3.96301
				h3	32.3806		1.75011	39.6887		0.656054				h3	32.2843		0.91832	34.3266		0.0641232
					31.832										31.9732			36.4422
					31.8676	32.0267			39.6887						32.2008	32.1528		34.7024	35.1571
				input	31.6291			30.4179						input	31.5178			26.099
					32.1009			30.438							31.3632			26.1264
					31.6411	31.7904		30.5433	30.4664						31.5683	31.4831		26.2863	26.1706
		Xht 2		h327me3	32.3587			0					Xlt 2	h327me3	31.6224			33.8444
					32.1218			0							31.615			36.3406
					32.4234	32.3013	-0.488381	0	0						31.6801	31.6391	-0.162429	35.2768	35.1539	1.78646
				h3	32.829		1.40287	35.5943						h3	31.9377		1.11917	33.3458		0.289883
					32.8775			36.034							31.8377			43.6494
					32.6626	32.7897		36.0384	35.8889						31.6292	31.8016		33.3892	33.3675
				input	32.4182			39.9578						input	31.5027		0.91832	28.6462
					32.0561			40.8652							31.4188		1.11917	28.301
					32.3818	32.2854		45.9201	42.2477						31.6705	31.5307		28.6142	28.5205
					0-300bp			GAPDH							0-300bp			GAPDH
		xht 3		h3	30.522			28.672					xlt 3	h3	29.4322			29.8204
					29.9017			29.6678							29.1294			29.0746
					31.3534	30.2118		29.7759	29.3719						29.3969	29.3195		29.3834	29.4261
				27me3	28.5477			37.0505						27me3	29.7717			33.3673
					29.5362			36.9366							29.8006			32.7736
					29.4591	29.181	-1.03083	34.991	36.9935	7.6216					30.0109	29.861	0.541538	33.5664	33.2358	3.80965
				input	31.0815		2.0432	28.2448		0.00507773				input	29.6367		0.687038	27.5515		0.0713153
					31.5068			28.5931							30.9602			27.54
					31.4751	31.3544		28.8513	28.5631						30.1722	30.2564		27.9709	27.6874
													xlt 4	h3	29.1076			28.7623
															29.2776			29.0479
					0-300bp			GAPDH							29.3427	29.2426		28.5576	28.7893
		xht 4		h3	29.3641			30.7208						27me3	30.0123			30.8915
					29.2858			32.3104							30.8972			31.5403
					29.3634	29.3378		32.1527	31.728						30.1395	30.3497	1.10703	32.1221	31.5179	2.72865
				27me3	28.2869			33.6729						input	31.2601		0.464248	29.1417		0.150867
					28.2948			32.6498							30.7031			30.594
					28.9074	28.4964	-0.841396	32.3251	32.8826	1.1546					33.3058	30.9816		29.6969	29.8678
				input	30.1997		1.79178	30.447		0.449189			xlt 5	h3	29.9824			29.1479
					30.457			30.8152							30.1127			28.8568
					30.0868	30.2478		30.8662	30.7095						30.0926	30.0626		29.0184	29.0077
		xht 5		h3	29.1037			29.3229						27me3	30.397			28.858
					31.5248			28.7741							30.114			28.7742
					29.8924	29.498		29.5177	29.4203						30.0851	30.1987	0.136151	28.3748	28.669	-0.33871
				27me3	28.2262			28.9881						input	30.6309		0.909943	25.2046		1.26463
					28.8808			31.941							30.4813			25.1428
					28.4712	28.5261	-0.971951	32.8761	31.2684	1.84808					30.6031	30.5718		25.2306	25.1927
				input	31.6938		1.96149	31.41		0.277761
					30.9261			29.5741
					32.2947	31.6382		32.6113	31.1985
