# Supplementary material for: Telomeres control human telomerase (TERT) expression through non-telomeric TRF2
Source: eLife. 2025 Sep 30;14:RP104045. doi: 10.7554/eLife.104045 (PMC12483519; doi:10.7554/eLife.104045)
Supplement: Figure 8—source data 1. [file elife-104045-fig8-data1.xlsx]

## Sheet: ccr5 -124 g>a mut tel facs B
124a8 is the clone number used internally in lab
	unstained	stained (FITC)
124a8	11061	117367		106306	1.50911
124a8 short	8567	79010		70443			Short telomere	1
							Long telomere	1.50911

## Sheet: ccr5 -146 g>a mut tel facs   B
146homo is the clone number used internally in lab
	unstained	stained (FITC)					Short telomere	1
146 homo short	9009	30030		21021			Long telomere	1.31744
146homo	8337	36031		27694	1.31744

## Sheet: TRF2 ChIP   C
		WT promoter Insert scrambled control
				hTERT Gaussia Insert promoter				gapdh			TELOMERE
		WT prom TRF2		34.1				45.3			20.04
				33.39							19.41
				33.56	33.6833	-0.671667		45.35	45.32	0.201343	19.48	19.64	-2.08118
		wt prom igg		34.96		1.59291		45.32		0.869741	21.56		4.23152															t2g5 scr trf2	19	35.8232
											21.18
				33.75	34.355			44.92	45.12		22.44	21.72																		34.5054	35.1643	-0.866456
		wt prom input		31.38				34.66			21.2																	scr igg	20	35.2328		1.82318
				31.64							21.01																			36.7024
				31.45	31.49			34.88	34.77		20.65	20.95																		36.157	36.0307
																												scr input	21	35.1708
																														34.8751
																														35.7929	35.2796
																												t2g5 htr trf2	22	35.2866
				hTERT Gaussia Insert promoter				GAPDH			TELOMERE																			35.8503
		WT promTRF2		31.6418				34.01			15.38																				35.5685	-0.746508
				31.4482				34.49			15.11																	htr igg	23	36.4187		1.67773
				31.4816	31.5239	-0.619033		34.07	34.19	0.955	15.08	15.19	-3.35853																	36.017
		wt prom igg		32.4431		1.53585				0.515842	18.62		10.257																	36.5092	36.315
				31.7533				32.16			18.52																	htr input	24	34.7427
				32.2324	32.1429			34.31	33.235		18.51	18.55																		35.1043
																														35.4489	35.0987
				hTERT Gaussia Insert promoter							TELOMERE
		WT prom TRF2		35.1476				GAPDH			22.3385
				35.2461				32.29			22.7191
					35.1968	0.22678		32.46			22.8984	22.652	-0.753466
		wt prom igg		34.9947		0.85454		32.28	32.35	0.172685	23.4926		1.68584
				34.9454				32.08		0.88719	23.2752
					34.9701			32.46			23.4486	23.4055
		WT PROM INPUT		33.34				31.98	32.17		15.6444
				32.5				31.69			15.7512
					32.92			32.11			15.8765	15.7573
								32.04	31.95
					1.59291
					1.53585
					0.85454
		WT promoter Insert TEL SGRNA
				hTERT Gaussia				Telomere			GAPDH
		WT prom TEL SGRNA TRF2		34.25				16.33			34.87
								16.46			35.01
				34.16	34.1594	-1.34258		16.33	16.37	-1.98451	34.47	34.78	0.654284
		wt prom TEL SGRNA Igg		35.76		2.53604		18.35		3.95728	34.05		0.635391
								18.39			34.21
				35.5	35.502			18.34	18.36		34.12	34.13
				hTERT Gaussia				Telomere			GAPDH
		WT prom TEL SGRNA TRF2						15.95			38.35
				34.17				16.01			39.26
				34.22	34.1947	-1.10095		15.93	15.96	-2.42702	38.26	38.62	1.46359
		wt prom TEL SGRNA Igg				2.14496		18.35		5.37781	36.53		0.362591
				35.06				18.47			37.26
				35.53	35.2956			18.35	18.39		37.7	37.16
				hTERT Gaussia				Telomere			GAPDH
		WT prom TEL SGRNA TRF2						19.39			32.75
				32.37				19.3			30.46
				32.61	32.49			19.4	19.36	-1.32446	31.25	30.86	-0.652656
		wt prom TEL SGRNA Igg		32.57				20.62		2.50439	31.45		1.57206
				34.74				20.91			31.39
					33.655	-1.165		20.54	20.69		31.68	31.51
		wt prom TEL SGRNA Input				2.24233		20.68
								20.59			30.51
								20.43	20.57		29.8	30.15
					2.53604	2.30778
					2.14496	0.166229
					2.24233
	-124 G>A UT
				hTERT Gaussia				GAPDH			TELOMERE
		-124 G>A UT TRF2		34.9							17.74
				34.14				38.12			17.57
				34.38	34.2558	-0.3443		42.01	40.07	-0.713081	17.55	17.62	-1.85064
		-124 G>A UT IgG		35.01		1.26954		41.43		1.6393	18.88		3.60659
				34.6				40.13			19.04
					34.6001				40.78		20.49	19.47
				hTERT Gaussia				GAPDH			TELOMERE
		-124 G>A UT TRF2		32.54				37.46			19.65
				32.95	32.74	-0.452264		36.22			19.62
						1.36819			36.84	0.623749	19.4	19.56	-1.03052
		-124 G>A UT IgG		34.04				36.52		0.648982	20.68		2.04275
				32.35	33.19			36.2			20.67
								35.93	36.21		20.42	20.59
								36.24			21
								35.24
								36.86	36.11
		-124 G>A UT TRF2		33.4343
				32.5554
				32.4119	32.8005	-0.722635
		-124 G>A UT IgG		33.5833		1.65019
				33.3235
				33.6628	33.5232
		-124 G>A UT Input		33.8139
				33.1574
				30.0626	33.4857
						1.26954
						1.36819
						1.65019
	-124 G>A promoter insert TEL SGRNA
				hTERT Gaussia				GAPDH			TELOMERE
		-124 G>A tel sgrna TRF2		32.48				36.73			20.01
				33.16	32.82	-0.464958		36.72			19.69
LT						1.38028			36.73	0.0300513	19.8	19.84	-0.871625
1.26954	0.919768	-124 G>A tel sgrna IgG		34.08						0.979385	20.75		1.82972
1.36819	1.00087			32.49	33.28			36.69			20.78
1.65019	1.83367							36.7	36.7		20.59	20.71
		-124 G>A tel sgrna INPUT						33.72			21.03
								33.55			20.84
ST								34.58	33.95
1.38028
1.36699											20.54	20.81
0.899941
				hTERT Gaussia				GAPDH			TELOMERE
		-124 G>A tel sgrna TRF2		35.82				36.51			17.59
				35.71				36.27			17.51
					35.7057	-0.451006		35.98	36.25	0.532413	17.45	17.52	-1.2651
		-124 G>A tel sgrna IgG		35.84		1.36699		35.93		0.691397	18.87		2.40344
								35.51			18.54
				36.16	36.1567				35.72		18.94	18.78
				hTERT Gaussia																								32.01
		-124 G>A tel sgrna TRF2		34.1076																								30.38
				33.9574																								31.1	31.17	-1.79533
				33.1903	33.7518	0.152098																						33.01		3.47094
		-124 G>A tel sgrna IgG		33.5278		0.899941
				33.2504																								32.91	32.96
				34.0208	33.5997																							29.49
		'-124 G>A tel sgrna INPUT		34.185																								29.94
				33.258																								30.07	29.83
				34.1493	34.1671
					1.38028
					1.36699
					0.899941
				gaussia				gapdh					telomere
8 8 22																			telomere
		146 trf2 1		32.5303				36.4747				146 trf2 1	14.3					146 input 1	13.9676
				32.8752				36.5762					14.26						13.9578
				32.7716	32.8234	-0.173666		35.096	36.5255	2.12123			14.16	14.24	-0.988222	1.98374			14.0843	14.0032
		146 trf2 2		32.6079		1.12792	1.12792	34.6385		0.229851		146 trf2 2	14.1					146 input 2	14.3469
				33.0921			0.891135	34.2897					14.69						14.1708
				35.5697	32.85	0.166283	0.985378	30.7992	34.4641	0.921297			14.75	14.85	-0.127742	1.09258			14.3506	14.2894
		146 trf2 3		34.0593		0.891135		34.0771		0.528034		146 trf2 3	14.57					146 input 3	14.533
				33.2158				33.929					14.45						14.0113
				32.9868	33.1013	0.0212509		31.8077	34.0031	-1.57099			14.2	14.41	-1.00822	2.01142			14.23	14.2581
		146 igg 1		33.4806		0.985378		34.8735		2.97108		146 igg 1	15.36
				32.5136				33.9349					15.3
				29.6539	32.9971			30.4696	34.4042				15.03	15.23
		146 igg 2		32.7627				34.7716				146 igg 2	15.06
				32.6048				32.314					15.07
				30.7103	32.6837			28.9118	33.5428				14.8	14.98
		146 igg 3		33.1281				35.5145				146 igg 3	15.57
				33.032				35.6336					15.33
				32.1689	33.08			31.095	35.574				15.35	15.42
	-146 G>A promtoer insert tel short
		146 tel trf2 1		33.5136				39.0171				146 tel trf2 1	13.8268
				33.0695				35.8328					13.884						telomere
				31.7645	33.2916	-0.160658		29.4287	34.7595	0.632442			13.9116	13.8741	-2.25827	4.78418		146 tel input 1	14.49
		146 tel trf2 2		34.207		1.1178	1.1178	33.8868		0.645084		146 tel trf2 2	14.3676						14.39
				34.1			0.531618	35.8278					14.4741						14.52	14.47
				33.5892	33.9654	0.911538	1.356	30.3655	33.36	-0.925701			14.6038	14.4818	-1.42058	2.67693		146 tel input 2	16.66
		146 tel trf2 3		32.0871		0.531618		36.3301		1.89961		146 tel trf2 3	15.129						14.1
				33.9251				34.0877					15.0604						14.07	14.08
				33.9188	33.9219	-0.439361		32.8118	33.4497	-1.19217			14.807	14.9988	-0.567263	1.48171		146 tel input 3	14.15
		146 tel igg 1		33.4437		1.356		34.0609		2.28496		146 tel igg 1	16.1517						14.08
				33.6802				34.1932					16.1495						14.3	14.18
				33.2329	33.4522			30.914	34.1271				16.096	16.1324
		146 tel igg 2		33.0395				36.1307				146 tel igg 2	15.8709
				33.6716				34.9441					15.9334
				32.4505	33.0539			33.6274	34.2857				15.903	15.9024
		146 tel igg 3		34.489				34.9723				146 tel igg 3	15.7423
				34.2608				34.3114					15.6171
				34.3341	34.3613			30.286	34.6419				15.3387	15.5661
8 8 22

## Sheet: H3K27ME3 ChIP  D
		WT promoter Insert ut
				hTERT Gaussia Insert promoter						GAPDH
		WT prom ut H3		31.61						43.86
				33.14						43.23
				31.39	31.5					42.7	42.96
		wt prom ut H3K27me3		31.43						0
				32.26						43.94
				30.34	31.34	-0.154661				44.5	44.22	1.26
		wt prom ut input		31.84		1.11316				42.31		0.417544
				31.19						42.98
				30.88	31.3					41.64	42.31
				hTERT Gaussia Insert promoter						GAPDH
		wt prom ut H3K27me3		34.14						37.56
				33.78						35.11
					33.96	-0.57				34.89	35	2.67667
		WT prom ut H3		34.55		1.48452				32.51		0.156402
				34.51						32.44
					34.53					32.02	32.3233
				hTERT Gaussia Insert promoter						GAPDH
		WT prom ut H3		28.53						29.15
				28.33						29.19
				28.45	28.44					29.01	29.12
		wt prom ut H3K27me3		28.13						28.33
				28.13						28.32
				28.06	28.11	-0.33				28.12	28.26	-0.86
						1.25701						1.81504
		WT prom tel sgrna
				hTERT Gaussia						GAPDH
		WT prom tel sgrna H3k27me3		34.73						34.97
				34.04	34.39	-0.841262				33.31
				35.35	-0.841262	1.79162				33.76	34.01	1.63
		wt prom tel sgrna H3		35.13	1.79162					32.02		0.323088
				35.19	35.23					32.58
										32.55	32.38
				hTERT Gaussia						GAPDH
		WT prom hTR sil H3		32.45						31.32
				30.88						30.61
				30.39	30.64					31.1	31.01
		wt prom hTR sil. H3K27ME3		29.94						31.55
				29.97						31.21
				29.27	29.7267	-0.913333				31.54	31.43	0.42
		wt prom hTR sil. Input		31.66		1.88339				31.71		0.747425
				32.09						31.36
				30.07	31.87					31.51	31.53
				hTERT Gaussia						GAPDH
		WT prom tel sgrna H3k27me3		28.3						26.8704
				28.46						27.0962
				28.51	28.42	-1.11				27.0323	26.9996	0.770438
		wt prom tel sgrna H3		29.63		2.15846				26.1371		0.586239
				29.56						26.4773
				29.4	29.53					26.0731	26.2292
	-124 G>A ut
				hTERT Gaussia						GAPDH
		-124 G>A ut H3K27ME3		35.19						34.09
				35.29						34.02
					35.24	-0.79				34.05	34.05	1.26404
		-124 G>A ut H3		36.84		1.72907				33.02		0.416377
				35.23						32.74
				32.66	36.03					32.61	32.79
				hTERT Gaussia						GAPDH
		-124 G>A ut H3K27ME3		29.9411						27.05
				28.8659						27.2
				28.7912	29.1994	0.208763				27.11	27.12	0.166104
		-124 G>A ut H3		28.701		0.865279				27.09		0.891246
				29.2937						27.05
				28.9772	28.9906					26.73	26.96
										GAPDH
		-124 G>A ut H3K27ME3		32.9868						26.8493
				33.4408						26.6352
				30.7845	33.2138	0.345468				26.8282	26.7709	0.45689
		-124 G>A ut H3		33.0043		0.787052				26.3608		0.728555
				32.7324						26.3458
				29.9539	32.8683					26.2354	26.314
	-124 G>A promoter insert hTR silenced
				hTERT Gaussia						GAPDH
		-124 G>A Htr silenced H3K27ME3		35.13						36.45
				34.06						34.77
				34.7	34.91	-0.477552				34.86	35.36	0.691027
		-124 G>A Htr silenced H3		35.58		1.39238				34.37		0.619413
				34.63						35.52
				35.2	35.39					34.12	34.67
				hTERT Gaussia						GAPDH
		-124 G>A Htr silenced H3K27ME3		29.0839						27.05
				29.4087						27.2
				29.2004	29.231	-0.17229				27.11	27.12	0.166104
		-124 G>A Htr silenced H3		29.2512		1.12685				27.09		0.891246
				29.4611						27.05
				29.4975	29.4033					26.73	26.96
				hTERT Gaussia						GAPDH
		-124 G>A Htr silenced H3K27ME3		33.1766						33.59
				33.3923						33.53
				31.0464	33.2845	-0.277974				33.34	33.49	0.394959
		-124 G>A Htr silenced H3		33.313		1.21249				32.98		0.760511
				33.8119						33.03
				30.4341	33.5624					33.27	33.09
		-146G>A prom insert UT
				hTERT Gaussia						GAPDH
		146 h3k27me3 1		28.5377						30.4511
				29.1081						30.2921
				28.6475	28.7644	-0.367778				30.7707	30.5046	-0.455805
		146 h3k27me3 2		29.8581		1.29036				32.2251		1.37155
				29.9474						31.822
				29.7207	29.842	1.06986				31.0621	31.703	0.984129
		146 hek27me3 3		29.8718		0.476365				29.6937		0.505531
				29.5426						29.582
				29.684	29.6995	-0.564815				29.6969	29.6575	-1.19695
		146 h3 1		28.7483		1.4792				31.0397		2.29254
				29.2547						30.8218
				29.3936	29.1322					31.0198	30.9604
		146 h3 2		29.0166						30.7259
				28.8118						30.8128
				28.4882	28.7722					30.618	30.7189
		146 h3 3		30.2425						31.2869
				30.5171						30.8952
				30.0334	30.2643					30.3813	30.8545
		146 input 1		32.3164						27.4164
				32.1251						27.2103
				31.4724	32.2207					27.5723	27.3997
		146 input 2		32.4841						27.9619
				32.571						27.6747
				32.1857	32.4136					28.367	28.0012
		146 input 3		34.2267						28.3683
				33.4898						27.9879
				28.1325	33.8583					27.7112	28.0225
		-146G>A prom insert tel short
				hTERT Gaussia				GAPDH
		146 tel h3k27me3 1		30.2337				31.5501
				29.9328				31.3257
				30.1377	30.1014	-1.19363		31.0068
		146 tel h3k27me3 2		32.4251		2.28728	2.28728	29.7345
				31.3072			1.0771	29.9518
				31.6598	31.7974	-0.107156	0.209225	29.7977
		146 tel h3k27me3 3		32.2952		1.0771		30.444
				34.28				30.8472
				31.5779	31.9365	2.25687		30.608
		146 tel h3 1		31.0214		0.209225		29.3591
				31.77				29.3097
				31.0937	31.2951			29.7017
		146 tel h3 2		32.0391				29.1011
				32.2614				29.1569
				31.4132	31.9045			29.0829
		146 tel h3 3		29.2957				29.4797
				29.5318				29.7222
				30.2115	29.6797			29.6134
		146 tel input 1		34.523				27.2639
				34.0891				27.2024
				33.402	34.0047			27.4481
		146 tel input 2		35.2745				27.0665
								27.0508
				34.8847	35.0796			26.9821
		146 tel input 3		33.2162				27.7267
				33.2808				27.4038
				29.2102	33.2485			27.3659

## Sheet: Luciferase activity E
			Luminescence (a.u.)					Protein conc. (total)		normalised value		Fold change wrt resp UT	Fold change wrt WT UT
	WT promoter		6359
			6446	6402.5				0.931763		6871.38		1	1
	wt promoter tel short		2862
			2999	2930.5				0.688494		4256.39		0.619437	0.619437
	124 G>A mut prom.		14806
			14759	14782.5				1.63403		9046.67			1.31657
	124 G>A mut tel short		12451
			12449	12450				1.33415		9331.79		1.03152	1.35807
	146 G>A mut prom.		28273
			30024	29148.5				1.59272		18301.1			2.66338
	146 G>A mut tel short		19352
			18212	18782				0.885985		21199		1.15834	3.08511
			4292
	WT promoter		4707	4499.5				0.733415		6135			1
			3755
	wt promoter tel short		3881	3818				0.914933		4172.98		0.680193	0.680193
	124 G>A mut prom.		13316
			13928	13622				1.43237		9510.08			1.55014
	124 G>A mut tel short		14770
			14560	14665				1.2243		11978.3		1.25954	1.95245
	146 G>A mut prom.		30037
			28403	29220				1.51775		19252.2			3.13809
	146 G>A mut tel short		20868
			18020	19444				0.726744		26754.9		1.38971	4.36103
	WT promoter		5485											Normalised value of WT prom.		WT TEL		-124		-124 TEL
			5171	5328				0.825483		6454.4			1	6871.38		4256.39		9046.67		9331.79		18301.1		21199
	wt promoter tel short		3988											6135		4172.98		9510.08		11978.3		19252.2		26754.9
			4426	4207				1.13831		3695.83		0.572606	0.572606	6454.4		3695.83		8039.5		9740.2		25533.5		31321.5
														301.506		246.952		613.89		1163.33		3208.8		4139.06
	124 G>A mut prom.		14505
			14450	14477.5				1.8008		8039.5			1.24558
	124 G>A mut tel short		16978
			16761	16869.5				1.73195		9740.2		1.21154	1.50908
	146 G>A mut prom.		30456
			30887	30671.5				1.20122		25533.5			3.95599
	146 G>A mut tel short		28570
			29737	29153.5				0.930783		31321.5		1.22668	4.85273
											ut	TEL SHORT
							WT	1	1	1	1	0.624079
							124	1.31657	1.55014	1.24558	1.37076	1.34509
							146	2.66338	3.13809	3.95599	3.25249	4.17439
											TEL SHORT
							WT	0.619437	0.680193	0.572606	0.624079	0.00679392
							124	1.35807	1.95245	1.50908	1.60653	0.325012
							146	3.08511	4.36103	4.85273	4.09963	0.26787
