# Supplementary material for: Telomeres control human telomerase (TERT) expression through non-telomeric TRF2
Source: eLife. 2025 Sep 30;14:RP104045. doi: 10.7554/eLife.104045 (PMC12483519; doi:10.7554/eLife.104045)
Supplement: Figure 9—figure supplement 1—source data 1. [file elife-104045-fig9-figsupp1-data1.xlsx]

## Sheet: TRF2 PTM screening _ A and B
							Figure 6 supplementary figure1 a					Figure 6 supplementary figure1 b
				GAPDH			TRF2					hTERT
			HT1080 UT	21.5069			21.5651					31.2618
				21.6572	21.582		21.2755	21.4203	-0.161704			30.5177	30.8897	9.30769
			TRF2 SIL.	22.5927			28.5745					30.9868
				22.8012	22.6969		28.5016	28.538	5.84111	6.00282	0.0155945	31.2183	31.1025	8.40561	-0.902076	1.86875
			TRF2 SIL. +R17H	23.4371			13.2099					31.1458
				23.9203	23.6787		13.0435	13.1267	-10.552	-10.3903	1342.09	31.1938	31.1698	7.49112	-1.81657	3.52243
			TRF2 sil +K176R	21.8777			14.909					30.1651
				21.7846	21.8311		14.8738	14.8914	-6.9397	-6.778	109.744	30.3035	30.2343	8.40315	-0.904535	1.87194
			TRF2 SIL. +T188N	23.2725			12.7167					31.4958
				22.7793	23.0259		12.764	12.7403	-10.2856	-10.1239	1115.8	31.6181	31.557	8.53106	-0.776622	1.71311
			TRF2 SIL. + K190R	22.5066			12.7783					31.9698
				22.5488	22.5277		12.5899	12.6841	-9.84362	-9.68191	821.384	32.6662	32.318	9.79033	0.482644	0.715665
			TRF2 sil. + TRF2 WT	20.9654			12.4463					30.7398
				20.6468	20.8061		12.5998	12.523	-8.28305	-8.12135	278.464	30.8661	30.8029	9.99687	0.689185	0.620204
				GAPDH			TRF2					hTERT
			HT1080 UT	21.044			29.3151					29.4232
				20.5196	20.7818		28.0668	28.0668	7.28505			30.2256	29.8244	9.04263
			TRF2 SIL.	20.0183			28.3078					28.8499
				20.512	20.2651		28.0995	28.2037	7.93852	0.653469	0.63575	28.8005	28.8252	8.56007	-0.482558	1.39722
			TRF2 SIL. + WT	20.9727			12.8451					31.1879
				20.1465	20.5596		12.9702	12.9077	-7.65193	-14.937	31367.4	29.8436	30.5157	9.95612	0.913495	0.530897
			TRF2 SIL. +R17H	19.728			14.3849					25.5276
				18.6117	19.1699		15.9654	15.1751	-3.99478	-11.2798	2486.38	25.7506	25.6391	6.46917	-2.57345	5.95233
			TRF2 sil +K176R	20.9636			20.8099					29.4755
				21.4199	21.1918		21.0017	20.9058	-0.285995	-7.57104	190.156	29.3276	29.4016	8.20981	-0.832817	1.78116
			TRF2 SIL +T188N	20.7397			14.8465					30.8005
				20.6357	20.6877		14.8212	14.8339	-5.85385	-13.1389	9019.87	32.408	31.6043	10.9166	1.87395	0.272826
			TRF2SIL. K190R	20.6963			14.8199					29.8996
				20.9801	20.8382		14.7576	14.7888	-6.04942	-13.3345	10329.4	28.9707	29.4351	8.59694	-0.445693	1.36197
				GAPDH			TRF2					hTERT
			HT1080 UT	16.7848			27.5738					26.6797
				16.7069	16.7458		25.6845	26.6292	5.06401			26.5674	26.6235	9.87769
			TRF2 SIL.	17.5055			28.6471					27.3794
				17.4902	17.4978		28.4517	28.5494	11.0515	5.98753	0.0157606	27.4351	27.4073	9.90941	0.0317249	0.97825
			TRF2 sil. + R17H	17.4893			12.8174					25.8107
				18.0833	17.7863		12.7354	12.7764	-5.00992	-10.0739	1077.85	25.8357	25.8232	8.03686	-1.84083	3.58215
			TRF2 sil. + K176R	17.6685			18.0692					26.7416
				17.2977	17.4831		17.4436	17.7564	0.27334	-4.79067	27.6781	26.5899	26.6658	9.18267	-0.695019	1.61891
			TRF2 sil. + T188N	17.0433			10.3429					28
				17.1863	17.1148		10.8055	10.5742	-6.54057	-11.6046	3114.05	27.3788	27.6894	10.5746	0.696911	0.616892
			TRF2 sil. + K190R	16.7641			14.0896					26.7921
				16.8454	16.8047		14.0797	14.0846	-2.7201	-7.78411	220.42	26.8051	26.7986	9.99382	0.116131	0.922659
			TRF2 sil. + WT	17.3438			11.389					28.5044
				17.5375	17.4407		11.4686	11.4288	-6.0119	-11.0759	2158.65	28.2386	28.3715	10.9309	1.05317	0.481909
				TERT				TRF2
			HT1080 UT	1	1	1		1	1	1
			TRF2 SIL.	1.86875	1.39722	0.97825		0.0155945	0.63575	0.0157606
			TRF2 SIL. + WT	0.468515	0.530897	0.481909		278.464	31367.4	2158.65
			TRF2 SIL. +R17H	3.52243	5.95233	3.58215		1342.09	2486.38	1077.85
			TRF2 sil +K176R	1.78116	1.61891	1.87194		190.156	27.6781	109.744
			TRF2 SIL +T188N	1.71311	0.272826	0.616892		3114.05	9019.87	1115.8
			TRF2SIL. K190R	0.715665	1.36197	0.922659		220.42	10329.4	821.384

## Sheet: DOX dose dependent  D
										Figure 6 supplementary figure1 D				Figure 6 supplementary figure1 D
							GAPDH			TRF2				TERT 15/16
					UT		19.3251			25.056				28.2661
							19.4206			25.1283				28.3404
							19.0643	19.27		24.9236	25.036	5.766		28.4428	28.3498	9.07981
					0.2		18.5139			22.1924		0		27.6627		0
				WT			18.2967			22.2513		1		27.9415
							18.534	18.4482		22.1163	22.1867	3.73845		27.8271	27.8104	9.36223
					0.4		22.9934			26.6557		-2.02755		32.4975		0.28242
							22.9879			26.5548		4.07711		33.2791		0.822211
							23.069	23.0167		26.6288	26.6131	3.59636		32.6362	32.8043	9.78754
					0.6		18.7382			21.9813		-2.16963		27.6487		0.707735
							18.4482			22.0227		4.4991		27.9558		0.612281
							18.4347	18.5404		22.0549	22.0196	3.47923		27.8013	27.8019	9.26153
					1		19.6503			22.174		-2.28677		28.2215		0.181724
							19.3306			22.2175		4.87962		28.2801		0.881649
							19.3787	19.4532		22.1767	22.1894	2.7362		28.889	28.4635	9.01032
					UT		17.8008			24.512		-3.0298		26.678		-0.0694829
							17.7262			24.2365		8.16696		26.6133		1.04934
							17.6996	17.7422		24.3879	24.3788	6.63661		26.6659	26.6524	8.91021
					0.2		17.6799			21.6959		0		25.6963		0
							17.2932			21.7252		1		25.6755		1
				R17H			17.5456	17.5062		21.7089	21.71	4.20378		25.6312	25.6677	8.16149
					0.4		17.5082			21.3736		-2.43284		25.4168		-0.748719
							17.6631			21.4146		5.39953		25.6693		1.6803
							17.5127	17.5613		21.1657	21.3179	3.75662		25.7795	25.6219	8.06053
					0.6		18.1381			21.6299		-2.87999		26.417		-0.849675
							18.1748			21.578		7.36148		26.4455		1.8021
							18.1222	18.145		21.6237	21.6105	3.4655		26.431	26.4312	8.28612
					1		20.0618			23.331		-3.17111		26.9929		-0.624093
							19.8103			23.3739		9.00741		26.7971		1.54124
							20.0826	19.9849		23.2189	23.308	3.32307		26.9987	26.9296	6.94466
												-3.31354				-1.96555
												9.94206				3.90561
										Figure 6 supplementary figure1 D				Figure 6 supplementary figure1 D
							GAPDH			TRF2				TERT 15/16
					ut		15.65			22.1				23.42
							15.66			22.1				23.4
							15.56	15.6233		22.04	22.08	6.45667		23.39	23.4033	7.78
				WT	0.2		16.61			19.24				23.91
							16.55			19.34				24.01
							16.71	16.6233		19.41	19.33	2.70667		23.76	23.8933	7.27
					0.4		16.67			19.44		-3.75		24.53		-0.51
							16.85			19.44		13.4543		24.46		1.42405
							16.77	16.7633		19.38	19.42	2.65667		24.39	24.46	7.69667
					0.6		15.99			18.37		-3.8		23.85		-0.0833333
							15.87			18.48		13.9288		23.58		1.05946
							16.11	15.99		18.35	18.4	2.41		23.55	23.66	7.67
					1		14.1			17.92		-4.04667		23.64		-0.11
							15.67			17.76		16.526		23.76		1.07923
							13.37	14.885		17.63	17.77	2.885		23.49	23.63	8.745
												-3.57167				0.965
												11.8899				0.512278
							GAPDH			TRF2				TERT 15/16
					ut		17.0263			24.8068				26.4241
							16.9966			24.762				26.4616
							17.0386	17.0205		24.7051	24.758	7.73747		26.3673	26.4177	9.39716
					0.2		17.2722			22.6297				25.5556
							17.2438			22.66				25.4882
							17.3442	17.2867		22.593	22.6276	5.34081		25.3409	25.4616	8.17482
				R17H	0.4		17.2741			23.3912		-2.39666		25.2019		-1.22234
							17.2095			23.0881		5.26582		25.1485		2.33326
							17.2083	17.2306		23.0179	23.1657	5.9351		25.2295	25.1933	7.96263
					0.6		17.2859			21.527		-1.80237		25.0998		-1.43453
							17.4309			21.5075		3.48792		25.1039		2.70295
							17.3691	17.362		21.4683	21.5009	4.13896		25.6878	25.2972	7.93521
					1		17.6245			21.0902		-3.59851		25.2424		-1.46196
							17.3977			21.0869		12.1132		25.1058		2.75482
							17.5113	17.5112		20.9953	21.0574	3.54625		25.0773	25.1418	7.63064
												-4.19121				-1.76653
												18.2676				3.40234

## Sheet: HMT assay bead control F
				Abs	avg
			no prc2 ctrl	0.1498
				0.0998	0.1248
			only prc2 ctrl	0.1538
				0.1526	0.1532
			only bead ctrl	0.1444
				0.1438	0.1441
			r17h +prc2	0.1561
				0.1538	0.15495
			trf2 wt +prc2	0.3613
				0.3941	0.3777
				Abs	avg
			no prc2	0.1018
				0.0738	0.0878
			prc2 ctrl	0.1047
				0.1038	0.10425
			only bead+prc2	0.0795
				0.0787	0.0791
			r17h	0.1079
				0.1078	0.10785
			trf2 wt	0.1353
				0.1356	0.13545
				450nm
				Abs	avg
				0.0526
			NO PRC2	0.0527	0.05265
				0.0939
			ONLY PRC2	0.0987	0.0963
				0.1416
			TRF2 WT	0.1245	0.13305
				0.0756
			R17H	0.0787	0.07715
				0.0896
			BEAD ONLY	0.0748	0.0822
				Abs	avg
			neg control	0.1224
				0.1224	0.1224
			PRC2 only	0.1712
				0.1534	0.1623
			PRC2+TRF2(bead bound)	0.34
				0.2548	0.2974
			PRC2+empty beads	0.1163
				0.1173	0.1168
				0.1675
			PRC2 +R17H (bead bound)	0.1793	0.1734
				ABS	AVG
				0.093
			NO PRC2	0.0968	0.0949
				0.1034
			R17H TRF2	0.1059	0.10465
				0.1048
			ONLY PRC2	0.1067	0.10575
				0.1008
			ONLY BEAD	0.1155	0.10815
				0.2153
			TRF2 WT +PRC2	0.2168	0.21605
				ABS	AVG
				0.1347
			NO PRC2	0.1537	0.1442
				0.145
			ONLY PRC2	0.1491	0.14705
				0.2153
			TRF2 WT +PRC2	0.2168	0.21605
				0.1675
			R17H +PRC2	0.1793	0.1734
				0.135
			ONLY BEAD	0.1502	0.1426
				No prc2	only prc2	prc2 +wt	prc2+r17h	prc2+bead
				0.1248	0.1532	0.3777	0.15495	0.1441
				0.0878	0.10425	0.13545	0.10785	0.0791
				0.05265	0.0963	0.13305	0.07715	0.0822
				0.1224	0.1623	0.2974	0.10465	0.1168
				0.0949	0.10575	0.21605	0.1734	0.10815
			average	0.09651
				1.29313	1.5874	3.91358	1.60553	1.49311
				0.90975	1.0802	1.40348	1.1175	0.819604
				0.545539	0.997824	1.37861	0.799399	0.851725
				1.26826	1.68169	3.08155	1.08434	1.21024
				0.983318	1.09574	2.23863	1.7967	1.12061
			avg	1	1.28857	2.40317	1.2807	1.09906
