# Supplementary material for: Telomeres control human telomerase (TERT) expression through non-telomeric TRF2
Source: eLife. 2025 Sep 30;14:RP104045. doi: 10.7554/eLife.104045 (PMC12483519; doi:10.7554/eLife.104045)
Supplement: Figure 9—source data 1. [file elife-104045-fig9-data1.xlsx]

## Sheet: IND. TRF2 PTM SYSTEM  A
								NOT PLOTTED IN GRAPH BUT KEPT FOR INDUCTION CONFIRMATION
	HT1080
					GAPDH			TRF2			TERT 15/16
				WT UT 1				23.362			24.2629
	TRf2				17.4221			23.4048			24.323
	wt	r17h			17.1632	17.2926		23.2479	23.3383	6.04561	24.4896	24.3585	7.06587
	11.6995	4.55414		WT UT 2	17.3201			23.24			24.4761				ht1080
	5.39371	2.48552			17.2351			23.1925			24.4111
	11.8711				20.734	17.2776		23.0419	23.1581	5.88055	24.3318	24.4063	7.12875		wt	r17h
				WT IND 1	16.8065			19.4294			24.173				0.842907	2.67664	1
					17.0612			19.2775			24.176				0.459657	3.90561	1
					16.7096	16.8591		19.3621	19.3563	2.49724	24.1655	24.1715	7.31242		0.508894	2.55363	1
				WT IND 2	17.0784			20.4813		-3.54837	25.3702		0.246555
					17.0632			20.5559		11.6995	25.3619		0.842907
					17.0664	17.0693			20.5186	3.44927	25.2263	25.3195	8.25012
										-2.43128			1.12137
										5.39371			0.459657
					GAPDH			TRF2			TERT 15/16
				R17H UT	19.1503			24.3476			27.0265
					19.2428			24.389			27.0111
					19.1804	19.1912		24.2884	24.3416	5.15046	26.7482	26.9286	7.73742
				R17H IND	19.2212			22.1651			25.5057
					19.146			22.1027			25.5281
					19.0038	19.1237		21.9929	22.0869	2.96328	25.2881	25.4406	6.31699
										-2.18718			-1.42042
										4.55414			2.67664
					GAPDH			TRF2			TERT 15/16
				R17H UT	17.8008			24.512			26.678
					17.7262			24.2365			26.6133
					17.6996	17.7422		24.3879	24.3788	6.63661	26.6659	26.6524	8.91021
				R17H IND	18.0618			23.331			24.9929
					17.8103			23.3739			24.7971
					18.0826	17.9849		23.2189	23.308	5.32307	24.9987	24.9296	6.94466
										-1.31354			-1.96555
										2.48552			3.90561
					GAPDH			TRF2			TERT 15/16
				WT ut	15.6469			22.1026			23.4167
					15.663			22.1042			23.3977
					15.5635	15.6245		22.0403	22.0824	6.45792	23.3888	23.4011	7.77662
				WT ind.	14.0962			17.924			23.6431
					15.6654			17.758			23.7588
					13.372	14.8808		17.626	17.7693	2.88854	23.4941	23.632	8.75118
										-3.56938			0.974562
										11.8711			0.508894
					GAPDH			TRF2			TERT 15/16
				R17H UT	17.6056			23.9054			22.3499
					17.434			23.9095			22.2884
					20.8208	17.5198		26.083	23.9074	6.38765	22.6078	22.4154	4.89559
				R17H IND	17.4231			24.1134			21.9569
					17.7134			24.3255			21.0867
					18.3294	17.822		24.373	24.2706	6.44868	21.0514	21.365	3.54304
										0.0610314			-1.35255
													2.55363
			HCT116
					GAPDH			TRF2			15/16 TERT
				HCT TRF2 WT IND UT	17.6037			24.039			30.7674
	TRF2				17.7667			24.0353			30.9742
	6.04417	8.0702			17.4877	17.6194		24.0459	24.04	6.42067	31.1279	30.9565	13.3371		hct116
	1.86715	2.75991		HCT TRF2 WT IND 1UG/ML	18.4767			22.0873			32.6953
	1.56295	1.80024			18.129			22.0958			32.8427				wt	r17h
					18.2336	18.2798		22.1316	22.1049	3.82513	32.7453	32.7611	14.4813		0.452444	4.01623	1
				HCT TRF2 R17H IND UT	17.9921			25.0585		-2.59554	31.8691		1.14419		0.334531	1.53947	1
					18.1878			25.1634		6.04417	33.116		0.452444		1.31943	5.22821	1
					18.0577	18.0792		24.9605	25.0608	6.98161	32.7687	32.9424	14.8632		0.391752	0.0751482
				HCT TRF2 R17H IND 1UG/ML	17.9904			22.0256			30.804
					18.1061			21.911			30.6541
					17.8846	17.9937		21.9515	21.9627	3.96901	31.095	30.851	12.8573
										-3.0126			-2.00584
										8.0702			4.01623
					GAPDH			TRF2			EXON 15/16
				WT UT HCT 1	18.6152			23.1925			28.9825
					18.4235			22.9495			28.8461
					18.5462	18.5283		23.1136	23.0852	4.5569	29.3681	29.0656	10.5373
				WT IND HCT 1	19.4437			23.1229			31.8862
					19.3776			23.0761			31.2692
					19.4782	19.4332		23.0687	23.0892	3.65606	31.4952	31.5502	12.117
										-0.900841			1.57979
										1.86715			0.334531
				WT UT HCT 2	19.039			24.4787			31.6515
					19.111			24.2661			31.0874
					19.2138	19.1213		24.8405	24.5284	5.40719	32.3888	31.3694	12.2482
				WT IND HCT 2	19.7837			24.6008			31.4282
					19.5207			24.2955			31.6622
					19.7178	19.6741		24.4148	24.437	4.76291	31.4767	31.5224	11.8483
										-0.644275			-0.399912
										1.56295			1.31943
					GAPDH			TRF2			EXON 15/16
				R17H UT HCT 1	21.4696			25.4757			31.1237
					21.4483			25.4735			31.0265
					21.4214	21.4465		25.3828	25.444	3.99755	31.2342	31.1282	9.68169
				R17H IND HCT 1	22.9515			24.9105			31.3713
					21.6838			24.4145			30.9051
					21.5703	22.0685		24.4793	24.6014	2.53292	31.1069	31.1278	9.05926
										-1.46462			-0.62243
										2.75991			1.53947
				R17H UT HCT 2	19.6716			23.7243			28.9752
					19.7738			23.5618			29.376
					19.56	19.6685		23.4952	23.5937	3.92529	29.5884	29.4822	9.81373
				R17H IND HCT 2	18.949			22.0463			26.417
					19.0016			22.0118			26.4455
					19.0606	19.0037		22.1844	22.0808	3.0771	26.431	26.4312	7.42742
										-0.848193			-2.38632
										1.80024			5.22821
		MDAMB 231
						GAPDH		TRF2			EXON 15/16
Trf2 induction				MD WT UT		20.5628		25.1184			30.7247
	wt	r17h				20.4565		25.0071			31.262
	1.62861	8.32452				20.6173	20.5455	25.2084	25.1113	4.56577	30.2739	30.9933	10.4478
	5.27975	9.10047		MD WT IND		20.4057		24.3392			31.454
	17.7155	12.0097				20.6308		24.219			31.4282						wt	r17h
						20.554	20.5302	24.6187	24.3923	3.86213	31.7924	31.5582	11.028				0.668868	5.80289
				R17H UT MD		20.4035		25.5661		-0.703639			0.580206				0.789191	3.41111
						20.5311		25.5408		1.62861	31.1483		0.668868				0.71342	7.34597
						20.4217	20.4521	25.7084	25.6051	5.15299	30.7249	30.9366	10.4845
				R17H IND MD		22.1147		24.0915			29.5329
						21.8		24.0859			30.1742
						22.833	21.9574	23.9817	24.053	2.09563	30.0081	29.9051	7.9477
										-3.05737			-2.53677
										8.32452			5.80289
						gapdh		trf2			tert 15/16
				wt ut 1		22.3029		27.2398			32.3666
						22.2117		26.9194			32.0089
						22.1319	22.2155	26.9484	27.0359	4.82036	31.7737	32.0497	9.83422
				wt dox 1		21.3775		23.7163			31.4136
						21.3487		23.5404			31.6641
						25.6819	21.3631	24.0922	23.783	2.41989	30.7254	31.5388	10.1758
				wt ut 2		20.975		26.1007		5.27975	31.1602		0.789191
						21.0324		26.2199			30.5811
						21.0659	21.0244	26.0433	26.1213	5.09688	30.3793	30.7069	9.68243
				wt dox 2		23.4562		24.2969			33.4652
						23.2735		24.3046			33.0824
						23.1233	23.2843	24.1013	24.2343	0.949936	33.8142	33.4539	10.1696
				r17h ut 1		21.3244		26.3646		17.7155	31.4039		0.71342
						21.4729		26.8936			30.4719
						21.0287	21.2753	26.3175	26.5252	5.2499	31.407	31.4054	10.1301
				r17h dox 1		21.8603		23.7645			30.2424
						21.8464		23.8603			33.5996
						21.4259	21.7109	23.6997	23.7748	2.06396	29.8991	30.0707	8.35986
				r17h ut 2		20.5819		26.1029		9.10047	31.2181		3.41111
						20.6981		26.0075			31.8071
						20.6145	20.6315	26.0339	26.0481	5.41657	31.5112	31.5121	10.8806
				r17h dox 2		21.4856		23.4582			29.6745
						21.7066		23.7728			30.1725
						22.3462	21.8461	23.7987	23.6766	1.83045	29.7023	29.8498	8.00365
										12.0097			7.34597

## Sheet: FLAG ChIP  C
			0-300bp			GAPDH			TELOMERE
UT		FLAG	29.8191			31.1794			16.8469
negative control)			29.5017	29.6604	0.677336	31.1223	31.1508	0.50649	16.8516	16.8493	0.782015
		IGG	29.1897			30.3112			16.4872
			29.007	29.0983		30.0277	30.1695		16.5019	16.4945
			0-300bp			GAPDH			TELOMERE
		FLAG	29.1203			31.9587			17.95
			29.0106	29.0655	1.44033	30.8985	31.4286	0.514047	17.49	17.72	0.450625
		IGG	29.4931			30.5032			16.28
			29.6906	29.5919		30.434	30.4686		16.86	16.57				0.677336	0.782015
														1.44033	0.450625
			0-300bp			GAPDH			TELOMERE					0.00979181	1.24435
		UT FLAG	37.7654			31.1397			13.9322
						32.806			13.8835
0.50649			38.2289	37.9972	6.67421	32.3658	32.5859	-0.286883	14.0208	13.9455	1.24435
0.514047		UT IgG	31.2019		0.00979181	32.5288		1.22	14.3399
1.22			31.58			32.7168			14.3918
			31.187	31.323		33.3727	32.8728		14.051	14.2609
		UT Input	31.8535			33.1218			13.9986
			32.0337			32.962			13.9997
			31.7797	31.889		32.2075	32.7638		13.9336	13.9773
			0-300bp			GAPDH				TELOMERE
WT TRF2		WT 1 FLAG	28.9678			31.2931				15.8408
			28.8288	28.8983	-0.448388	31.8623	31.5777	0.0136547		15.5206	15.5206	-1.41307
		WT IGG 1	29.3328		1.36452	31.7425		0.99058		16.8936		2.66304
			29.3606	29.3467		31.3856	31.564			16.9736	16.9336
			0-300bp			GAPDH				TELOMERE					1.36452	2.66304
		WT FLAG 2	28.7678			30.6186				15.3729					2.43935	3.11197
			28.7835	28.7757	-1.2865	30.559	30.5888	-0.10763		15.137	15.255	-1.63783			2.51975	1.98488
		WT IGG 2	30.004		2.43935	30.5857		1.07746		16.8463		3.11197
0.99058			30.1204	30.0622		30.8072	30.6965			16.9393	16.8928
1.07746
1.15892			0-300bp			GAPDH				TELOMERE
		WT FLAG	32.1305			32.0623				13.6014
			32.8856			31.8069				13.6371
			31.4925	32.5081	-1.33328	32.3924	31.9346	-0.212785		13.6059	13.6148	1.98488
		WT IgG	33.6316		2.51975	31.8961		1.15892		14.0154
			34.1648			32.2828				14.9128
			33.7276	33.8413		32.2632	32.1474			14.8833	14.6039
		WT Input	35.4836			31.8788				14.2057
			33.2147			32.1292				14.1863
			36.4346	35.9591		32.1442	32.0508			15.1546	14.5155
			0-300bp			GAPDH				TELOMERE
TRF2 R17H		FLAG	29.0908			30.5926				16.5556
			28.9938	29.0423	0.926322	30.956	30.7743	0.193296		16.2549	16.4052	-1.07617
		IGG	28.1901		0.526198	30.3335		0.874605		17.9124		2.10843
			28.0419	28.116		30.8284	30.581			17.0504	17.4814
															0.526198	2.10843
															0.326807	10.6556
															0.304569	3.25653
			peak			gapdh				TELOMERE
		r17h flag	30.6561			30.0166				11.715
			30.3654			29.6707				11.4004
			30.608	30.5432	1.61349	30.9619	30.2164	0.699428		11.5226	11.5226	-3.41354
		mouse igg	29.0067		0.326807	29.3405		0.615816		15.0086		10.6556
			28.6742			29.2533				14.7645
			29.1082	28.9297		29.957	29.5169			14.9362	14.9362
		r17h input	31.2683			30.2868				15.7086
			31.3755			30.4855				15.868
			31.568	31.4039		30.2467	30.3397			15.5323	15.5323
0.874605
0.615816
0.692555			peak			gapdh				TELOMERE
		R17H FLAG	31.6781			31.2				12.68
			32.1584			30.53	30.87	0.53		12.46
			32.2897	32.0421	1.71516	30.29		0.692555		12.35	12.4967	3.25653
		R17H IgG	30.3823		0.304569	30.39	30.34			14.11
			30.3726			30.29				14.29
			30.2258	30.3269		30.09	30.19				14.2
		R17H Input	31.6919			34.3643				13.74
			32.08			33.2901				13.6
			31.5286	31.7668	28.4468	32.1018	32.696	29.376		13.73	13.69

## Sheet: REST D
		R17H													WT
				0-300bp			gapdh			synapsin							0-300bp			gapdh			synapsin
			r17h rest	30.6977			30.164			29.13						wt rest	28.7776			30.1071			32.1913
				31.5681			0			29.0236							28.8381			30.1089			33.98
				31.0087	31.0915	1.87948	29.3254	29.7447	0.312511	29.1043	29.086	14.2955					28.8706	28.8288	-1.20174	29.8369	30.0176	0.187022	33.0076	32.5995	-1.3154
	24 9 20		r17h rbigg	29.285		0.271782	29.7311		0.805239	30.2911		2.49888				r igg wt	30.0684		2.30017	29.6368		0.878417	33.6852		2.48871
				29.3099			29.2422			30.5234							29.8933			29.6139			35.9507
				29.0411	29.212		29.3234	29.4322		0	30.4073	5.72079					30.1298	30.0305		30.2412	29.8306		34.1445	33.9149
			r17h input	34.8056			29.5814			29.4683						wt input	29.2008			30.5452			31.7376
				33.6702			29.2955			29.8732							29.0446			30.3687			31.2929
				34.7013	34.3924		30.3265	29.7345		29.4574	29.5996	26.2796					29.2336	29.1597		30.9292	30.6144		31.0724	31.3676
																	0-300bp			gapdh			synapsin
				peak			gapdh			synapsin						wt rest	30.3158			29.605			27.1882
			r17h rest	31.8018			30.8344			29.1722							30.4861	30.401	-1.17419	29.4297	29.5173	0.284634	27.1825	27.1854	-1.42381
	10 10 20			32.2545			30.3723			28.6699						r igg wt	31.6436		2.25666	29.2932		0.82095	28.4741		2.68292
				32.0016	32.0193	2.84541	30.0522	30.4196	0.792758	28.8148	28.8856	-1.41181					31.5067	31.5752		29.1722	29.2327		28.7443	28.6092
			rabbit igg	29.2619		0.139138	29.5465		0.577239	30.5362		2.66071				input	30.6419			28.6699			28.7434
				29.0834			29.4897			30.1306							30.6802	30.661		28.8148	28.7424		28.7542	28.7488
				29.1764	29.1739		29.8444	29.6269		30.2256	30.2975
			r17h input	31.2683			30.2868			32.0295
				31.3755			30.4855			32.3659
				31.568	31.4039		30.2467	30.3397		32.6682	32.3545						0-300bp			gapdh			synapsin
																wt rest	30.6925			30.7156			27.3987
				0-300bp			GAPDH			synapsin							30.1012	30.3968	-2.12679	31.0844	30.9	0.80964	27.6249	27.5118	-1.13477
			R17H REST	30.6925			34.1928			32.4199						r igg wt	32.7159		4.36744	30.4861		0.570524	28.6864		2.19583
				30.1012	30.3968	-0.503176	34.907	34.5499	-0.303205	32.3703	32.3951	2.36402					32.3313	32.5236		29.6946	30.0904		28.6067	28.6465
						1.41733			1.23388							input	33.249			29.9594			28.1924
			IgG	30.7156			34.8879			33.8573	33.6363						31.9658	32.6074		29.5264	29.7429		28.4657	28.329
				31.0844	30.9		34.8183	34.8531		33.4154
											0-300	synapsin	gapdh
											0.271782	2.49888	0.805239						2.30017	2.48871	0.878417
											0.139138	2.66071	0.577239						2.25666	2.68292	0.82095
											1.23388	2.36402	1.74497						4.36744	2.19583	0.570524

## Sheet: EZH2  E
	wt																r17h
			0-300bp			gapdh					CCND2								0-300bp			gapdh				CCND2
		WT EZH2	27.8584			36.2143					33.3932							ezh2	30.0931			30.1645				28.7065
			27.7894			35.5339					34.8018								30.617			29.9644				28.8451
			27.8276	27.8251	-1.36546	36.1527	35.967	-0.236191			32.613	33.6027	-1.27604						30.3432	30.3511	1.17724	29.9437	30.0242	0.397329		29.9123	29.1546	-1.95407
		WT IgG	29.1905		2.57658	38.4344		1.17788			34.7459		2.42174					igg	29.2619		0.442197	29.5465		0.759263		30.7202		3.87467
			29.1562			36.9016					34.7946								29.0834			29.4897				31.1988
			29.2251	29.1906		35.5047	36.2032				35.0957	34.8787							29.1764	29.1739		29.8444	29.6269			31.4071	31.1087
		WT Input	31.2531			34.1689					33.0766
			31.0099			35.8166					32.6687
			30.3986	30.8872		37.2949	34.9927				33.675	33.1401
			0-300bp				Gapdh				CCND2								0-300bp				Gapdh				CCND2
		WT EZH2	31.7921				37.5842				31.8131							R17H EZH2	31.4946				33.8577				32.6178
			31.3655				33.6998				32.3675								32.3277				33.5227				32.3008
			31.351	31.5029	-1.87627		33.1672	33.4335	1.00865		31.7199	31.9668	-1.05706						30.8265	31.5496	0.244588		35.2435	33.6902	1.22863		31.1653	32.0279	-0.934482
		WT IgG	33.061		3.67124		32.6433		0.497011		32.7003		2.08068					R17H IgG	31.2161		0.844057		32.2483		0.426721		34.5601		1.9112
			33.1726				32.2064				33.9868								31.13				32.4038				33.038
			33.9038	33.3791				32.4249			32.3846	33.0239							31.569	31.305			32.7325	32.4615			32.8869	32.9624
		WT Input	31.5147				28.0616				28.8067							R17H Input	29.0668				30.8838				32.622
			31.104				28.1295				28.6318								28.8276				30.0903				32.0707
			32.1391	31.5859			28.1861	28.1257			28.6284	28.689							28.8746	28.923			30.3674	30.4472			33.417	32.7032
			0-300bp			Gapdh					CCND2								0-300bp			Gapdh					CCND2
		WT EZH2	33.4841			34.8829					32.5973							R17H EZH2	30.8881			32.8626					34.0642
			35.0987			35.1543					33.83								31.3266			33.6947					34.3488
			34.4286	34.3372	-2.65346	37.2461	35.7611	-0.30631			33.9147	33.4473	-0.676595						30.8255	31.0134	-0.422824	34.4784	33.6786	0.802114			34.7639	34.3923	-1.69865
		WT IgG	38.2979		6.29175	36.0572		1.23654			34.1207		1.59836					R17H IGG	31.4071		1.34055	32.7105		0.573508			35.4552		3.24597
			37.2503			35.5724					33.6209								31.2421			32.4289					36.8737
			35.4237	36.9906		36.5726	36.0674				34.6301	34.1239							31.6594	31.4362		33.49	32.8765				35.944	36.091
		WT Input	36.693			34.2608					30.1248							R17H INPUT	33.2201			29.5798					32.5405
			34.724			33.4663					30.8412								32.6296			29.1681					33.0434
			35.4728	35.63		34.7329	34.1534				30.167	30.3777							33.2753	33.0417		29.9725	29.5735				32.4268	32.6703
					2.57658	0.497011	2.42174
					3.67124	0.708573	2.08068
					6.29175	1.17788	1.59836														0.442197	0.759263	3.87467
																					0.844057	0.426721	1.9112
																					1.34055	0.573508	3.24597

## Sheet: H3K27me3  F
	WT TRF2														R17H TRF2
			0-300bp			GAPDH											0-300bp			GAPDH
		wt h3	30.9312			28.9884										R1H H3	32.0861			34.3671
			30.3867			29.3608											31.753			35.0157
			30.3302	30.5494		29.5498	29.2997										31.6138	31.8176		34.3766	34.5865
		wt h3k27me3	29.1701			30.2768										R17H H3K27ME3	31.4117			36.3146
			28.8149			30.515											31.3184			36.0044
			29.1028	29.0293	-1.5201	30.5737	30.4551	1.15548									31.1336	31.2879	-0.529742	36.069	36.1293	1.54285
		wt input	31.8474		2.86812	30.4489		0.448917								R17H INPUT	33.3093		1.44367	32.7282		0.343207
			31.8889			30.1949											33.5135			32.4823
			32.2015	31.9793		29.7574	30.1337										33.9097	33.5775		33.0937	32.7681
			0-300bp			GAPDH
		FLAG H3	31.7131			33.0077											0-300bp			GAPDH
			31.7519			32.9853										R17H H3	29.0815			32.287
			32.508	31.991		45.6589	32.9965										29.634	29.3578		32.8986	32.5928
		FLAG H3K27ME3	30.5615			35.8614										R17H H3K27me3	31.5961			36.7762
			30.7441			34.9026											31.3771	31.4866	2.12886	37.6625	37.2194	4.62659
			31.3489	30.8849	-1.10616	34.0548	34.9396	1.94311											0.228638			0.0404815
		FLAG INPUT	35.6701		2.15271	32.1386		0.260056
			34.0622			32.0337
			34.3379	34.6901		32.9372	32.3698										0-300bp			GAPDH
																R17H H3	29.3602	29.3615		31.7917	32.697
																	29.3629			33.6024
																R17H H3K27me3	31.482	31.6812	2.31963	34.4593	35.3281	2.63105
			0-300bp			GAPDH											31.8804		0.200318	36.1969		0.161426
		FLAG H3	32.4181			35.3605										R17H INPUT	31.0608	30.9904		30.855	31.1486
			32.5075			33.8251											30.9201			31.4421
			31.9641	32.2966		34.7887	34.6581
		FLAG H3K27ME3	30.3827			34.3399
			31.4481			34.2223
			30.9057	30.9122	-1.38442	36.3068	34.9563	0.298239
		FLAG INPUT	32.0533		2.61066	33.4527		0.813244
			33.1047			32.5128
			32.3725	32.5102		32.1161	32.6939
																				1.44367	0.343207
					2.86812	0.448917														0.228638	0.0404815
					2.15271	0.260056
					2.61066	0.813244

## Sheet: in vitro HMT assay G
				Abs	avg
			no prc2 ctrl	0.1498
				0.0998	0.1248
			only prc2 ctrl	0.1538
				0.1526	0.1532
			only bead ctrl	0.1444
				0.1438	0.1441
			r17h +prc2	0.1561
				0.1538	0.15495
			trf2 wt +prc2	0.3613
				0.3941	0.3777
				Abs	avg
			no prc2	0.1018
				0.0738	0.0878
			prc2 ctrl	0.1047
				0.1038	0.10425
			only bead+prc2	0.0795
				0.0787	0.0791
			r17h	0.1079
				0.1078	0.10785
			trf2 wt	0.1353
				0.1356	0.13545
				450nm
				Abs	avg
				0.0526
			NO PRC2	0.0527	0.05265
				0.0939
			ONLY PRC2	0.0987	0.0963
				0.1416
			TRF2 WT	0.1245	0.13305
				0.0756
			R17H	0.0787	0.07715
				0.0896
			BEAD ONLY	0.0748	0.0822
				Abs	avg
			neg control	0.1224
				0.1224	0.1224
			PRC2 only	0.1712
				0.1534	0.1623
			PRC2+TRF2(bead bound)	0.34
				0.2548	0.2974
			PRC2+empty beads	0.1163
				0.1173	0.1168
				0.1675
			PRC2 +R17H (bead bound)	0.1793	0.1734
				ABS	AVG
				0.093
			NO PRC2	0.0968	0.0949
				0.1034
			R17H TRF2	0.1059	0.10465
				0.1048
			ONLY PRC2	0.1067	0.10575
				0.1008
			ONLY BEAD	0.1155	0.10815
				0.2153
			TRF2 WT +PRC2	0.2168	0.21605
				ABS	AVG
				0.1347
			NO PRC2	0.1537	0.1442
				0.145
			ONLY PRC2	0.1491	0.14705
				0.2153
			TRF2 WT +PRC2	0.2168	0.21605
				0.1675
			R17H +PRC2	0.1793	0.1734
				0.135
			ONLY BEAD	0.1502	0.1426
								in Supplementary figure
				No prc2	only prc2	prc2 +wt	prc2+r17h	prc2+bead
				0.1248	0.1532	0.3777	0.15495	0.1441
				0.0878	0.10425	0.13545	0.10785	0.0791
				0.05265	0.0963	0.13305	0.07715	0.0822
				0.1224	0.1623	0.2974	0.10465	0.1168
				0.0949	0.10575	0.21605	0.1734	0.10815
			average	0.09651
				1.29313	1.5874	3.91358	1.60553	1.49311
				0.90975	1.0802	1.40348	1.1175	0.819604
				0.545539	0.997824	1.37861	0.799399	0.851725
				1.26826	1.68169	3.08155	1.08434	1.21024
				0.983318	1.09574	2.23863	1.7967	1.12061
			avg	1	1.28857	2.40317	1.2807	1.09906
