# Supplementary material for: Telomeres control human telomerase (TERT) expression through non-telomeric TRF2
Source: eLife. 2025 Sep 30;14:RP104045. doi: 10.7554/eLife.104045 (PMC12483519; doi:10.7554/eLife.104045)
Supplement: Figure 9—source data 2. [file elife-104045-fig9-data2.xlsx]

## Sheet: UT B
	label	area	mean
1	19 MAX_C1-tert mrna asg.lif - ut_Series001.jpg	155.243	56.329	0	115
2	19 MAX_C1-tert mrna asg.lif - ut_Series001.jpg	202.441	55.244	0	138
3	19 MAX_C1-tert mrna asg.lif - ut_Series001.jpg	160.449	48.474	0	111
4	19 MAX_C1-tert mrna asg.lif - ut_Series001.jpg	236.104	51.084	0	150
5	19 MAX_C1-tert mrna asg.lif - ut_Series001.jpg	236.104	56.926	0	143
6	19 MAX_C1-tert mrna asg.lif - ut_Series001.jpg	159.813	45.79	0	127
7	19 MAX_C1-tert mrna asg.lif - ut_Series001.jpg	186.94	52.464	0	154
8	19 MAX_C1-tert mrna asg.lif - ut_Series001.jpg	140.726	46.282	0	150
9	19 MAX_C1-tert mrna asg.lif - ut_Series001.jpg	118.399	52.332	0	114
10	19 MAX_C1-tert mrna asg.lif - ut_Series001.jpg	143.502	50.038	0	141
11	19 MAX_C1-tert mrna asg.lif - ut_Series001.jpg	190.353	52.432	0	159
12	19 MAX_C1-tert mrna asg.lif - ut_Series001.jpg	181.098	58.063	0	168
13	19 MAX_C1-tert mrna asg.lif - ut_Series001.jpg	189.89	43.433	0	158
14	19 MAX_C1-tert mrna asg.lif - ut_Series001.jpg	202.152	58.004	0	161
15	19 MAX_C1-tert mrna asg.lif - ut_Series001.jpg	195.269	44.962	0	153
16	19 MAX_C1-tert mrna asg.lif - ut_Series001.jpg	193.823	51.033	0	153
17	19 MAX_C1-tert mrna asg.lif - ut_Series001.jpg	142.923	44.887	0	129
18	19 MAX_C1-tert mrna asg.lif - ut_Series001.jpg	145.642	49.008	0	126
19	19 MAX_C1-tert mrna asg.lif - ut_Series001.jpg	212.101	51.353	0	118
20	19 MAX_C1-tert mrna asg.lif - ut_Series001.jpg	226.618	55.548	0	131
21	19 MAX_C1-tert mrna asg.lif - ut_Series001.jpg	207.647	46.326	0	141
22	19 MAX_C1-tert mrna asg.lif - ut_Series001.jpg	168.778	48.255	0	117
23	19 MAX_C1-tert mrna asg.lif - ut_Series001.jpg	346.464	44.143	0	138
24	19 MAX_C1-tert mrna asg.lif - ut_Series001.jpg	127.133	84.598	0	153
25	19 MAX_C1-tert mrna asg.lif - ut_Series001.jpg	156.516	101.96	0	154
26	19 MAX_C1-tert mrna asg.lif - ut_Series001.jpg	164.324	54.894	0	136
27	19 MAX_C1-tert mrna asg.lif - ut_Series001.jpg	157.962	54.814	0	139
28	19 MAX_C1-tert mrna asg.lif - ut_Series001.jpg	265.892	49.523	0	122
29	19 MAX_C1-tert mrna asg.lif - ut_Series001.jpg	199.144	54.089	0	130
30	19 MAX_C1-tert mrna asg.lif - ut_Series001.jpg	228.643	52.822	0	119
			53.837

## Sheet: WT OVEREXPRESSED  B
	label	area	mean
64	1 MAX_C1-tert mrna asg.lif - wt_oex_Series004.jpg	274.163	76.244	0	199
65	1 MAX_C1-tert mrna asg.lif - wt_oex_Series004.jpg	161.49	85.475	0	200
66	1 MAX_C1-tert mrna asg.lif - wt_oex_Series004.jpg	99.543	82.489	0	204
67	1 MAX_C1-tert mrna asg.lif - wt_oex_Series004.jpg	154.665	48.274	0	202
68	1 MAX_C1-tert mrna asg.lif - wt_oex_Series004.jpg	258.951	40.553	0	167
69	1 MAX_C1-tert mrna asg.lif - wt_oex_Series004.jpg	108.161	80.864	0	194
70	4MAX_C1-tert mrna asg.lif - wt_oex_Series003.jpg	288.623	51.119	0	197
71	4MAX_C1-tert mrna asg.lif - wt_oex_Series003.jpg	353.925	41.05	0	185
72	4MAX_C1-tert mrna asg.lif - wt_oex_Series003.jpg	332.929	46.255	0	199
73	4MAX_C1-tert mrna asg.lif - wt_oex_Series003.jpg	266.528	48.945	0	185
74	4MAX_C1-tert mrna asg.lif - wt_oex_Series003.jpg	564.927	73.578	0	193
75	4MAX_C1-tert mrna asg.lif - wt_oex_Series003.jpg	154.781	46.451	0	181
76	8 MAX_C1-tert mrna asg.lif - wt_oex_Series002.jpg	294.581	47.309	0	170
77	8 MAX_C1-tert mrna asg.lif - wt_oex_Series002.jpg	151.889	60.092	0	182
78	8 MAX_C1-tert mrna asg.lif - wt_oex_Series002.jpg	151.484	55.989	0	197
79	8 MAX_C1-tert mrna asg.lif - wt_oex_Series002.jpg	314.999	46.486	0	178
80	8 MAX_C1-tert mrna asg.lif - wt_oex_Series002.jpg	314.999	39.857	0	187
81	8 MAX_C1-tert mrna asg.lif - wt_oex_Series002.jpg	190.353	50.257	0	178
82	8 MAX_C1-tert mrna asg.lif - wt_oex_Series002.jpg	118.631	57.834	0	171
83	8 MAX_C1-tert mrna asg.lif - wt_oex_Series002.jpg	173.405	86.57	0	201
84	8 MAX_C1-tert mrna asg.lif - wt_oex_Series002.jpg	163.804	81.583	0	202
85	8 MAX_C1-tert mrna asg.lif - wt_oex_Series002.jpg	187.461	60.723	0	184
86	1 MAX_C1-tert mrna asg.lif - wt_oex_Series004.jpg	101.741	70.092	0	197
87	1 MAX_C1-tert mrna asg.lif - wt_oex_Series004.jpg	117.589	64.413	0	203
88	1 MAX_C1-tert mrna asg.lif - wt_oex_Series004.jpg	298.456	53.597	0	168
89	1 MAX_C1-tert mrna asg.lif - wt_oex_Series004.jpg	333.565	43.049	0	168
90	8 MAX_C1-tert mrna asg.lif - wt_oex_Series002.jpg	259.183	40.028	0	178
91	8 MAX_C1-tert mrna asg.lif - wt_oex_Series002.jpg	264.446	45.485	0	175
92	8 MAX_C1-tert mrna asg.lif - wt_oex_Series002.jpg	282.203	47.038	0	172
93	8 MAX_C1-tert mrna asg.lif - wt_oex_Series002.jpg	283.938	46.917	0	199
			57.2872

## Sheet: R17H OVEREXPRESSED  B
	label	area	mean
31	10 MAX_C1-tert mrna asg.lif - r17h_Series007.jpg	160.796	68.285	0	198
32	10 MAX_C1-tert mrna asg.lif - r17h_Series007.jpg	169.588	79.553	0	173
33	10 MAX_C1-tert mrna asg.lif - r17h_Series007.jpg	336.862	50.822	0	188
34	10 MAX_C1-tert mrna asg.lif - r17h_Series007.jpg	171.554	101.162	0	199
35	10 MAX_C1-tert mrna asg.lif - r17h_Series007.jpg	239.286	59.558	0	178
36	10 MAX_C1-tert mrna asg.lif - r17h_Series007.jpg	256.175	60.628	0	191
37	10 MAX_C1-tert mrna asg.lif - r17h_Series007.jpg	255.076	64.769	0	190
38	10 MAX_C1-tert mrna asg.lif - r17h_Series007.jpg	181.214	98.603	0	203
39	10 MAX_C1-tert mrna asg.lif - r17h_Series007.jpg	196.31	54.378	0	196
40	16 MAX_C1-tert mrna asg.lif - r17h_oex_Series005.jpg	139.974	56.442	0	194
41	16 MAX_C1-tert mrna asg.lif - r17h_oex_Series005.jpg	271.213	63.93	0	190
42	16 MAX_C1-tert mrna asg.lif - r17h_oex_Series005.jpg	154.087	60.307	0	195
43	16 MAX_C1-tert mrna asg.lif - r17h_oex_Series005.jpg	330.442	52.343	0	192
44	16 MAX_C1-tert mrna asg.lif - r17h_oex_Series005.jpg	520.794	51.927	0	162
45	16 MAX_C1-tert mrna asg.lif - r17h_oex_Series005.jpg	173.926	82.822	0	170
46	16 MAX_C1-tert mrna asg.lif - r17h_oex_Series005.jpg	360.75	54.184	0	173
47	16 MAX_C1-tert mrna asg.lif - r17h_oex_Series005.jpg	175.256	73.762	0	202
48	16 MAX_C1-tert mrna asg.lif - r17h_oex_Series005.jpg	230.899	67.418	0	166
49	16 MAX_C1-tert mrna asg.lif - r17h_oex_Series005.jpg	221.124	64.877	0	189
50	16 MAX_C1-tert mrna asg.lif - r17h_oex_Series005.jpg	187.229	82.821	0	194
51	16 MAX_C1-tert mrna asg.lif - r17h_oex_Series005.jpg	143.444	82.925	0	204
52	16 MAX_C1-tert mrna asg.lif - r17h_oex_Series005.jpg	183.238	80.332	0	186
53	16 MAX_C1-tert mrna asg.lif - r17h_oex_Series005.jpg	105.327	68.004	0	167
54	16 MAX_C1-tert mrna asg.lif - r17h_oex_Series005.jpg	123.72	75.597	0	163
55	13 MAX_C1-tert mrna asg.lif - r17h_Series006.jpg	153.624	96.153	0	193
56	13 MAX_C1-tert mrna asg.lif - r17h_Series006.jpg	108.913	110.525	0	202
57	13 MAX_C1-tert mrna asg.lif - r17h_Series006.jpg	212.852	73.596	0	199
58	13 MAX_C1-tert mrna asg.lif - r17h_Series006.jpg	263.752	114.331	0	202
59	13 MAX_C1-tert mrna asg.lif - r17h_Series006.jpg	87.455	102.546	0	201
60	13 MAX_C1-tert mrna asg.lif - r17h_Series006.jpg	497.253	57.284	0	194
			73.6628
