# Supplementary material for: Telomeres control human telomerase (TERT) expression through non-telomeric TRF2
Source: eLife. 2025 Sep 30;14:RP104045. doi: 10.7554/eLife.104045 (PMC12483519; doi:10.7554/eLife.104045)
Supplement: Figure 10—source data 1. [file elife-104045-fig10-data1.xlsx]

## Sheet: FIBROBLAST -IPSC MRNA  10C
		FIB			iPSC									FIB			iPSC
		12.4836			13.1403									12.4856			13.2558
		12.3946			13.1449									12.405			13.1869
	18S	12.2894	12.3892		13.2356	13.1736	0.784381						18S	12.4302	12.4403		13.1293	13.1906	0.750361
		38.2436			33.9691									38.8539			33.5171
		38.7018			33.8734									38.9767			33.9966
	TERC	38.8166	38.5873		33.8634	33.902	-4.68535	44.3153					TERC	38.0361	38.6222		33.6766	33.7301	-4.89214	49.953
		40.1743			33.9823									38.5853			31.4112
		40.698			33.8786									38.4659			32.1253
	TERT	40.5853	40.4859		33.7768	33.8793	-6.60663	167.848					TERT	38.8402	38.6305		32.1891	31.9085	-6.72193	177.576
		33.1065			28.1274									33.2011			28.8148
		33.1466			28.2626									33.9714			28.5546
	NANOG	33.2999	33.1844		28.776	28.3887	-4.7957	47.8377					NANOG	33.1865	33.453		28.6265	28.6653	-4.78773	46.4656
		28.1204			22.3851									27.5928			21.8166
		28.0051			22.3399									27.5653			21.5743
	KLF4	28.8681	28.3312		22.4296	22.3849	-5.94626	106.2					KLF4	27.5134	27.5572		21.698	21.6963	-5.86091	97.7664

## Sheet: TRAP  10D
			Absorbance at 690 (neg. control adjusted)	Absorbance at 450 (neg. control adjusted)	Difference	Average	Fold change
	Fibroblast		0.0432	0.094	0.0508
			0.0438	0.0949	0.0511	0.05095	1
	ipsc		0.0445	0.9309	0.8864
			0.0428	0.8868	0.844	0.8652	16.9814
			Absorbance at 690	Absorbance at 450	Difference	Average
	negative control		0.0406	0.1122	0.0715
			0.0408	0.1077	0.0669	0.0692
						neg. control adjusted	Average	Fold change
	fibroblast		0.041	0.1195	0.0785	0.00929999
			0.0409	0.1265	0.0856	0.0164	0.01285
	ipsc		0.04	0.2626	0.2226	0.1534
			0.0413	0.284	0.2427	0.1735	0.16345	12.7199

## Sheet: TELOMERE LENGTH RT PCR  10E
			TEL				36B4
	REP 1
		FIB	17.9839				26.5926
			17.9602				26.5776
			17.9614	17.9685			26.3948	26.5216
			15.8158				25.2888
			15.6997				25.2786
		iPSC	15.7088	15.7414	-2.22705	4.68175	25.2898	25.2857	-1.23592	1.98774
	REP2
		FIB	17.3299				25.7892
			17.3469				25.901
			17.4172	17.3647			25.8736	25.8546
														4.68175
			15.3538				25.1187							3.18073
			15.9272				25.2318
		iPSC	15.8049	15.6953	-1.66936	3.18073	25.245	25.1985	-0.656107	2.01846

## Sheet: TRF2 ChIP 10F
FIBROBLAST	REPLICATE 1							REPLICATE 2
	Input	TRF2 ChIP	IgG					Input	TRF2 ChIP	IgG
	33.4648	26.0276	27.3304	33.433	26.2534	27.4171		33.4648	26.0276	27.3304	33.433	26.2534	27.4605
	32.9872	26.43	27.4453	30.113	144.974	64.7109		32.9872	26.43	27.4453			2.30868
TERT 0-300	33.8472	26.3026	27.4756			2.24033		33.8472	26.3026	27.4756
	32.0041	36.9236	36.8748	32.7376	36.719	36.8414		30.3643	35.1444	35.3456	30.6618	35.5275	35.4604
	39.2014	36.5029	36.9758			1.08858		30.5253	35.7736	35.4766			0.954556
GAPDH	33.471	36.7304	36.6737					31.0958	35.6646	35.559
	16.4959	18.9109	22.4962	16.7396	18.7048	22.5329		14.6743	13.2371	18.1604	14.5819	13.457	18.1232
	16.7482	18.749	22.5535			14.203		14.3424	13.804	18.1419			25.3898
TEL	16.9745	18.4545	22.549					14.7289	13.3299	18.0673
																			1.66
																			0.03
iPSC LT	REPLICATE 1							REPLICATE 2
	Input	TRF2 ChIP	IgG					Input	TRF2 ChIP	IgG
	35.5537	26.9614	27.4986	37.087	27.0189	27.7463		32.6379	32.5455	33.4918	32.7104	32.9085	33.7095
	35.8308	27.0077	27.808			1.65569		32.9831	33.4788	34.9979			1.74238
TERT 0-300	39.8763	27.0876	27.9324					32.5104	32.7011	33.9272
	35.403	44.7971	35.559	34.8992	41.4498	36.2655		32.6379	35.6124	33.4322	32.7104	35.6095	33.502
	34.8869	40.6493	36.1943			0.027502		32.9831	35.6912	33.4651			0.232042
GAPDH	34.4078	38.903	37.0431			0		32.5104	35.525	33.6086
	13.7795	14.2349	17.3057	13.7922	14.2469	17.9783		12.9775	13.5066	16.1538	12.5672	13.4446	15.962
	13.7564	14.265	19.6156			13.2823		12.6358	13.433	15.9272			5.72546
TEL	13.8408	14.2408	17.0137					12.0884	13.3941	15.8049

## Sheet: REST ChIP  10G
		30.0145						29.3633							31.1768
		30.022						29.2944	29.2746						31.5945
iPSC Input 1	0-300	29.5048	29.7634			iPSC Input 1	GAPDH	29.1661	26.0546				iPSC Input 1	SYNAPSIN	31.2022	31.3245
		29.8048						30.5255							29.3915	28.1045
		29.3229						29.8029	30.0359	3.98131	6.3315	1.43787			29.2005
iPSC REST 1	0-300	29.6186	29.5821	0.00675425		iPSC REST 1	GAPDH	29.7794					iPSC REST 1	SYNAPSIN	28.5105	29.0342	0.929697	52.4969	8.52778
		29.64						30.6566							33.1332
		21.3952						29.8469	30.5599	4.50524	4.40339				32.6459
iPSC IgG 1	0-300	23.3491	22.3721			iPSC IgG 1	GAPDH	31.1761					iPSC IgG 1	SYNAPSIN	30.6	32.1264	4.02187	6.15598
		30.4856						38.8018							31.3323
		30.3209						31.3111	33.5577						31.5852
iPSC Input 2	0-300	29.9676	30.1442			iPSC Input 2	GAPDH	30.5603	30.3377				iPSC Input 2	SYNAPSIN	31.0034	31.307
		30.5127						30.4116							29.1774	28.087
		30.5402						33.1647							28.981
iPSC REST 2	0-300	30.6701	30.5743	0.644159		iPSC REST 2	GAPDH	35.9966	33.8303	33.8303	6.54724e-09	0.667091	iPSC REST 2	SYNAPSIN	28.6852	28.9479	0.860902	55.0608	9.11131
		30.832						32.3297							32.458
		29.9283						33.1799							31.724
iPSC IgG 2	0-300	29.9513	29.9398			iPSC IgG 2	GAPDH	33.3127	33.2463	33.2463	9.81462e-09		iPSC IgG 2	SYNAPSIN	32.2245	32.1355	4.04856	6.04313
		32.0325						30.6144							32.0325
		32.2333						30.5848	30.4536						32.2333
FIB Input 1	0-300	32.1558	32.1405			FIB Input 1	GAPDH	30.1616	27.2336				FIB Input 1	SYNAPSIN	32.1558	32.1405
		30.156						33.5335							34.2093	28.9205
		30.4133						33.9468	33.1284	5.89478	1.68072	0.45852			34.0036
FIB REST 1	0-300	30.2664	30.2786	1.75777		FIB REST 1	GAPDH	31.9047					FIB REST 1	SYNAPSIN	34.745	34.3193	5.39878	2.37031	40.6954
		31.1344						33.1924							43.9747
		30.9308						31.4716	32.0034	4.76983	3.66554				39.5225
FIB IgG 1	0-300	31.2117	31.0923			FIB IgG 1	GAPDH	31.3463					FIB IgG 1	SYNAPSIN	39.8097	39.6661	10.7456	0.0582451
		34.014						25.2426							25.9252
		38.831						25.2563							25.7703
FIB Input 2	0-300	33.6199	33.8169			FIB Input 2	GAPDH	25.4666	25.3218				FIB Input 2	SYNAPSIN	25.8505	25.8487
		33.795						43.935							30.939
		33.0414						44.1069							31.5476
FIB REST 2	0-300	33.1306	33.086	2.59198		FIB REST 2	GAPDH	43.4344	43.8254	1.35722		0.390334	FIB REST 2	SYNAPSIN	31.5776	31.3547	-2.73836		6.67312
		35.2383						41.1287							33.9884
		34.4483						43.2995							33.8438
FIB IgG 2	0-300	34.4718	34.46			FIB IgG 2	GAPDH	42.9765	42.4682				FIB IgG 2	SYNAPSIN	34.4471	34.0931

## Sheet:  EZH2  10H
		31.8478								32.0041
		32.5776								39.2014
iPSC Input 1	0-300	33.0163	32.2127					iPSC Input 1	GAPDH	33.471	32.7376
		27.1414								32.5322
		27.4743								33.0805
iPSC EZH2 1	0-300	30.1653	27.3079	0.472003				iPSC EZH2 1	GAPDH	33.3314	32.9814	0.343455
		26.3829								31.1012
		26.1478				0.472003				31.7435
iPSC IgG1	0-300	26.1434	26.2247			0.548569		iPSC IgG1	GAPDH	31.474	31.4396
		33.4648								30.3643
		32.9872								30.5253
iPSC Input 2	0-300	33.8472	33.226					iPSC Input 2	GAPDH	31.0958	30.4448
		29.2071								30.6488
		29.3302								30.3962
iPSC EZH2 2	0-300	29.2705	29.2693	0.548569				iPSC EZH2 2	GAPDH	30.609	30.5513	1.29379
		28.5039								30.9631
		28.2558								30.8882
iPSC IgG 2	0-300	28.4494	28.403					iPSC IgG 2	GAPDH	30.9174	30.9229
		35.2509								34.1626
		33.143								33.692
FIB Input 1	0-300	32.577	32.86					FIB Input 1	GAPDH	34.6957	34.1938
		27.2655								44.8332
		27.1395								36.0446
FIB EZH2 1	0-300	27.2561	27.2204	3.89203				FIB EZH2 1	GAPDH	34.702	38.5266	0.0243015
		29.1132								33.0186
		29.28								32.2774
FIB IgG 1	0-300	29.1494	29.1809					FIB IgG 1	GAPDH	34.1954	33.1638
		32.6379								31.0843
		32.9831								30.846
FIB Input 2	0-300	32.5104	32.7104					FIB Input 2	GAPDH	31.5309	31.1538
		26.3094								34.111
		26.5744								35.488
FIB EZH2 2	0-300	26.6389	26.5076	2.97092				FIB EZH2 2	GAPDH	32.9957	34.1983	0.935745
		28.0167								34.6294
		28.2009								34.3692
FIB IgG 2	0-300	28.0178	28.0785					FIB IgG 2	GAPDH	33.3087	34.1024
				3.89203
				2.97092

## Sheet: H3K27ME3 10I
		0-300 bp							GAPDH
		30.1876							29.6551
		30.3088							29.4646
	FIB Input	30.6133	30.3699				GAPDH	FIB Input	29.8973	29.6724
0-300 bp		33.0876							26.542
		33.2612							26.5063
	Fib H3		33.1744	-1.59314	3.01705		GAPDH	Fib H3	26.3126	26.4536	4.86734	0.0342598
		31.3092							31.2384
		31.5099							30.5381
	Fib 27me3	31.9247	31.5813				GAPDH	Fib 27me3	32.1864	31.321
		36.9998							27.9015
		38.9561							27.808
	FIB Input	36.1439	37.3666					FIB Input	27.9295	27.8797
0-300 bp		37.4015							35.071
		34.7532					GAPDH		35.094
	Fib H3	37.0009	37.2012	-1.49299	2.81472			Fib H3	34.3922	34.7316	5.35542	0.0244264
		36.7608							43.1066
		35.3038
	Fib 27me3	35.06	35.7082					Fib 27me3	37.0674	40.087
		0-300 bp							GAPDH
		30.4711							30.229
		30.4763							30.5912
ipsc Input 1	0-300	29.8565	30.268				ipsc Input 1	GAPDH	31.3323	30.4101
		29.5474							31.8973
		29.2876							31.0019
ipsc H3 1	0-300	28.9625	29.2658				ipsc H3 1	GAPDH	32.0162	31.4496
		29.6439		0.809385					31.2357		1.15299
		29.3158							31.1922
ipsc 27Me3 1	0-300	29.7531	29.5709				ipsc 27Me3 1	GAPDH	31.3048	31.2442
		31.73							30.229
		31.89							30.5912
ipsc Input 2	0-300	33.0296	32.2165				ipsc Input 2	GAPDH	31.3323	30.4101
		32.0289							31.5852
		32.1174							31.0034
iPSC H3 2	0-300	32.3613	32.1692				iPSC H3 2	GAPDH	32.1661	31.2943
		32.5947		0.678727					30.9794		1.21789
		32.6719							31.0404
ipsc 27Me3 2	0-300	32.9183	32.7283				ipsc 27Me3 2	GAPDH	31.8503	31.0099
		gapdh			300-450			0-300
	ipsc tel h3k27me3				31.8622			23.8829
		38.5964			33.5166			23.5997
			38.5964	5.48859	31.2766	31.5694	3.98183	23.7314	23.738	-0.525243
	tel h3 1	33.113		0.0222725	27.4284		0.0632923	24.2503		1.43918
		33.1423			27.7442			24.2897
		33.0679	33.1078		27.59	27.5875		24.2497	24.2632
	ipsc tel 27me3 2	35.6173			30.4863			24.0144
		34.274			29.4616			23.899
		35.2513	35.0475	1.13501	30.0894	30.0124	2.62019	22.9964	23.9567	-0.717279
	h3 2	33.4722		0.455333	27.3296		0.162646	24.6717		1.64408
		34.3529			27.4549			24.8315
		36.6264	33.9125		28.0829	27.3922		24.5188	24.674
	input	31.2919			25.8694			24.8053
		31.7397			27.0029			24.6918
		31.8388	31.7892		27.4792	27.241		25.0213	24.8395
