# Supplementary material for: Telomeres control human telomerase (TERT) expression through non-telomeric TRF2
Source: eLife. 2025 Sep 30;14:RP104045. doi: 10.7554/eLife.104045 (PMC12483519; doi:10.7554/eLife.104045)
Supplement: Figure 11—source data 1. [file elife-104045-fig11-data1.xlsx]

## Sheet: TL RTPCR IPSC STLT  11B
				36B4 rep1			Tel rep1
			24.0608				13.1011
			23.9606				13.5072
		wt 50	23.9288	23.9834		wt 50	12.9451	13.1844
			23.897				13.5873
			23.4963				13.6173
		tel 50	23.4621	23.6185	-0.364926	tel 50	13.6587	13.6211	0.436647	0.801573	0.573723
				36B4 rep2			Tel rep2
			23.92				12.36
			23.14				12.52
		wt 50	23.14	23.4		wt 50	12.43	12.4367
			23.06				13.08
			23.15				13.16
		tel 50	23.71	23.3067	-0.0933333	tel 50	13.13	13.1233	0.686667	0.78	0.582367

## Sheet: TRF2 ChIP iPSC-STLT  11C
iPSC LT	REPLICATE 1							REPLICATE 2
	Input	TRF2 ChIP	IgG					Input	TRF2 ChIP	IgG
	35.5537	26.9614	27.4986	37.087	27.0189	27.7463		32.6379	32.5455	33.4918	32.7104	32.9085	33.7095
	35.8308	27.0077	27.808			1.65569		32.9831	33.4788	34.9979			1.74238
TERT 0-300	39.8763	27.0876	27.9324					32.5104	32.7011	33.9272
	35.403	44.7971	35.559	34.8992	41.4498	36.2655		32.6379	35.6124	33.4322	32.7104	35.6095	33.502
	34.8869	40.6493	36.1943			0.027502		32.9831	35.6912	33.4651			0.232042
GAPDH	34.4078	38.903	37.0431			0		32.5104	35.525	33.6086
	13.7795	14.2349	17.3057	13.7922	14.2469	17.9783		12.9775	13.5066	16.1538	12.5672	13.4446	15.962
	13.7564	14.265	19.6156			13.2823		12.6358	13.433	15.9272			5.72546
TEL	13.8408	14.2408	17.0137					12.0884	13.3941	15.8049
Ipsc ST		REP 1							rep 2
			33.1514						32.5686
			33.7215	33.4365					32.3015
		TRF2	34.235					TRF2	32.5001	32.4567
			34.5714						34.2945
			40.066	34.4032	-0.966738	1.95442			35.2275
	0-300	IgG	31.952				0-300	IgG	34.8705	34.5825	-2.12579	4.36442
			29.3292						28.2493
			29.8684	29.5573					27.8194
		TRF2	29.7053					TRF2	27.9924	28.1209
			29.2746						27.6076
			29.5027	29.4942	0.0631251	0.957188			29.6415
	GAPDH	IgG					GAPDH	IgG	28.7615	28.1846	-0.0636976	1.04514
			12.5399						15.2405
		Tel TRF2	12.1703	12.3551				Tel TRF2	15.176	15.2083
			15.4748						18.4784
			15.4492						18.7876
	Telomere	Tel IgG	15.9483	15.6241	-3.26906	9.64021	telomere	Tel IgG	18.8095	18.6919	-3.48359	11.1857

## Sheet: H3K27ME3 ipsc stlt  11D
Ipsc lt		0-300 bp							GAPDH
		30.4711							30.229
		30.4763							30.5912
ipsc Input 1	0-300	29.8565	30.268				ipsc Input 1	GAPDH	31.3323	30.4101
		29.5474							31.8973
		29.2876							31.0019
ipsc H3 1	0-300	28.9625	29.2658				ipsc H3 1	GAPDH	32.0162	31.4496
		29.6439		0.809385					31.2357		1.15299
		29.3158							31.1922
ipsc 27Me3 1	0-300	29.7531	29.5709				ipsc 27Me3 1	GAPDH	31.3048	31.2442
		31.73							30.229
		31.89							30.5912
ipsc Input 2	0-300	33.0296	32.2165				ipsc Input 2	GAPDH	31.3323	30.4101
		32.0289							31.5852
		32.1174							31.0034
iPSC H3 2	0-300	32.3613	32.1692				iPSC H3 2	GAPDH	32.1661	31.2943
		32.5947		0.678727					30.9794		1.21789
		32.6719							31.0404
ipsc 27Me3 2	0-300	32.9183	32.7283				ipsc 27Me3 2	GAPDH	31.8503	31.0099
iPSC ST
		gapdh						0-300
	ipsc tel h3k27me3						ipsc tel h3k27me3	23.8829
		38.5964						23.5997
			38.5964	5.48859				23.7314	23.738	-0.525243
	tel h3 1	33.113		0.0222725			tel h3 1	24.2503		1.43918
		33.1423						24.2897
		33.0679	33.1078					24.2497	24.2632
	ipsc tel 27me3 2	35.6173					ipsc tel 27me3 2	24.0144
		34.274						23.899
		35.2513	35.0475	1.13501				22.9964	23.9567	-0.717279
	h3 2	33.4722		0.455333			h3 2	24.6717		1.64408
		34.3529						24.8315
		36.6264	33.9125					24.5188	24.674
	input	31.2919					input	24.8053
		31.7397						24.6918
		31.8388	31.7892					25.0213	24.8395

## Sheet: ipsc short long (STLT) mrna 11E
REp1										Rep 2			14.83
		11.28											14.75
	UT	10.61	10.945									Control	13.72	14.4333
		11.62											15.49
GAPDH		11.53											15.65
	Tel	16.11	11.575	0.63							GAPDH	Tel	15.39	15.51	1.07667
		27.68											23.16
		27.97											23.16
	UT	27.73	27.7933									Control	23.28	23.2
		28.65											24.36
TRF2		28.64											24.34
	Tel	28.58	28.6233	0.83	0.2	0.870551					TRF2	Tel	24.16	24.2867	1.08667	0.01	0.993092
		28.54											24.36
		29.09											24.36
	UT	29.34	28.99									Control	24.4	24.3733
		31.81											26.57
hTR		31.49											26.37
	Tel	31.41	31.57	2.58	1.95	0.258816					Full hTERT	Tel	26.41	26.45	2.07667	1	0.5
		29.92											19.21
		29.91											19.06
	UT	29.82	29.8833									Control	18.98	19.0833
		31.23											20.85
hTERT15-16		31.14											20.82
	Tel	31.23	31.2	1.31667	0.686667	0.621288					hTR	Tel	20.94	20.87	1.78667	0.71	0.61132
